# Supplementary material for: Review of Current Human Genome-Scale Metabolic Models for Brain Cancer and Neurodegenerative Diseases
Source: Cells. 2022 Aug 10;11(16):2486. doi: 10.3390/cells11162486 (PMC9406599; doi:10.3390/cells11162486)
Supplement: Supplementary file 1 [file cells-11-02486-s001.zip › supplementary File 1.pdf]

## Supplementary File 1:

|                                              | DOI                                                                                            | Code/Model                                                                                                                                                                                                                                                                                                                                 |
|----------------------------------------------|------------------------------------------------------------------------------------------------|--------------------------------------------------------------------------------------------------------------------------------------------------------------------------------------------------------------------------------------------------------------------------------------------------------------------------------------------|
| <b>Lewis2010</b><br>(iNL403)                 | <a href="https://doi.org/10.1038/nbt.1711">DOI: 10.1038/nbt.1711</a>                           | <b>Model:</b> <a href="#">Supplementary Model 1</a>                                                                                                                                                                                                                                                                                        |
| <b>Sertbaş2014</b><br>(iMS570)               | <a href="https://doi.org/10.1016/j.fob.2014.05.006">DOI: 10.1016/j.fob.2014.05.006</a>         | <b>Model:</b> <a href="http://www.systemsbioinformatics.info.tr/downloads/iMS570_cobra_with_constraints.xml">http://www.systemsbioinformatics.info.tr/downloads/iMS570_cobra_with_constraints.xml</a>                                                                                                                                      |
| <b>Özcan2016</b>                             | <a href="https://doi.org/10.3389/fnins.2016.00156">DOI: 10.3389/fnins.2016.00156</a>           | <b>Model:</b> Supplementary MateriaDataSheet2.ZIP (iMS570g_growth_implemented.xml)                                                                                                                                                                                                                                                         |
| <b>MartínJiménez2017</b>                     | <a href="https://doi.org/10.3389/fnagi.2017.00023">DOI: 10.3389/fnagi.2017.00023</a>           | <b>Model:</b> <a href="https://www.ebi.ac.uk/biomodels/MODEL1608180000">https://www.ebi.ac.uk/biomodels/MODEL1608180000</a>                                                                                                                                                                                                                |
| <b>Thiele2020</b>                            | <a href="https://doi.org/10.15252/msb.20198982">DOI: 10.15252/msb.20198982</a>                 | <b>Model:</b> <a href="https://github.com/opencobra/COBRA.papers/tree/master/2020_WholeBodyModelling/SuppliedResults">https://github.com/opencobra/COBRA.papers/tree/master/2020_WholeBodyModelling/SuppliedResults</a> , OrganAtlas_Harvey.mat, OrganAtlas_Harvetta.mat                                                                   |
| <b>Baloni2020</b>                            | <a href="https://doi.org/10.1016/j.xcrm.2020.100138">DOI: 10.1016/j.xcrm.2020.100138</a>       | <b>Model</b> and <b>code:</b> <a href="https://github.com/PriceLab/Bile_acid_AD">https://github.com/PriceLab/Bile_acid_AD</a>                                                                                                                                                                                                              |
| <b>EcheverriPeña2021</b><br>(Neuro-Glia_GEM) | <a href="https://doi.org/10.1016/j.heliyon.2021.e07671">DOI: 10.1016/j.heliyon.2021.e07671</a> | <b>Model:</b> <a href="https://github.com/dasalazarb/Neuro-Glia_GEM/blob/main/Neuron_Glia_GEM.xml">https://github.com/dasalazarb/Neuro-Glia_GEM/blob/main/Neuron_Glia_GEM.xml</a><br><b>Code:</b> <a href="https://github.com/dasalazarb/Neuro-Glia_GEM">https://github.com/dasalazarb/Neuro-Glia_GEM</a>                                  |
| <b>Lam2021</b>                               | <a href="https://doi.org/10.3390/biomedicines9101310">DOI: 10.3390/biomedicines9101310</a>     | <b>Models:</b> <a href="https://github.com/SimonLammm/ad-pd-retinoid/tree/main/supplementary-files/SuppFile2_iADPD">https://github.com/SimonLammm/ad-pd-retinoid/tree/main/supplementary-files/SuppFile2_iADPD</a><br><b>Code:</b> <a href="https://github.com/SimonLammm/ad-pd-retinoid">https://github.com/SimonLammm/ad-pd-retinoid</a> |
| <b>Larsson2020</b>                           | <a href="https://doi.org/10.3389/fgene.2020.00381">DOI: 10.3389/fgene.2020.00381</a>           | <b>Patient-derived</b> <b>models:</b> <a href="https://www.ebi.ac.uk/biomodels/MODEL1707110000">https://www.ebi.ac.uk/biomodels/MODEL1707110000</a><br><b>Code:</b> <a href="https://github.com/idalarsson/GEM-for-GBM">https://github.com/idalarsson/GEM-for-GBM</a>                                                                      |

Table S1: Public availability of brain genome-scale metabolic models

| Model                          | Transcriptomic                                | Proteomic                                                                  | Metabolomic | Other data used for manual curation/ validation                                                              |
|--------------------------------|-----------------------------------------------|----------------------------------------------------------------------------|-------------|--------------------------------------------------------------------------------------------------------------|
| <b>Lewis2010</b><br>(iNL403)   | -Microarray data of AD (GSE5281, n=161)       | -Human Protein Reference Database<br>-HINV<br>-HUPO brain proteome project |             | -Literature information for transport reactions for each compartment<br>- Constraints for neuron cell types. |
| <b>Sertbaş2014</b><br>(iMS570) | -Microarray data of six NDD (GSE26927, n=118) |                                                                            |             | -Literature-derived constraints for a healthy brain                                                          |

|                                                       |                                                                                                                                                                                                                                                             |                              |                                                                                                                                                                                                            |                                                                                                |
|-------------------------------------------------------|-------------------------------------------------------------------------------------------------------------------------------------------------------------------------------------------------------------------------------------------------------------|------------------------------|------------------------------------------------------------------------------------------------------------------------------------------------------------------------------------------------------------|------------------------------------------------------------------------------------------------|
| <b>Özcan2016</b>                                      | -Microarray data of three GBM cell lines (GSE13041-GPL570, n=54; GSE13041-GPL96, n=191; GSE13276, n=15)                                                                                                                                                     |                              |                                                                                                                                                                                                            | -Curated growth objective function<br>-Literature-derived constraints for 26 reactions for GBM |
| <b>MartínJiménez2017</b>                              | -Microarray data of foetal cortical astrocytes (GSE53404, n=3)                                                                                                                                                                                              |                              |                                                                                                                                                                                                            | -Literature-derived constraints for healthy astrocyte exchange reactions                       |
| <b>Thiele2020</b>                                     |                                                                                                                                                                                                                                                             | -Human Proteome Map<br>- HPA | - Human Metabolome Database and other resources.                                                                                                                                                           | - Organ-specific reactions from literature                                                     |
| <b>Baloni2020</b>                                     | - RNA-Seq data for brain regions from post-mortem of normal and AD patients ( <a href="https://www.synapse.org/#!Synapse:syn2580853/">https://www.synapse.org/#!Synapse:syn2580853/</a> ).                                                                  | - HPA                        | - Metabolomics of primary and secondary bile acids from the post-mortem brain samples ( <a href="https://www.synapse.org/#!Synapse:syn10235594">https://www.synapse.org/#!Synapse:syn10235594</a> , n=111) | - BBB reactions from <b>Thiele2020</b><br>- Constraints from <b>Lewis2010</b>                  |
| <b>EcheverriPeña2021</b><br>( <i>Neuro-Glia_GEM</i> ) |                                                                                                                                                                                                                                                             |                              |                                                                                                                                                                                                            | - Reactions of the sulfatide degradation from the myelin band                                  |
| <b>Lam2021</b>                                        | - RNA-Seq of healthy brain from HPA & GTEx<br>- CAGE expression of healthy brain samples from FANTOM5<br>- RNA-Seq of AD and PD brain samples from Rajkumar dataset and Zhang/Zheng dataset<br>- Single-cell RNA-Seq of AD and PD brain samples from ROSMAP |                              |                                                                                                                                                                                                            | - Constraints from Baloni2020                                                                  |
| <b>Larsson2020</b>                                    | - RNAseq of TCGA-GBM (n=166)                                                                                                                                                                                                                                |                              |                                                                                                                                                                                                            | - CRISPR-Cas9 data for GBM<br>- Healthy brain GEM from HMA                                     |

**Table S2: Detailed type of OMICs for the data used in the brain metabolic models and the number of samples.**

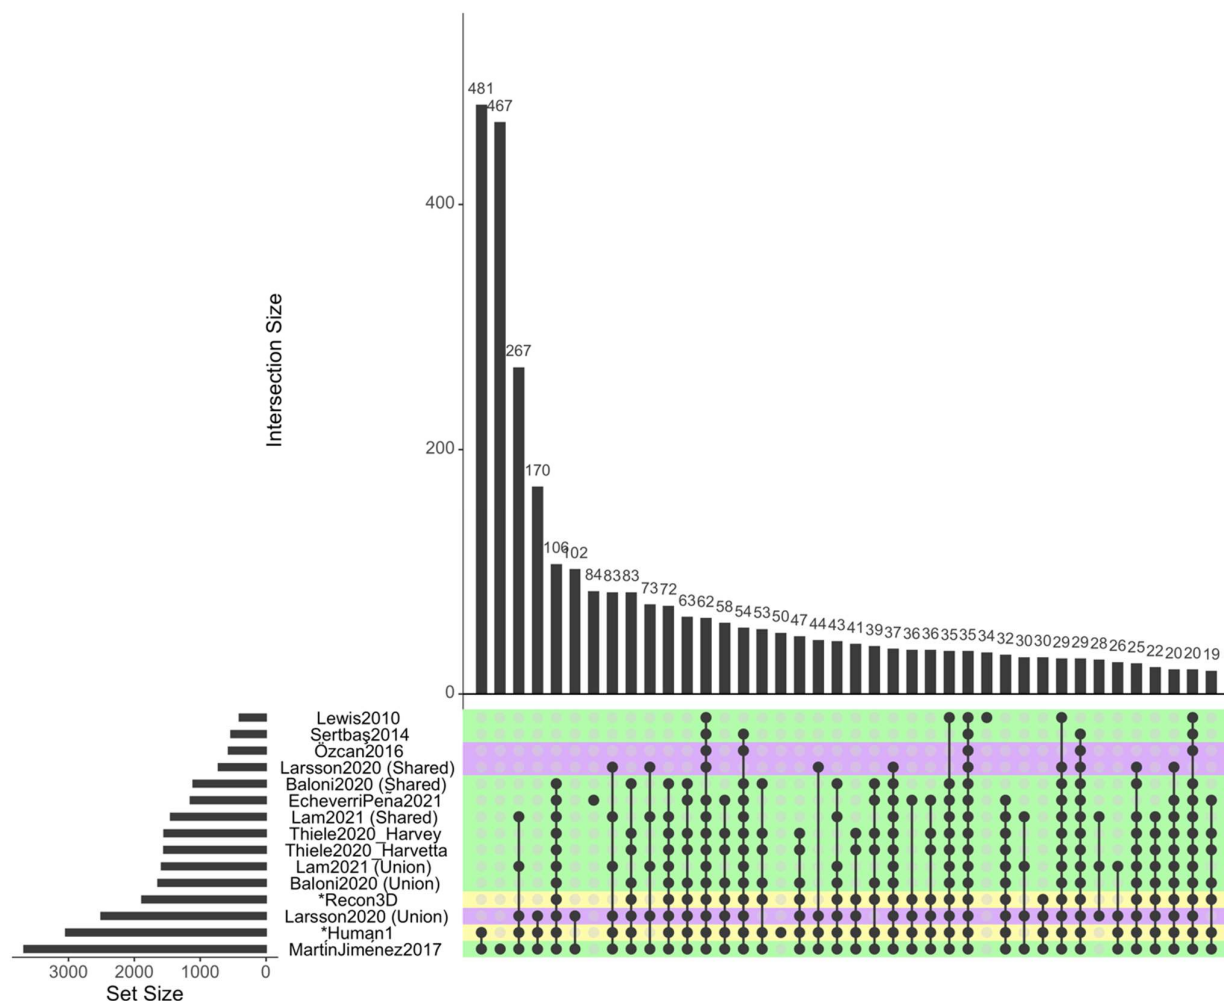

**Figure S1: Low overlap between the genes included in the brain genome-scale metabolic models:**

To evaluate the overlap between the genes of the brain models, the intersection of these genes was counted in an UpSet plot. Brain models were retrieved as explained in **Supplementary 1, Table S1** in addition to two consistent generic models (Human1 and Recon3D). For studies that have more than two models (**Baloni2020**, **Larsson2020** and **Lam2021**), the intersection and the union of all the model's genes were appended into two gene lists. The y-axis represents the number of intersected genes between different sets on the x-axis, and the "Set Size" represents the total number of genes in that set.
