# Supplementary material for: Review of Current Human Genome-Scale Metabolic Models for Brain Cancer and Neurodegenerative Diseases
Source: Cells. 2022 Aug 10;11(16):2486. doi: 10.3390/cells11162486 (PMC9406599; doi:10.3390/cells11162486)
Supplement: Supplementary file 1 [file cells-11-02486-s001.zip › Supplementary File 2.xlsx]

## Sheet: Summary
Table S3	Identified metabolites bypassing the blood-brain barrier in four brain reconstructions from Thiele et al., 2020, Table EV9 and Baloni et al., 2020, Table S12
Table S4	The metabolic composition of the cerebrospinal fluid used in Thiele2020 model from Thiele et al., 2020, Table EV8
Table S5	Brain-specific core and absent reactions used to build Thiele2020 model with FASTCORE from Thiele et al., 2020, Table EV1
Table S6	Experimental flux rates used in the astrocyte of Sertbaş2014 model from Sertbaş et., al 2014, Table 1
Table S7	Experimental flux rates used in the neuron of Sertbaş2014 model from Sertbaş et., al 2014, Table 1
Table S8	Experimental flux rates used in the MartínJiménez2017 hypoxic astrocyte model from MartínJiménez et al., 2017, Table 1
Table S9	Constraints used in the Özcan2016 glioblastoma model from Özcan et al., 2016, Table 1

## Sheet: Table S3
Lewis2010		MartínJiménez2017		Thiele2020		Baloni2020
Metabolite Names	VMH ID	Metabolite Names	VMH ID	Metabolite Names	VMH ID	Metabolite Names	VMH ID
25-Hydroxyvitamin D2	25hvitd2	(R)-3-hydroxybutanoate	bhb	L-Glutamic acid	glu_L	(24R)-24,25-Dihydroxycalciol	12harachd
25-Hydroxyvitamin D3	25hvitd3	apoC-lys	apoC_Lys	L-Carnitine	crn	Proton	23cump
L-3-Amino-isobutanoate	3aib	D-serine	ser_D	L-Lactic acid	lac_L	2-Hydroxybutyrate	2425dhvitd3
4-Aminobutanoate	4abut	Hemoglobin	M02050	L-Lysine	lys_L	Bicarbonate	2h3mv
Acetate	ac	Sodium	na1	L-Arginine	arg_L	Sodium	2hb
Acetoacetate	acac	Nitrite	no2	Ornithine	orn	2-Methylcitrate	2hiv
Acetaldehyde	acald	6-deoxy-L-galactose	fuc_L	L-Histidine	his_L	3,4-Dihydroxyphenylethyleneglycol	2hyoxplac
beta-Alanine	ala-B	Betaine	glyb	L-Glutamine	gln_L	L-Dopa	2m3hvac
L-Arginine	arg-L	Bilirubin-bisglucuronoside	bildglcur	L-Methionine	met_L	3-Methylimidazoleacetic Acid	2mcit
L-Asparagine	asn-L	Bilirubin-monoglucuronoside	bilglcur	L-Leucine	leu_L	17Beta-Hydroxy-5Alpha-Androstan-3-One	2obut
(R)-3-Hydroxybutanoate	bhb	Chloride	cl	L-Isoleucine	ile_L	Water	2oxoadp
Biotin	btn	D-lactate	lac_D	L-Valine	val_L	5-Hydroxy-L-Tryptophan	34dhoxmand
CO2	co2	Homoserine	hom_L	L-Phenylalanine	phe_L	5-Methyltetrahydrofolate	34dhoxpeg
L-Carnitine	crn	Prostaglandin E1	prostge1	L-Tryptophan	trp_L	L-Arabinitol	34dhpha
Hydrogen cyanide	cyan	Riboflavin	ribflv	L-Cysteine	cys_L	4-Aminobutanoate	34dhphe
L-Cysteine	cys-L	Thiamin-P	thmmp	L-Asparagine	asn_L	Acetone	34hpl
Deoxyguanosine	dgsn	Thyroxine	thyox_L	L-Alanine	ala_L	Acetate	34hpp
Deoxyuridine	duri	Fatty acid-retinol pool		D-Glucose	glc_D	Acetylcholine	35cgmp
Ethanol	etoh			D-Galactose	gal	Choline	3aib
Fe2+	fe2			Dehydroascorbic acid	dhdascb	3',8'-LD1	3hanthrn
D-Glucose	glc-D			Potassium	k	Ammonium	3hmp
L-Glutamine	gln-L			Choline	chol	Adenosine	3hpp
L-Glutamate	glu-L			Adenine	ade	Inosine	3mlda
Glycine	gly			Adenosine	adn	Adenine	3mob
Glycerol	glyc			Liothyronine	triodthy	Adrenaline	3mop
H+	h			(R)-3-Hydroxybutyric acid	bhb	2-Oxoglutarate	3mox4hoxm
H2O	h2o			Thyroxine	thyox_L	Glycine	3moxtyr
Hydrogen peroxide	h2o2			Testosterone	tststerone	L-Cysteinylglycine	3ohglutac
Bicarbonate	hco3			Estradiol	estradiol	Androsterone	3uib
L-Isoleucine	ile-L			Cortisol	crtsl	Arachidonate	3ump
potassium	k			Aldosterone	aldstrn	Arachidic Acid	4aabutn
D-Lactate	lac-D			Corticosterone	crtstrn	Potassium	4abut
L-Lactate	lac-L			Cortisone	cortsn	Orthophosphate	4hbz
L-Leucine	leu-L			Progesterone	prgstrn	(R)-3-Hydroxybutyrate	4hphac
L-Lysine	lys-L			Melatonin	melatn	Bis(Beta-Glucosyluronate)Bilirubin	4mop
L-Valine	na1			Palmitic acid	hdca	Bilirubin	56dthm
L-Alanine	nh4			Linoleic acid	lnlc	Biotin	56dura
Sodium	o2			Caprylic acid	octa	Benzoate	5adtststerone
Ammonium	o2s			Butyric acid	but	Cholate	5aop
O2	orn			Pantothenic acid	pnto_R	Citrate	5g2oxpt
Superoxide anion	pe_hs			Myristic acid	ttdca	Formate	5hoxindoa
Ornithine	pi			L-Tyrosine	tyr_L	Carbon Monoxide	5htrp
Phosphatidylethanolamine	ppa			L-Aspartic acid	asp_L	Creatine	5mthf
Phosphate	pro-L					L-Carnitine	5oxpro
Propionate	ps_hs					Cortisol	7dhchsterol
L-Proline	pyr					Cervonic Acid, C22:6 N-3	abt
phosphatidylserine	sarcs					Cytosine	ac
Pyruvate	ser-L					Chondroitin Sulfate D (GlcNac6S-Glca2S) Proteoglycan	acac
Sarcosine	so4					Hydrogen Cyanide	acald
L-Serine	tcynt					Cytidine	acetone
Sulfate	thymd					2-Deoxyadenosine	acgal
Thiocyanate	urea					Deoxycytidine	ach
Thymidine	uri					Glycochenodeoxycholate	acmana
Urea	val-L					Deoxyguanosine	acnacngal14acglcgalgluside_hs
Uridine	ala-L					3Beta-Hydroxyandrost-5-En-17-One 3-Sulfate	acnam
						Dopamine 3-O-Sulfate	acrn
						Dopamine	ade
						2-Deoxy-D-Ribose	adn
						Deoxyuridine	adrnl
						Estradiol	agm
						Estrone 3-Sulfate	ahcys
						3,5-Cyclic Guanosine Monophosphate	ahdt
						(S)-3-Aminoisobutyric Acid	aicar
						4-Hydroxyphenylacetate	akg
						(+)-Alpha-Tocopherol	alltn
						3,5-Cyclic Adenosine Monophosphate	amet
						Iv3-A-Neu5Ac,Iii4-A-Fuc-Lc4Cer	ametam
						(Gal)3 (Glc)1 (GlcNac)1 (LFuc)2 (Cer)1	andrstndn
						(Gal)6 (Glc)1 (GlcNac)3 (LFuc)2 (Cer)1	andrstrn
						Globoside	anth
						Glycocholate	arach
						Gq1Balpha	arachd
						Glutathione Disulfide (Oxidized Glutathione)	avite1
						Reduced Glutathione	bgly
						Hydrogen Peroxide	bhb
						Hexadecanoate (N-C16:0)	bildglcur
						Hexadecenoate (N-C16:1)	bilirub
						Histamine	btn
						Heparan Sulfate Proteoglycan	but
						Inosine-5'-Monophosphate	bz
						Myo-Inositol	ca24g
						Keratan Sulfate Ii (Core 2-Linked)	cala
						Linoelaidic Acid (All Trans C18:2)	camp
						Linoleate	caproic
						Alpha-Linolenate	cdca24g
						1-Acyl-Sn-Glycero-3-Phosphocholine	cdca3g
						Methanol	cgly
						Nitric Oxide	chol
						Norepinephrine	cholate
						Nervonic Acid	cholp
						9-O-Acetylated Gd3	cit
						Octadecanoate (N-C18:0)	co2
						Octadecenoate (N-C18:1)	co
						Octanoate (N-C8:0)	coke
						Phytanate	creat
						Progesterone	crm_hs
						Prostaglandin D2	crn
						Prostaglandin E2	crtn
						Prostaglandin F2Alpha	crtsl
						D-Ribitol	crvnc
						Fatty Acid Retinol	csn
						Retinol	cspg_d
						All-Trans-Retinoate	cyan
						(2S,3R)-2-Azaniumyl-3-Hydroxyoctadecyl Phosphate	cytd
						Sphingosine 1-Phosphate	dad_2
						Serotonin	dca24g
						Stearidonic Acid C18:4, N-3	dca3g
						Thiocyanate	dcmp
						Taurochenodeoxycholate	dcyt
						Thiamin Monophosphate	ddca
						Thymine	dgchol
						Timnodonic Acid C20:5, N-3	dgsn
						Testosterone	dha
						Tetradecanoic Acid	dhap
						Thromboxane A2	dhbpt
						Urate	dhea
						Vaccenic Acid	dheas
						(24S)-7Alpha,24-Dihydroxycholesterol	doco13ac
						7Alpha,27-Dihydroxycholesterol	dopa
						Xylitol	dopasf
						Iron (Fe2+)	drib
						Folate	dtmp
						D-Fructose	dttp
						D-Galactose	duri
						D-Glucosamine	dxtrn
						Maltose	egme
						Glycerol	eic21114tr
						D-Mannose	eidi1114ac
						Metanephrine	elaidcrn
						Nicotinate	estradiol
						Uridine	estriol
						Ornithine	estrones
						Propionate	etha
						Prostaglandin I2	ethamp
						Riboflavin	etoh
						Sulfate	fdp
						Oxygen	fe2
						Succinate	fmn
						Taurine	fol
						Thymidine	for
						Trehalose	forglu
						Uracil	fru
						Urea	fucacngalacglcgalgluside_hs
						N-Acetyl-D-Mannosamine	fucgalfucgalacglcgalgluside_hs
						7,8-Dihydroneopterin 3-Triphosphate	fum
						Glycerone	g3pc
						Dihydroxyacetone Phosphate	ga1_hs
						Deoxythymidine-5'-Phosphate	gal
						Deoxythymidine-5'-Triphosphate	galgalfucfucgalacglcgalacglcgal14acglcgalgluside_hs
						Orotate	galt
						5-Phospho-Alpha-D-Ribose 1-Diphosphate	gam
						Pyridoxal 5-Phosphate	gbside_hs
						Diphosphate	gchola
						Putrescine	glcn
						Carbon Dioxide	glcur
						Spermidine	gluside_hs
						Pyruvate	glx
						Acetoacetate	gly
						Butyrate	glyc
						Sulfite	glyclt
						Spermine	glypro
						2,3-Cyclic Uridine-5'-Monophosphate	gm1_hs
						3-Uridine-5'-Monophosphate	gq1balpha_hs
						Nitrite	gthox
						D-Glucuronate	gthrd
						N-Acylsphingosine	gua
						13-Docosenoate	gudac
						Tetradecenoylcarnitine(5)	h2o2
						Taurodeoxycholic Acid	h2o
						Glycylproline	h
						Leucylleucine	hca24g
						L-Prolinylglycine	hca6g
						Thiamin	hco3
						Ubiquinone-10	hdca
						Flavin Mononucleotide	hdcea
						Protoheme	hgentis
						3-(4-Hydroxyphenyl)Pyruvate	hista
						3-Methyl-2-Oxobutanoate	homoval
						3-Methyl-2-Oxopentanoate	hspg
						4-Methyl-2-Oxopentanoate	hxan
						5-Oxoprolinate	hyochol
						S-Adenosyl-L-Homocysteine	icit
						5-Amino-1-(5-Phospho-D-Ribosyl)Imidazole-4-Carboxamide	idour
						Anthranilate	im4ac
						L-Iduronate	imp
						5-Hydroxyindoleacetate	ind3ac
						Guanidinoacetic Acid	inost
						N-Carbamoyl-Beta-Alaninate	ins
						Creatinine	k
						Kynurenic Acid	ksii_core2
						3-Hydroxyanthranilate	kynate
						Quinolinic Acid	lca24g
						Choline Phosphate	lca3g
						Deoxycytidylic Acid	leuleu
						Ethanolamine Phosphate	lneldc
						Fumarate	lnlc
						Glycerophosphocholine	lnlnca
						Isocitric Acid	lpchol_hs
						Xanthine	lthstrl
						Xanthylic Acid	malt
						Orotidine 5'-Phosphate	man
						Retinal	meoh
						O-Acetylcarnitine	mepi
						O-Propanoylcarnitine	mhista
						O-Octadecanoyl-R-Carnitine	mlthf
						N-Benzoylglycinate	mma
						1-Phosphatidyl-1D-Myo-Inositol	n8aspmd
						Elaidic carnitine	na1
						2-Oxoadipate	nac
						3-(4-Hydroxyphenyl)Lactate	nh4
						3-Hydroxy-2-Methylpropanoate	no2
						3-Hydroxypropionate	no
						3-Methoxytyramine	nrpphr
						3-Ureidoisobutyrate	nrvnc
						4-Acetamidobutanoate	nwharg
						5,6-Dihydrothymine	o2
						5,6-Dihydrouracil	oaa
						5-Amino-4-Oxopentanoate	oagd3_hs
						Cholesta-5,7-Dien-3Beta-Ol	ocdca
						Allantoin	ocdcea
						S-Adenosyl-L-Methionine	octa
						Cis,Cis-11,14-Eicosadienoic Acid	orn
						N-Formimidoyl-L-Glutamate	orot5p
						Homogentisate	orot
						5Alpha-Cholest-7-En-3Beta-Ol	pac
						N-(Omega)-Hydroxyarginine	pail_hs
						Sm (D18:0/24:0), Sphingomyelin	pcrn
						Suberic Acid	pheme
						N6,N6,N6-Trimethyl-L-Lysine	phpyr
						Galactitol	phyt
						Glycolate	pi
						Indole-3-Acetate	ppa
						Oxaloacetate	ppbng
						Phenylacetate	ppi
						9E-Tetradecenoic Acid (N-C14:1)	ppp9
						Estriol	prgnlone
						Dodecanoic Acid	prgstrn
						6,7-Dihydrobiopterin	prist
						5,6,7,8-Tetrahydrobiopterin	progly
						Homovanillate	prostgd2
						N-Acetylneuraminate	prostge2
						Ethanolamine	prostgf2
						N-Acetyl-D-Galactosamine	prostgi2
						Phosphorylase-Limit Dextrin (Glycogenin-1,6{4[1,4-Glc], 4[1,4-Glc]})	prpp
						2-Oxobutanoate	ptrc
						D-Gluconate	pydam
						Guanine	pydx5p
						Hypoxanthine	pydxn
						Pyridoxine	pyr
						Pyridoxamine	q10
						4-Hydroxybenzoate	quln
						(3,4-Dihydroxyphenyl)Acetate	rbt
						Ethanol	retfa
						Acetaldehyde	retinal
						Keto-Phenylpyruvate	retinol
						Tyramine	retn
						2-Hydroxyphenylacetate	ribflv
						3-Methoxy-4-Hydroxymandelate	so3
						Glyoxylate	so4
						2-Hydroxy-3-Methyl-Valerate	sph1p
						2-Hydroxy-Isovalerate	sphgn
						2-Methyl-3-Hydroxy-Valerate	sphings
						3-Hydroxy-Glutarate	sphmyln1824_hs
						Trans,Cis,Cis-2,11,14-Eicosatrienoic Acid	sphs1p
						Agmatine	spmd
						Androst-4-Ene-3,17-Dione	sprm
						Pregnenolone	srtn
						Methylammonium	stcrn
						N(Tele)-Methylhistaminium	strdnc
						N(8)-Acetylspermidine	subeac
						Protoporphyrin	succ
						5,10-Methylenetetrahydrofolate	sucsal
						3,4-Dihydroxymandelate	taur
						Succinic Semialdehyde	tcynt
						Ecgoninium Methyl Ester	tdchola
						12 Hydroxy Arachidonic Acid	tdechola
						5-Guanidino-2-Oxopentanoic Acid	thbpt
						3Beta-Hydroxyandrost-5-En-17-One	thm
						(24S)-24-Hydroxycholesterol	thmmp
						27-Hydroxycholesterol	thym
						Porphobilinogen	thymd
						S-Adenosylmethioninamine	tmlys
						Sphingosine	tmndnc
						Imidazol-4-Ylacetate	tre
						Sphinganine	tststerone
						Pristanic Acid	ttdca
						D-Fructose 1,6-Bisphosphate	ttdcea
						Cocaine	ttdcrn
						D-Glucosyl-N-Acylsphingosine	txa2
						Gibberellin A1	tym
						Ganglioside Gm1	ura
						Cholic acid-24glucuronide, CA-24G	urate
						Chenodeoxycholic acid-24glucuronide, CDCA-24G	urea
						Chenodeoxycholic acid-3glucuronide, CDCA-3G	uri
						Deoxycholic acid-24glucuronide, CDA-24G	vacc
						Deoxycholic acid-3glucuronide, CDA-3G	xan
						Hyocholic acid-24glucuronide, HCA-24G	xmp
						Hyocholic acid-6glucuronide, HCA-6G	xol24oh
						Hyocholic acid; gamma-Muricholate	xol27oh
						Lithocholic acid-24glucuronide, CDCA-24G	xoltri24
						Lithocholic acid-3glucuronide, CDCA-3G	xoltri27
						Caproic Acid	xylt
							12hpet
							12ppd_r
							5hpet
							ala_b
							ala_d
							ala_l
							arab_l
							arg_l
							ascb_l
							asn_l
							asp_d
							asp_l
							c02356
							c02470
							c02528
							c02712
							c04805
							c05767
							c05770
							c06314
							c09642
							c10164
							c11695
							c13856
							c14771
							c14825
							c14826
							ce0074
							ce0737
							ce0955
							ce1243
							ce1918
							ce2026
							ce2028
							ce2047
							ce2049
							ce2172
							ce2176
							ce2209
							ce2510
							ce2705
							ce4890
							ce4968
							ce4970
							ce5025
							ce5629
							ce6205
							ce7082
							ce7172
							citr_l
							cys_l
							cyst_l
							dolichol_l
							gall_ce2345upt[bdg]
							glc_d
							gln_l
							glu_l
							glyc_r
							glyc_s
							hc00250
							hc00342
							hc00900
							hc01361
							hc01444
							hc02191
							hc02194
							hc02195
							hc02196
							hc02203
							hc02213
							hc02220
							hcys_l
							his_l
							hlkynr
							hom_l
							ile_l
							lac_d
							lac_l
							lcyst
							leu_l
							leuktra4
							leuktrb4
							leuktrb4wcooh
							leuktrb4woh
							leuktrd4
							leuktre4
							lhcystin
							liver_ce2345upt[bpl]
							lkynr
							lys_l
							m01966
							mal_l
							met_l
							mev_r
							n1aspmd
							nacasp
							normete_l
							phe_l
							pnto_r
							pro_l
							pser_l
							rib_d
							rtotal2
							rtotal
							ser_l
							t4hcinnm
							thr_l
							trp_l
							tyr_l
							val_l
							xyl_d
							xylu_d
							xylu_l

## Sheet: Table S4
VMH ID	Reference
12harachd	Wishart, D.S., et al., HMDB: the Human Metabolome Database. Nucleic Acids Res, 2007. 35(Database issue): p. D521-6.
12ppd_R	Wishart, D.S., et al., HMDB: the Human Metabolome Database. Nucleic Acids Res, 2007. 35(Database issue): p. D521-6.
25aics	Wishart, D.S., et al., HMDB: the Human Metabolome Database. Nucleic Acids Res, 2007. 35(Database issue): p. D521-6.
2hb	Wishart, D.S., et al., HMDB: the Human Metabolome Database. Nucleic Acids Res, 2007. 35(Database issue): p. D521-6.PMID: 24816252
2hb	Wishart, D.S., et al., HMDB: the Human Metabolome Database. Nucleic Acids Res, 2007. 35(Database issue): p. D521-6.PMID: 24816252
2mcit	Wishart, D.S., et al., HMDB: the Human Metabolome Database. Nucleic Acids Res, 2007. 35(Database issue): p. D521-6.Burgard, P., et al., Report on the practices of newborn screening for rare disorders implemented in Member States of the European Union, Candidate, Potential Candidate and EFTA Countries, in EU Tender “Evaluation of population newborn screening practices for rare disorders in Member …
2mcit	Wishart, D.S., et al., HMDB: the Human Metabolome Database. Nucleic Acids Res, 2007. 35(Database issue): p. D521-6.Burgard, P., et al., Report on the practices of newborn screening for rare disorders implemented in Member States of the European Union, Candidate, Potential Candidate and EFTA Countries, in EU Tender “Evaluation of population newborn screening practices for rare disorders in Member …
2obut	Wishart, D.S., et al., HMDB: the Human Metabolome Database. Nucleic Acids Res, 2007. 35(Database issue): p. D521-6.
34dhoxpeg	Wishart, D.S., et al., HMDB: the Human Metabolome Database. Nucleic Acids Res, 2007. 35(Database issue): p. D521-6.
34dhpha	Wishart, D.S., et al., HMDB: the Human Metabolome Database. Nucleic Acids Res, 2007. 35(Database issue): p. D521-6.
34dhphe	Wishart, D.S., et al., HMDB: the Human Metabolome Database. Nucleic Acids Res, 2007. 35(Database issue): p. D521-6.
34dhphe	Wishart, D.S., et al., HMDB: the Human Metabolome Database. Nucleic Acids Res, 2007. 35(Database issue): p. D521-6.
34hpl	Wishart, D.S., et al., HMDB: the Human Metabolome Database. Nucleic Acids Res, 2007. 35(Database issue): p. D521-6.PMID: 24816252
35cgmp	Wishart, D.S., et al., HMDB: the Human Metabolome Database. Nucleic Acids Res, 2007. 35(Database issue): p. D521-6.
35cgmp	Wishart, D.S., et al., HMDB: the Human Metabolome Database. Nucleic Acids Res, 2007. 35(Database issue): p. D521-6.
3hmp	Wishart, D.S., et al., HMDB: the Human Metabolome Database. Nucleic Acids Res, 2007. 35(Database issue): p. D521-6.http://www.metabolomicscentre.nl/
3hpp	Wishart, D.S., et al., HMDB: the Human Metabolome Database. Nucleic Acids Res, 2007. 35(Database issue): p. D521-6.Engelke, U., et al., Handbook of H-NMR spectroscopy in Inborn Errors of Metabolism Body fluid NMR apectroscopy and Brain MR spectroscopy. 3rd ed. 2014, Netherlands: Bruker.
3mlda	Wishart, D.S., et al., HMDB: the Human Metabolome Database. Nucleic Acids Res, 2007. 35(Database issue): p. D521-6.
3mlda	Wishart, D.S., et al., HMDB: the Human Metabolome Database. Nucleic Acids Res, 2007. 35(Database issue): p. D521-6.
3mob	Wishart, D.S., et al., HMDB: the Human Metabolome Database. Nucleic Acids Res, 2007. 35(Database issue): p. D521-6.Engelke, U., et al., Handbook of H-NMR spectroscopy in Inborn Errors of Metabolism Body fluid NMR apectroscopy and Brain MR spectroscopy. 3rd ed. 2014, Netherlands: Bruker.
3mob	Wishart, D.S., et al., HMDB: the Human Metabolome Database. Nucleic Acids Res, 2007. 35(Database issue): p. D521-6.Engelke, U., et al., Handbook of H-NMR spectroscopy in Inborn Errors of Metabolism Body fluid NMR apectroscopy and Brain MR spectroscopy. 3rd ed. 2014, Netherlands: Bruker.
3mop	Wishart, D.S., et al., HMDB: the Human Metabolome Database. Nucleic Acids Res, 2007. 35(Database issue): p. D521-6.Engelke, U., et al., Handbook of H-NMR spectroscopy in Inborn Errors of Metabolism Body fluid NMR apectroscopy and Brain MR spectroscopy. 3rd ed. 2014, Netherlands: Bruker.
3mop	Wishart, D.S., et al., HMDB: the Human Metabolome Database. Nucleic Acids Res, 2007. 35(Database issue): p. D521-6.Engelke, U., et al., Handbook of H-NMR spectroscopy in Inborn Errors of Metabolism Body fluid NMR apectroscopy and Brain MR spectroscopy. 3rd ed. 2014, Netherlands: Bruker.
3moxtyr	Wishart, D.S., et al., HMDB: the Human Metabolome Database. Nucleic Acids Res, 2007. 35(Database issue): p. D521-6.http://www.metabolomicscentre.nl/
3moxtyr	Wishart, D.S., et al., HMDB: the Human Metabolome Database. Nucleic Acids Res, 2007. 35(Database issue): p. D521-6.http://www.metabolomicscentre.nl/
3uib	Wishart, D.S., et al., HMDB: the Human Metabolome Database. Nucleic Acids Res, 2007. 35(Database issue): p. D521-6.Engelke, U., et al., Handbook of H-NMR spectroscopy in Inborn Errors of Metabolism Body fluid NMR apectroscopy and Brain MR spectroscopy. 3rd ed. 2014, Netherlands: Bruker.
4abut	Wishart, D.S., et al., HMDB: the Human Metabolome Database. Nucleic Acids Res, 2007. 35(Database issue): p. D521-6.http://www.metabolomicscentre.nl/
4abut	Wishart, D.S., et al., HMDB: the Human Metabolome Database. Nucleic Acids Res, 2007. 35(Database issue): p. D521-6.http://www.metabolomicscentre.nl/
4hbz	Wishart, D.S., et al., HMDB: the Human Metabolome Database. Nucleic Acids Res, 2007. 35(Database issue): p. D521-6.
4hphac	Wishart, D.S., et al., HMDB: the Human Metabolome Database. Nucleic Acids Res, 2007. 35(Database issue): p. D521-6.PMID: 24816252
4hphac	Wishart, D.S., et al., HMDB: the Human Metabolome Database. Nucleic Acids Res, 2007. 35(Database issue): p. D521-6.PMID: 24816252
4mop	Wishart, D.S., et al., HMDB: the Human Metabolome Database. Nucleic Acids Res, 2007. 35(Database issue): p. D521-6.PMID: 24816252
4mop	Wishart, D.S., et al., HMDB: the Human Metabolome Database. Nucleic Acids Res, 2007. 35(Database issue): p. D521-6.PMID: 24816252
56dthm	Wishart, D.S., et al., HMDB: the Human Metabolome Database. Nucleic Acids Res, 2007. 35(Database issue): p. D521-6.Engelke, U., et al., Handbook of H-NMR spectroscopy in Inborn Errors of Metabolism Body fluid NMR apectroscopy and Brain MR spectroscopy. 3rd ed. 2014, Netherlands: Bruker.
56dura	Wishart, D.S., et al., HMDB: the Human Metabolome Database. Nucleic Acids Res, 2007. 35(Database issue): p. D521-6.
5adtststerone	Wishart, D.S., et al., HMDB: the Human Metabolome Database. Nucleic Acids Res, 2007. 35(Database issue): p. D521-6.
5g2oxpt	Wishart, D.S., et al., HMDB: the Human Metabolome Database. Nucleic Acids Res, 2007. 35(Database issue): p. D521-6.
5hoxindoa	Wishart, D.S., et al., HMDB: the Human Metabolome Database. Nucleic Acids Res, 2007. 35(Database issue): p. D521-6.http://www.metabolomicscentre.nl/
5hoxindoa	Wishart, D.S., et al., HMDB: the Human Metabolome Database. Nucleic Acids Res, 2007. 35(Database issue): p. D521-6.http://www.metabolomicscentre.nl/
5htrp	Wishart, D.S., et al., HMDB: the Human Metabolome Database. Nucleic Acids Res, 2007. 35(Database issue): p. D521-6.http://www.metabolomicscentre.nl/
5htrp	Wishart, D.S., et al., HMDB: the Human Metabolome Database. Nucleic Acids Res, 2007. 35(Database issue): p. D521-6.http://www.metabolomicscentre.nl/
5mthf	Wishart, D.S., et al., HMDB: the Human Metabolome Database. Nucleic Acids Res, 2007. 35(Database issue): p. D521-6.
5mthf	Wishart, D.S., et al., HMDB: the Human Metabolome Database. Nucleic Acids Res, 2007. 35(Database issue): p. D521-6.
5oxpro	Wishart, D.S., et al., HMDB: the Human Metabolome Database. Nucleic Acids Res, 2007. 35(Database issue): p. D521-6.PMID: 24816252
5oxpro	Wishart, D.S., et al., HMDB: the Human Metabolome Database. Nucleic Acids Res, 2007. 35(Database issue): p. D521-6.PMID: 24816252
7dhchsterol	Wishart, D.S., et al., HMDB: the Human Metabolome Database. Nucleic Acids Res, 2007. 35(Database issue): p. D521-6.Engelke, U., et al., Handbook of H-NMR spectroscopy in Inborn Errors of Metabolism Body fluid NMR apectroscopy and Brain MR spectroscopy. 3rd ed. 2014, Netherlands: Bruker.
abt	Wishart, D.S., et al., HMDB: the Human Metabolome Database. Nucleic Acids Res, 2007. 35(Database issue): p. D521-6.Engelke, U., et al., Handbook of H-NMR spectroscopy in Inborn Errors of Metabolism Body fluid NMR apectroscopy and Brain MR spectroscopy. 3rd ed. 2014, Netherlands: Bruker.
abt	Wishart, D.S., et al., HMDB: the Human Metabolome Database. Nucleic Acids Res, 2007. 35(Database issue): p. D521-6.Engelke, U., et al., Handbook of H-NMR spectroscopy in Inborn Errors of Metabolism Body fluid NMR apectroscopy and Brain MR spectroscopy. 3rd ed. 2014, Netherlands: Bruker.
abt	Wishart, D.S., et al., HMDB: the Human Metabolome Database. Nucleic Acids Res, 2007. 35(Database issue): p. D521-6.Engelke, U., et al., Handbook of H-NMR spectroscopy in Inborn Errors of Metabolism Body fluid NMR apectroscopy and Brain MR spectroscopy. 3rd ed. 2014, Netherlands: Bruker.
ac	Wishart, D.S., et al., HMDB: the Human Metabolome Database. Nucleic Acids Res, 2007. 35(Database issue): p. D521-6.
ac	Wishart, D.S., et al., HMDB: the Human Metabolome Database. Nucleic Acids Res, 2007. 35(Database issue): p. D521-6.
acac	Wishart, D.S., et al., HMDB: the Human Metabolome Database. Nucleic Acids Res, 2007. 35(Database issue): p. D521-6.Engelke, U., et al., Handbook of H-NMR spectroscopy in Inborn Errors of Metabolism Body fluid NMR apectroscopy and Brain MR spectroscopy. 3rd ed. 2014, Netherlands: Bruker.
acac	Wishart, D.S., et al., HMDB: the Human Metabolome Database. Nucleic Acids Res, 2007. 35(Database issue): p. D521-6.Engelke, U., et al., Handbook of H-NMR spectroscopy in Inborn Errors of Metabolism Body fluid NMR apectroscopy and Brain MR spectroscopy. 3rd ed. 2014, Netherlands: Bruker.
acald	Wishart, D.S., et al., HMDB: the Human Metabolome Database. Nucleic Acids Res, 2007. 35(Database issue): p. D521-6.
acald	Wishart, D.S., et al., HMDB: the Human Metabolome Database. Nucleic Acids Res, 2007. 35(Database issue): p. D521-6.
acetone	Wishart, D.S., et al., HMDB: the Human Metabolome Database. Nucleic Acids Res, 2007. 35(Database issue): p. D521-6.Engelke, U., et al., Handbook of H-NMR spectroscopy in Inborn Errors of Metabolism Body fluid NMR apectroscopy and Brain MR spectroscopy. 3rd ed. 2014, Netherlands: Bruker.
acetone	Wishart, D.S., et al., HMDB: the Human Metabolome Database. Nucleic Acids Res, 2007. 35(Database issue): p. D521-6.Engelke, U., et al., Handbook of H-NMR spectroscopy in Inborn Errors of Metabolism Body fluid NMR apectroscopy and Brain MR spectroscopy. 3rd ed. 2014, Netherlands: Bruker.
ach	Wishart, D.S., et al., HMDB: the Human Metabolome Database. Nucleic Acids Res, 2007. 35(Database issue): p. D521-6.
ach	Wishart, D.S., et al., HMDB: the Human Metabolome Database. Nucleic Acids Res, 2007. 35(Database issue): p. D521-6.
acnam	Wishart, D.S., et al., HMDB: the Human Metabolome Database. Nucleic Acids Res, 2007. 35(Database issue): p. D521-6.Engelke, U., et al., Handbook of H-NMR spectroscopy in Inborn Errors of Metabolism Body fluid NMR apectroscopy and Brain MR spectroscopy. 3rd ed. 2014, Netherlands: Bruker.
acnam	Wishart, D.S., et al., HMDB: the Human Metabolome Database. Nucleic Acids Res, 2007. 35(Database issue): p. D521-6.Engelke, U., et al., Handbook of H-NMR spectroscopy in Inborn Errors of Metabolism Body fluid NMR apectroscopy and Brain MR spectroscopy. 3rd ed. 2014, Netherlands: Bruker.
acnam	Wishart, D.S., et al., HMDB: the Human Metabolome Database. Nucleic Acids Res, 2007. 35(Database issue): p. D521-6.Engelke, U., et al., Handbook of H-NMR spectroscopy in Inborn Errors of Metabolism Body fluid NMR apectroscopy and Brain MR spectroscopy. 3rd ed. 2014, Netherlands: Bruker.
acrn	Wishart, D.S., et al., HMDB: the Human Metabolome Database. Nucleic Acids Res, 2007. 35(Database issue): p. D521-6.PMID: 24816252
acrn	Wishart, D.S., et al., HMDB: the Human Metabolome Database. Nucleic Acids Res, 2007. 35(Database issue): p. D521-6.PMID: 24816252
ade	Wishart, D.S., et al., HMDB: the Human Metabolome Database. Nucleic Acids Res, 2007. 35(Database issue): p. D521-6.
ade	Wishart, D.S., et al., HMDB: the Human Metabolome Database. Nucleic Acids Res, 2007. 35(Database issue): p. D521-6.
adn	Wishart, D.S., et al., HMDB: the Human Metabolome Database. Nucleic Acids Res, 2007. 35(Database issue): p. D521-6.PMID: 24816252
adn	Wishart, D.S., et al., HMDB: the Human Metabolome Database. Nucleic Acids Res, 2007. 35(Database issue): p. D521-6.PMID: 24816252
adp	Wishart, D.S., et al., HMDB: the Human Metabolome Database. Nucleic Acids Res, 2007. 35(Database issue): p. D521-6.
adpac	Wishart, D.S., et al., HMDB: the Human Metabolome Database. Nucleic Acids Res, 2007. 35(Database issue): p. D521-6.http://www.metabolomicscentre.nl/
adrnl	Wishart, D.S., et al., HMDB: the Human Metabolome Database. Nucleic Acids Res, 2007. 35(Database issue): p. D521-6.http://www.metabolomicscentre.nl/
adrnl	Wishart, D.S., et al., HMDB: the Human Metabolome Database. Nucleic Acids Res, 2007. 35(Database issue): p. D521-6.http://www.metabolomicscentre.nl/
agm	Wishart, D.S., et al., HMDB: the Human Metabolome Database. Nucleic Acids Res, 2007. 35(Database issue): p. D521-6.
ahcys	Wishart, D.S., et al., HMDB: the Human Metabolome Database. Nucleic Acids Res, 2007. 35(Database issue): p. D521-6.Engelke, U., et al., Handbook of H-NMR spectroscopy in Inborn Errors of Metabolism Body fluid NMR apectroscopy and Brain MR spectroscopy. 3rd ed. 2014, Netherlands: Bruker.
ahcys	Wishart, D.S., et al., HMDB: the Human Metabolome Database. Nucleic Acids Res, 2007. 35(Database issue): p. D521-6.Engelke, U., et al., Handbook of H-NMR spectroscopy in Inborn Errors of Metabolism Body fluid NMR apectroscopy and Brain MR spectroscopy. 3rd ed. 2014, Netherlands: Bruker.
akg	Wishart, D.S., et al., HMDB: the Human Metabolome Database. Nucleic Acids Res, 2007. 35(Database issue): p. D521-6.PMID: 24816252
akg	Wishart, D.S., et al., HMDB: the Human Metabolome Database. Nucleic Acids Res, 2007. 35(Database issue): p. D521-6.PMID: 24816252
ala_B	Wishart, D.S., et al., HMDB: the Human Metabolome Database. Nucleic Acids Res, 2007. 35(Database issue): p. D521-6.Engelke, U., et al., Handbook of H-NMR spectroscopy in Inborn Errors of Metabolism Body fluid NMR apectroscopy and Brain MR spectroscopy. 3rd ed. 2014, Netherlands: Bruker.
ala_B	Wishart, D.S., et al., HMDB: the Human Metabolome Database. Nucleic Acids Res, 2007. 35(Database issue): p. D521-6.Engelke, U., et al., Handbook of H-NMR spectroscopy in Inborn Errors of Metabolism Body fluid NMR apectroscopy and Brain MR spectroscopy. 3rd ed. 2014, Netherlands: Bruker.
ala_D	Wishart, D.S., et al., HMDB: the Human Metabolome Database. Nucleic Acids Res, 2007. 35(Database issue): p. D521-6.
ala_L	Wishart, D.S., et al., HMDB: the Human Metabolome Database. Nucleic Acids Res, 2007. 35(Database issue): p. D521-6.http://www.metabolomicscentre.nl/
ala_L	Wishart, D.S., et al., HMDB: the Human Metabolome Database. Nucleic Acids Res, 2007. 35(Database issue): p. D521-6.http://www.metabolomicscentre.nl/
alltn	Wishart, D.S., et al., HMDB: the Human Metabolome Database. Nucleic Acids Res, 2007. 35(Database issue): p. D521-6.PMID: 24816252
amet	Wishart, D.S., et al., HMDB: the Human Metabolome Database. Nucleic Acids Res, 2007. 35(Database issue): p. D521-6.Engelke, U., et al., Handbook of H-NMR spectroscopy in Inborn Errors of Metabolism Body fluid NMR apectroscopy and Brain MR spectroscopy. 3rd ed. 2014, Netherlands: Bruker.
ametam	Wishart, D.S., et al., HMDB: the Human Metabolome Database. Nucleic Acids Res, 2007. 35(Database issue): p. D521-6.
amp	Wishart, D.S., et al., HMDB: the Human Metabolome Database. Nucleic Acids Res, 2007. 35(Database issue): p. D521-6.
amp	Wishart, D.S., et al., HMDB: the Human Metabolome Database. Nucleic Acids Res, 2007. 35(Database issue): p. D521-6.
andrstndn	Wishart, D.S., et al., HMDB: the Human Metabolome Database. Nucleic Acids Res, 2007. 35(Database issue): p. D521-6.PMID: 22424236
andrstrn	Wishart, D.S., et al., HMDB: the Human Metabolome Database. Nucleic Acids Res, 2007. 35(Database issue): p. D521-6.PMID: 22424236
anth	Wishart, D.S., et al., HMDB: the Human Metabolome Database. Nucleic Acids Res, 2007. 35(Database issue): p. D521-6.
anth	Wishart, D.S., et al., HMDB: the Human Metabolome Database. Nucleic Acids Res, 2007. 35(Database issue): p. D521-6.
arab_L	Wishart, D.S., et al., HMDB: the Human Metabolome Database. Nucleic Acids Res, 2007. 35(Database issue): p. D521-6.Engelke, U., et al., Handbook of H-NMR spectroscopy in Inborn Errors of Metabolism Body fluid NMR apectroscopy and Brain MR spectroscopy. 3rd ed. 2014, Netherlands: Bruker.
arab_L	Wishart, D.S., et al., HMDB: the Human Metabolome Database. Nucleic Acids Res, 2007. 35(Database issue): p. D521-6.Engelke, U., et al., Handbook of H-NMR spectroscopy in Inborn Errors of Metabolism Body fluid NMR apectroscopy and Brain MR spectroscopy. 3rd ed. 2014, Netherlands: Bruker.
arachd	Wishart, D.S., et al., HMDB: the Human Metabolome Database. Nucleic Acids Res, 2007. 35(Database issue): p. D521-6.PMID: 24816252
arachd	Wishart, D.S., et al., HMDB: the Human Metabolome Database. Nucleic Acids Res, 2007. 35(Database issue): p. D521-6.PMID: 24816252
arg_L	Wishart, D.S., et al., HMDB: the Human Metabolome Database. Nucleic Acids Res, 2007. 35(Database issue): p. D521-6.PMID: 20037589, PMID: 16032513, PMID: 21852955
arg_L	Wishart, D.S., et al., HMDB: the Human Metabolome Database. Nucleic Acids Res, 2007. 35(Database issue): p. D521-6.PMID: 20037589, PMID: 16032513, PMID: 21852955
ascb_L	Wishart, D.S., et al., HMDB: the Human Metabolome Database. Nucleic Acids Res, 2007. 35(Database issue): p. D521-6.PMID: 24816252
ascb_L	Wishart, D.S., et al., HMDB: the Human Metabolome Database. Nucleic Acids Res, 2007. 35(Database issue): p. D521-6.PMID: 24816252
asn_L	Wishart, D.S., et al., HMDB: the Human Metabolome Database. Nucleic Acids Res, 2007. 35(Database issue): p. D521-6.http://www.metabolomicscentre.nl/
asn_L	Wishart, D.S., et al., HMDB: the Human Metabolome Database. Nucleic Acids Res, 2007. 35(Database issue): p. D521-6.http://www.metabolomicscentre.nl/
asp_L	Wishart, D.S., et al., HMDB: the Human Metabolome Database. Nucleic Acids Res, 2007. 35(Database issue): p. D521-6.Engelke, U., et al., Handbook of H-NMR spectroscopy in Inborn Errors of Metabolism Body fluid NMR apectroscopy and Brain MR spectroscopy. 3rd ed. 2014, Netherlands: Bruker.
asp_L	Wishart, D.S., et al., HMDB: the Human Metabolome Database. Nucleic Acids Res, 2007. 35(Database issue): p. D521-6.Engelke, U., et al., Handbook of H-NMR spectroscopy in Inborn Errors of Metabolism Body fluid NMR apectroscopy and Brain MR spectroscopy. 3rd ed. 2014, Netherlands: Bruker.
atp	Wishart, D.S., et al., HMDB: the Human Metabolome Database. Nucleic Acids Res, 2007. 35(Database issue): p. D521-6.
atp	Wishart, D.S., et al., HMDB: the Human Metabolome Database. Nucleic Acids Res, 2007. 35(Database issue): p. D521-6.
avite1	Wishart, D.S., et al., HMDB: the Human Metabolome Database. Nucleic Acids Res, 2007. 35(Database issue): p. D521-6.PMID: 24816252
avite1	Wishart, D.S., et al., HMDB: the Human Metabolome Database. Nucleic Acids Res, 2007. 35(Database issue): p. D521-6.PMID: 24816252
bgly	Wishart, D.S., et al., HMDB: the Human Metabolome Database. Nucleic Acids Res, 2007. 35(Database issue): p. D521-6.http://www.metabolomicscentre.nl/
bhb	Wishart, D.S., et al., HMDB: the Human Metabolome Database. Nucleic Acids Res, 2007. 35(Database issue): p. D521-6.PMID: 24816252
bhb	Wishart, D.S., et al., HMDB: the Human Metabolome Database. Nucleic Acids Res, 2007. 35(Database issue): p. D521-6.PMID: 24816252
bilirub	Wishart, D.S., et al., HMDB: the Human Metabolome Database. Nucleic Acids Res, 2007. 35(Database issue): p. D521-6.PMID: 24816252
bilirub	Wishart, D.S., et al., HMDB: the Human Metabolome Database. Nucleic Acids Res, 2007. 35(Database issue): p. D521-6.PMID: 24816252
btn	Wishart, D.S., et al., HMDB: the Human Metabolome Database. Nucleic Acids Res, 2007. 35(Database issue): p. D521-6.
btn	Wishart, D.S., et al., HMDB: the Human Metabolome Database. Nucleic Acids Res, 2007. 35(Database issue): p. D521-6.
but	Wishart, D.S., et al., HMDB: the Human Metabolome Database. Nucleic Acids Res, 2007. 35(Database issue): p. D521-6.
but	Wishart, D.S., et al., HMDB: the Human Metabolome Database. Nucleic Acids Res, 2007. 35(Database issue): p. D521-6.
C02356	Wishart, D.S., et al., HMDB: the Human Metabolome Database. Nucleic Acids Res, 2007. 35(Database issue): p. D521-6.http://www.metabolomicscentre.nl/
C04805	Wishart, D.S., et al., HMDB: the Human Metabolome Database. Nucleic Acids Res, 2007. 35(Database issue): p. D521-6.http://www.metabolomicscentre.nl/
C08261	Wishart, D.S., et al., HMDB: the Human Metabolome Database. Nucleic Acids Res, 2007. 35(Database issue): p. D521-6.
C09642	Wishart, D.S., et al., HMDB: the Human Metabolome Database. Nucleic Acids Res, 2007. 35(Database issue): p. D521-6.
C10164	Wishart, D.S., et al., HMDB: the Human Metabolome Database. Nucleic Acids Res, 2007. 35(Database issue): p. D521-6.
C11695	Wishart, D.S., et al., HMDB: the Human Metabolome Database. Nucleic Acids Res, 2007. 35(Database issue): p. D521-6.http://www.metabolomicscentre.nl/
C13856	Wishart, D.S., et al., HMDB: the Human Metabolome Database. Nucleic Acids Res, 2007. 35(Database issue): p. D521-6.http://www.metabolomicscentre.nl/
C14771	Wishart, D.S., et al., HMDB: the Human Metabolome Database. Nucleic Acids Res, 2007. 35(Database issue): p. D521-6.http://www.metabolomicscentre.nl/
C14825	Wishart, D.S., et al., HMDB: the Human Metabolome Database. Nucleic Acids Res, 2007. 35(Database issue): p. D521-6.http://www.metabolomicscentre.nl/
C14826	Wishart, D.S., et al., HMDB: the Human Metabolome Database. Nucleic Acids Res, 2007. 35(Database issue): p. D521-6.http://www.metabolomicscentre.nl/
c4crn	Wishart, D.S., et al., HMDB: the Human Metabolome Database. Nucleic Acids Res, 2007. 35(Database issue): p. D521-6.PMID: 24816252
ca2	Wishart, D.S., et al., HMDB: the Human Metabolome Database. Nucleic Acids Res, 2007. 35(Database issue): p. D521-6.
cala	Wishart, D.S., et al., HMDB: the Human Metabolome Database. Nucleic Acids Res, 2007. 35(Database issue): p. D521-6.Engelke, U., et al., Handbook of H-NMR spectroscopy in Inborn Errors of Metabolism Body fluid NMR apectroscopy and Brain MR spectroscopy. 3rd ed. 2014, Netherlands: Bruker.
cala	Wishart, D.S., et al., HMDB: the Human Metabolome Database. Nucleic Acids Res, 2007. 35(Database issue): p. D521-6.Engelke, U., et al., Handbook of H-NMR spectroscopy in Inborn Errors of Metabolism Body fluid NMR apectroscopy and Brain MR spectroscopy. 3rd ed. 2014, Netherlands: Bruker.
camp	Wishart, D.S., et al., HMDB: the Human Metabolome Database. Nucleic Acids Res, 2007. 35(Database issue): p. D521-6.
camp	Wishart, D.S., et al., HMDB: the Human Metabolome Database. Nucleic Acids Res, 2007. 35(Database issue): p. D521-6.
CE0737	Wishart, D.S., et al., HMDB: the Human Metabolome Database. Nucleic Acids Res, 2007. 35(Database issue): p. D521-6.
CE0955	Wishart, D.S., et al., HMDB: the Human Metabolome Database. Nucleic Acids Res, 2007. 35(Database issue): p. D521-6.http://www.metabolomicscentre.nl/
CE1297	Wishart, D.S., et al., HMDB: the Human Metabolome Database. Nucleic Acids Res, 2007. 35(Database issue): p. D521-6.Engelke, U., et al., Handbook of H-NMR spectroscopy in Inborn Errors of Metabolism Body fluid NMR apectroscopy and Brain MR spectroscopy. 3rd ed. 2014, Netherlands: Bruker.
CE1918	Wishart, D.S., et al., HMDB: the Human Metabolome Database. Nucleic Acids Res, 2007. 35(Database issue): p. D521-6.
CE2006	Wishart, D.S., et al., HMDB: the Human Metabolome Database. Nucleic Acids Res, 2007. 35(Database issue): p. D521-6.
CE2028	Wishart, D.S., et al., HMDB: the Human Metabolome Database. Nucleic Acids Res, 2007. 35(Database issue): p. D521-6.Engelke, U., et al., Handbook of H-NMR spectroscopy in Inborn Errors of Metabolism Body fluid NMR apectroscopy and Brain MR spectroscopy. 3rd ed. 2014, Netherlands: Bruker.
CE2047	Wishart, D.S., et al., HMDB: the Human Metabolome Database. Nucleic Acids Res, 2007. 35(Database issue): p. D521-6.
CE2049	Wishart, D.S., et al., HMDB: the Human Metabolome Database. Nucleic Acids Res, 2007. 35(Database issue): p. D521-6.
CE2176	Wishart, D.S., et al., HMDB: the Human Metabolome Database. Nucleic Acids Res, 2007. 35(Database issue): p. D521-6.http://www.metabolomicscentre.nl/
CE2211	Wishart, D.S., et al., HMDB: the Human Metabolome Database. Nucleic Acids Res, 2007. 35(Database issue): p. D521-6.
CE2705	Wishart, D.S., et al., HMDB: the Human Metabolome Database. Nucleic Acids Res, 2007. 35(Database issue): p. D521-6.
CE4890	Wishart, D.S., et al., HMDB: the Human Metabolome Database. Nucleic Acids Res, 2007. 35(Database issue): p. D521-6.
CE5643	Wishart, D.S., et al., HMDB: the Human Metabolome Database. Nucleic Acids Res, 2007. 35(Database issue): p. D521-6.
CE6205	Wishart, D.S., et al., HMDB: the Human Metabolome Database. Nucleic Acids Res, 2007. 35(Database issue): p. D521-6.
cgly	Wishart, D.S., et al., HMDB: the Human Metabolome Database. Nucleic Acids Res, 2007. 35(Database issue): p. D521-6.
cgly	Wishart, D.S., et al., HMDB: the Human Metabolome Database. Nucleic Acids Res, 2007. 35(Database issue): p. D521-6.
chol	Wishart, D.S., et al., HMDB: the Human Metabolome Database. Nucleic Acids Res, 2007. 35(Database issue): p. D521-6.PMID: 24816252
chol	Wishart, D.S., et al., HMDB: the Human Metabolome Database. Nucleic Acids Res, 2007. 35(Database issue): p. D521-6.PMID: 24816252
cholp	Wishart, D.S., et al., HMDB: the Human Metabolome Database. Nucleic Acids Res, 2007. 35(Database issue): p. D521-6.
chsterol	Wishart, D.S., et al., HMDB: the Human Metabolome Database. Nucleic Acids Res, 2007. 35(Database issue): p. D521-6.PMID: 24816252
chsterol	Wishart, D.S., et al., HMDB: the Human Metabolome Database. Nucleic Acids Res, 2007. 35(Database issue): p. D521-6.PMID: 24816252
cit	Wishart, D.S., et al., HMDB: the Human Metabolome Database. Nucleic Acids Res, 2007. 35(Database issue): p. D521-6.PMID: 24816252
cit	Wishart, D.S., et al., HMDB: the Human Metabolome Database. Nucleic Acids Res, 2007. 35(Database issue): p. D521-6.PMID: 24816252
citr_L	Wishart, D.S., et al., HMDB: the Human Metabolome Database. Nucleic Acids Res, 2007. 35(Database issue): p. D521-6.Engelke, U., et al., Handbook of H-NMR spectroscopy in Inborn Errors of Metabolism Body fluid NMR apectroscopy and Brain MR spectroscopy. 3rd ed. 2014, Netherlands: Bruker.
cl	Wishart, D.S., et al., HMDB: the Human Metabolome Database. Nucleic Acids Res, 2007. 35(Database issue): p. D521-6.
cl	Wishart, D.S., et al., HMDB: the Human Metabolome Database. Nucleic Acids Res, 2007. 35(Database issue): p. D521-6.
creat	Wishart, D.S., et al., HMDB: the Human Metabolome Database. Nucleic Acids Res, 2007. 35(Database issue): p. D521-6.PMID: 24816252
creat	Wishart, D.S., et al., HMDB: the Human Metabolome Database. Nucleic Acids Res, 2007. 35(Database issue): p. D521-6.PMID: 24816252
crn	Wishart, D.S., et al., HMDB: the Human Metabolome Database. Nucleic Acids Res, 2007. 35(Database issue): p. D521-6.PMID: 24816252
crn	Wishart, D.S., et al., HMDB: the Human Metabolome Database. Nucleic Acids Res, 2007. 35(Database issue): p. D521-6.PMID: 24816252
crtn	Wishart, D.S., et al., HMDB: the Human Metabolome Database. Nucleic Acids Res, 2007. 35(Database issue): p. D521-6.PMID: 24816252
crtn	Wishart, D.S., et al., HMDB: the Human Metabolome Database. Nucleic Acids Res, 2007. 35(Database issue): p. D521-6.PMID: 24816252
crtsl	Wishart, D.S., et al., HMDB: the Human Metabolome Database. Nucleic Acids Res, 2007. 35(Database issue): p. D521-6.PMID: 24816252
crtsl	Wishart, D.S., et al., HMDB: the Human Metabolome Database. Nucleic Acids Res, 2007. 35(Database issue): p. D521-6.PMID: 24816252
crvnc	Wishart, D.S., et al., HMDB: the Human Metabolome Database. Nucleic Acids Res, 2007. 35(Database issue): p. D521-6.http://www.metabolomicscentre.nl/
crvnc	Wishart, D.S., et al., HMDB: the Human Metabolome Database. Nucleic Acids Res, 2007. 35(Database issue): p. D521-6.http://www.metabolomicscentre.nl/
cys_L	Wishart, D.S., et al., HMDB: the Human Metabolome Database. Nucleic Acids Res, 2007. 35(Database issue): p. D521-6.Engelke, U., et al., Handbook of H-NMR spectroscopy in Inborn Errors of Metabolism Body fluid NMR apectroscopy and Brain MR spectroscopy. 3rd ed. 2014, Netherlands: Bruker.
cys_L	Wishart, D.S., et al., HMDB: the Human Metabolome Database. Nucleic Acids Res, 2007. 35(Database issue): p. D521-6.Engelke, U., et al., Handbook of H-NMR spectroscopy in Inborn Errors of Metabolism Body fluid NMR apectroscopy and Brain MR spectroscopy. 3rd ed. 2014, Netherlands: Bruker.
cyst_L	Wishart, D.S., et al., HMDB: the Human Metabolome Database. Nucleic Acids Res, 2007. 35(Database issue): p. D521-6.http://www.metabolomicscentre.nl/
cyst_L	Wishart, D.S., et al., HMDB: the Human Metabolome Database. Nucleic Acids Res, 2007. 35(Database issue): p. D521-6.http://www.metabolomicscentre.nl/
cytd	Wishart, D.S., et al., HMDB: the Human Metabolome Database. Nucleic Acids Res, 2007. 35(Database issue): p. D521-6.Engelke, U., et al., Handbook of H-NMR spectroscopy in Inborn Errors of Metabolism Body fluid NMR apectroscopy and Brain MR spectroscopy. 3rd ed. 2014, Netherlands: Bruker.
cytd	Wishart, D.S., et al., HMDB: the Human Metabolome Database. Nucleic Acids Res, 2007. 35(Database issue): p. D521-6.Engelke, U., et al., Handbook of H-NMR spectroscopy in Inborn Errors of Metabolism Body fluid NMR apectroscopy and Brain MR spectroscopy. 3rd ed. 2014, Netherlands: Bruker.
ddca	Wishart, D.S., et al., HMDB: the Human Metabolome Database. Nucleic Acids Res, 2007. 35(Database issue): p. D521-6.PMID: 24816252
ddca	Wishart, D.S., et al., HMDB: the Human Metabolome Database. Nucleic Acids Res, 2007. 35(Database issue): p. D521-6.PMID: 24816252
dhbpt	Wishart, D.S., et al., HMDB: the Human Metabolome Database. Nucleic Acids Res, 2007. 35(Database issue): p. D521-6.
dhea	Wishart, D.S., et al., HMDB: the Human Metabolome Database. Nucleic Acids Res, 2007. 35(Database issue): p. D521-6.
dopa	Wishart, D.S., et al., HMDB: the Human Metabolome Database. Nucleic Acids Res, 2007. 35(Database issue): p. D521-6.http://www.metabolomicscentre.nl/
dopa	Wishart, D.S., et al., HMDB: the Human Metabolome Database. Nucleic Acids Res, 2007. 35(Database issue): p. D521-6.http://www.metabolomicscentre.nl/
duri	Wishart, D.S., et al., HMDB: the Human Metabolome Database. Nucleic Acids Res, 2007. 35(Database issue): p. D521-6.Engelke, U., et al., Handbook of H-NMR spectroscopy in Inborn Errors of Metabolism Body fluid NMR apectroscopy and Brain MR spectroscopy. 3rd ed. 2014, Netherlands: Bruker.
duri	Wishart, D.S., et al., HMDB: the Human Metabolome Database. Nucleic Acids Res, 2007. 35(Database issue): p. D521-6.Engelke, U., et al., Handbook of H-NMR spectroscopy in Inborn Errors of Metabolism Body fluid NMR apectroscopy and Brain MR spectroscopy. 3rd ed. 2014, Netherlands: Bruker.
estradiol	Wishart, D.S., et al., HMDB: the Human Metabolome Database. Nucleic Acids Res, 2007. 35(Database issue): p. D521-6.
estradiol	Wishart, D.S., et al., HMDB: the Human Metabolome Database. Nucleic Acids Res, 2007. 35(Database issue): p. D521-6.
etha	Wishart, D.S., et al., HMDB: the Human Metabolome Database. Nucleic Acids Res, 2007. 35(Database issue): p. D521-6.http://www.metabolomicscentre.nl/
etha	Wishart, D.S., et al., HMDB: the Human Metabolome Database. Nucleic Acids Res, 2007. 35(Database issue): p. D521-6.http://www.metabolomicscentre.nl/
ethamp	Wishart, D.S., et al., HMDB: the Human Metabolome Database. Nucleic Acids Res, 2007. 35(Database issue): p. D521-6.http://www.metabolomicscentre.nl/
ethamp	Wishart, D.S., et al., HMDB: the Human Metabolome Database. Nucleic Acids Res, 2007. 35(Database issue): p. D521-6.http://www.metabolomicscentre.nl/
etoh	Wishart, D.S., et al., HMDB: the Human Metabolome Database. Nucleic Acids Res, 2007. 35(Database issue): p. D521-6.
etoh	Wishart, D.S., et al., HMDB: the Human Metabolome Database. Nucleic Acids Res, 2007. 35(Database issue): p. D521-6.
fe2	Wishart, D.S., et al., HMDB: the Human Metabolome Database. Nucleic Acids Res, 2007. 35(Database issue): p. D521-6.
fe2	Wishart, D.S., et al., HMDB: the Human Metabolome Database. Nucleic Acids Res, 2007. 35(Database issue): p. D521-6.
fna5moxam	Wishart, D.S., et al., HMDB: the Human Metabolome Database. Nucleic Acids Res, 2007. 35(Database issue): p. D521-6.
fol	Wishart, D.S., et al., HMDB: the Human Metabolome Database. Nucleic Acids Res, 2007. 35(Database issue): p. D521-6.
fol	Wishart, D.S., et al., HMDB: the Human Metabolome Database. Nucleic Acids Res, 2007. 35(Database issue): p. D521-6.
for	Wishart, D.S., et al., HMDB: the Human Metabolome Database. Nucleic Acids Res, 2007. 35(Database issue): p. D521-6.
for	Wishart, D.S., et al., HMDB: the Human Metabolome Database. Nucleic Acids Res, 2007. 35(Database issue): p. D521-6.
fru	Wishart, D.S., et al., HMDB: the Human Metabolome Database. Nucleic Acids Res, 2007. 35(Database issue): p. D521-6.PMID: 24816252
fru	Wishart, D.S., et al., HMDB: the Human Metabolome Database. Nucleic Acids Res, 2007. 35(Database issue): p. D521-6.PMID: 24816252
fum	Wishart, D.S., et al., HMDB: the Human Metabolome Database. Nucleic Acids Res, 2007. 35(Database issue): p. D521-6.Engelke, U., et al., Handbook of H-NMR spectroscopy in Inborn Errors of Metabolism Body fluid NMR apectroscopy and Brain MR spectroscopy. 3rd ed. 2014, Netherlands: Bruker.
fum	Wishart, D.S., et al., HMDB: the Human Metabolome Database. Nucleic Acids Res, 2007. 35(Database issue): p. D521-6.Engelke, U., et al., Handbook of H-NMR spectroscopy in Inborn Errors of Metabolism Body fluid NMR apectroscopy and Brain MR spectroscopy. 3rd ed. 2014, Netherlands: Bruker.
g3pc	Wishart, D.S., et al., HMDB: the Human Metabolome Database. Nucleic Acids Res, 2007. 35(Database issue): p. D521-6.PMID: 24816252
g3pc	Wishart, D.S., et al., HMDB: the Human Metabolome Database. Nucleic Acids Res, 2007. 35(Database issue): p. D521-6.PMID: 24816252
gal	Wishart, D.S., et al., HMDB: the Human Metabolome Database. Nucleic Acids Res, 2007. 35(Database issue): p. D521-6.Engelke, U., et al., Handbook of H-NMR spectroscopy in Inborn Errors of Metabolism Body fluid NMR apectroscopy and Brain MR spectroscopy. 3rd ed. 2014, Netherlands: Bruker.
gal	Wishart, D.S., et al., HMDB: the Human Metabolome Database. Nucleic Acids Res, 2007. 35(Database issue): p. D521-6.Engelke, U., et al., Handbook of H-NMR spectroscopy in Inborn Errors of Metabolism Body fluid NMR apectroscopy and Brain MR spectroscopy. 3rd ed. 2014, Netherlands: Bruker.
galt	Wishart, D.S., et al., HMDB: the Human Metabolome Database. Nucleic Acids Res, 2007. 35(Database issue): p. D521-6.Engelke, U., et al., Handbook of H-NMR spectroscopy in Inborn Errors of Metabolism Body fluid NMR apectroscopy and Brain MR spectroscopy. 3rd ed. 2014, Netherlands: Bruker.
gdp	Wishart, D.S., et al., HMDB: the Human Metabolome Database. Nucleic Acids Res, 2007. 35(Database issue): p. D521-6.
gdp	Wishart, D.S., et al., HMDB: the Human Metabolome Database. Nucleic Acids Res, 2007. 35(Database issue): p. D521-6.
glc_D	Wishart, D.S., et al., HMDB: the Human Metabolome Database. Nucleic Acids Res, 2007. 35(Database issue): p. D521-6.PMID: 24816252
glc_D	Wishart, D.S., et al., HMDB: the Human Metabolome Database. Nucleic Acids Res, 2007. 35(Database issue): p. D521-6.PMID: 24816252
gln_L	Wishart, D.S., et al., HMDB: the Human Metabolome Database. Nucleic Acids Res, 2007. 35(Database issue): p. D521-6.PMID: 20037589, PMID: 16032513, PMID: 21852955
gln_L	Wishart, D.S., et al., HMDB: the Human Metabolome Database. Nucleic Acids Res, 2007. 35(Database issue): p. D521-6.PMID: 20037589, PMID: 16032513, PMID: 21852955
glu_L	Wishart, D.S., et al., HMDB: the Human Metabolome Database. Nucleic Acids Res, 2007. 35(Database issue): p. D521-6.Engelke, U., et al., Handbook of H-NMR spectroscopy in Inborn Errors of Metabolism Body fluid NMR apectroscopy and Brain MR spectroscopy. 3rd ed. 2014, Netherlands: Bruker.
glu_L	Wishart, D.S., et al., HMDB: the Human Metabolome Database. Nucleic Acids Res, 2007. 35(Database issue): p. D521-6.Engelke, U., et al., Handbook of H-NMR spectroscopy in Inborn Errors of Metabolism Body fluid NMR apectroscopy and Brain MR spectroscopy. 3rd ed. 2014, Netherlands: Bruker.
glu_L	Wishart, D.S., et al., HMDB: the Human Metabolome Database. Nucleic Acids Res, 2007. 35(Database issue): p. D521-6.Engelke, U., et al., Handbook of H-NMR spectroscopy in Inborn Errors of Metabolism Body fluid NMR apectroscopy and Brain MR spectroscopy. 3rd ed. 2014, Netherlands: Bruker.
glx	Wishart, D.S., et al., HMDB: the Human Metabolome Database. Nucleic Acids Res, 2007. 35(Database issue): p. D521-6.Burgard, P., et al., Report on the practices of newborn screening for rare disorders implemented in Member States of the European Union, Candidate, Potential Candidate and EFTA Countries, in EU Tender “Evaluation of population newborn screening practices for rare disorders in Member …
gly	Wishart, D.S., et al., HMDB: the Human Metabolome Database. Nucleic Acids Res, 2007. 35(Database issue): p. D521-6.PMID: 24816252
gly	Wishart, D.S., et al., HMDB: the Human Metabolome Database. Nucleic Acids Res, 2007. 35(Database issue): p. D521-6.PMID: 24816252
glyc	Wishart, D.S., et al., HMDB: the Human Metabolome Database. Nucleic Acids Res, 2007. 35(Database issue): p. D521-6.PMID: 24816252
glyc	Wishart, D.S., et al., HMDB: the Human Metabolome Database. Nucleic Acids Res, 2007. 35(Database issue): p. D521-6.PMID: 24816252
glyc_R	Wishart, D.S., et al., HMDB: the Human Metabolome Database. Nucleic Acids Res, 2007. 35(Database issue): p. D521-6.http://www.metabolomicscentre.nl/
glyclt	Wishart, D.S., et al., HMDB: the Human Metabolome Database. Nucleic Acids Res, 2007. 35(Database issue): p. D521-6.http://www.metabolomicscentre.nl/
glypro	Wishart, D.S., et al., HMDB: the Human Metabolome Database. Nucleic Acids Res, 2007. 35(Database issue): p. D521-6.Engelke, U., et al., Handbook of H-NMR spectroscopy in Inborn Errors of Metabolism Body fluid NMR apectroscopy and Brain MR spectroscopy. 3rd ed. 2014, Netherlands: Bruker.
gthox	Wishart, D.S., et al., HMDB: the Human Metabolome Database. Nucleic Acids Res, 2007. 35(Database issue): p. D521-6.
gthox	Wishart, D.S., et al., HMDB: the Human Metabolome Database. Nucleic Acids Res, 2007. 35(Database issue): p. D521-6.
gthrd	Wishart, D.S., et al., HMDB: the Human Metabolome Database. Nucleic Acids Res, 2007. 35(Database issue): p. D521-6.http://www.metabolomicscentre.nl/
gthrd	Wishart, D.S., et al., HMDB: the Human Metabolome Database. Nucleic Acids Res, 2007. 35(Database issue): p. D521-6.http://www.metabolomicscentre.nl/
gtp	Wishart, D.S., et al., HMDB: the Human Metabolome Database. Nucleic Acids Res, 2007. 35(Database issue): p. D521-6.
gudac	Wishart, D.S., et al., HMDB: the Human Metabolome Database. Nucleic Acids Res, 2007. 35(Database issue): p. D521-6.Engelke, U., et al., Handbook of H-NMR spectroscopy in Inborn Errors of Metabolism Body fluid NMR apectroscopy and Brain MR spectroscopy. 3rd ed. 2014, Netherlands: Bruker.
gudac	Wishart, D.S., et al., HMDB: the Human Metabolome Database. Nucleic Acids Res, 2007. 35(Database issue): p. D521-6.Engelke, U., et al., Handbook of H-NMR spectroscopy in Inborn Errors of Metabolism Body fluid NMR apectroscopy and Brain MR spectroscopy. 3rd ed. 2014, Netherlands: Bruker.
h2o	Wishart, D.S., et al., HMDB: the Human Metabolome Database. Nucleic Acids Res, 2007. 35(Database issue): p. D521-6.
h2o	Wishart, D.S., et al., HMDB: the Human Metabolome Database. Nucleic Acids Res, 2007. 35(Database issue): p. D521-6.
HC00900	Wishart, D.S., et al., HMDB: the Human Metabolome Database. Nucleic Acids Res, 2007. 35(Database issue): p. D521-6.Engelke, U., et al., Handbook of H-NMR spectroscopy in Inborn Errors of Metabolism Body fluid NMR apectroscopy and Brain MR spectroscopy. 3rd ed. 2014, Netherlands: Bruker.
HC02172	Wishart, D.S., et al., HMDB: the Human Metabolome Database. Nucleic Acids Res, 2007. 35(Database issue): p. D521-6.
hco3	Wishart, D.S., et al., HMDB: the Human Metabolome Database. Nucleic Acids Res, 2007. 35(Database issue): p. D521-6.
hcys_L	Wishart, D.S., et al., HMDB: the Human Metabolome Database. Nucleic Acids Res, 2007. 35(Database issue): p. D521-6.http://www.metabolomicscentre.nl/
hcys_L	Wishart, D.S., et al., HMDB: the Human Metabolome Database. Nucleic Acids Res, 2007. 35(Database issue): p. D521-6.http://www.metabolomicscentre.nl/
hdca	Wishart, D.S., et al., HMDB: the Human Metabolome Database. Nucleic Acids Res, 2007. 35(Database issue): p. D521-6.PMID: 24816252
hdca	Wishart, D.S., et al., HMDB: the Human Metabolome Database. Nucleic Acids Res, 2007. 35(Database issue): p. D521-6.PMID: 24816252
hdcea	Wishart, D.S., et al., HMDB: the Human Metabolome Database. Nucleic Acids Res, 2007. 35(Database issue): p. D521-6.PMID: 24816252
hdcea	Wishart, D.S., et al., HMDB: the Human Metabolome Database. Nucleic Acids Res, 2007. 35(Database issue): p. D521-6.PMID: 24816252
his_L	Wishart, D.S., et al., HMDB: the Human Metabolome Database. Nucleic Acids Res, 2007. 35(Database issue): p. D521-6.PMID: 20037589, PMID: 16032513, PMID: 21852955
his_L	Wishart, D.S., et al., HMDB: the Human Metabolome Database. Nucleic Acids Res, 2007. 35(Database issue): p. D521-6.PMID: 20037589, PMID: 16032513, PMID: 21852955
hista	Wishart, D.S., et al., HMDB: the Human Metabolome Database. Nucleic Acids Res, 2007. 35(Database issue): p. D521-6.http://www.metabolomicscentre.nl/
hista	Wishart, D.S., et al., HMDB: the Human Metabolome Database. Nucleic Acids Res, 2007. 35(Database issue): p. D521-6.http://www.metabolomicscentre.nl/
homoval	Wishart, D.S., et al., HMDB: the Human Metabolome Database. Nucleic Acids Res, 2007. 35(Database issue): p. D521-6.Burgard, P., et al., Report on the practices of newborn screening for rare disorders implemented in Member States of the European Union, Candidate, Potential Candidate and EFTA Countries, in EU Tender “Evaluation of population newborn screening practices for rare disorders in Member …
homoval	Burgard, P., et al., Report on the practices of newborn screening for rare disorders implemented in Member States of the European Union, Candidate, Potential Candidate and EFTA Countries, in EU Tender “Evaluation of population newborn screening practices for rare disorders in Member States of the European Union. 2011.
hxan	Wishart, D.S., et al., HMDB: the Human Metabolome Database. Nucleic Acids Res, 2007. 35(Database issue): p. D521-6.PMID: 24816252
hxan	Wishart, D.S., et al., HMDB: the Human Metabolome Database. Nucleic Acids Res, 2007. 35(Database issue): p. D521-6.PMID: 24816252
icit	Wishart, D.S., et al., HMDB: the Human Metabolome Database. Nucleic Acids Res, 2007. 35(Database issue): p. D521-6.http://www.metabolomicscentre.nl/
icit	Wishart, D.S., et al., HMDB: the Human Metabolome Database. Nucleic Acids Res, 2007. 35(Database issue): p. D521-6.http://www.metabolomicscentre.nl/
ile_L	Wishart, D.S., et al., HMDB: the Human Metabolome Database. Nucleic Acids Res, 2007. 35(Database issue): p. D521-6.Engelke, U., et al., Handbook of H-NMR spectroscopy in Inborn Errors of Metabolism Body fluid NMR apectroscopy and Brain MR spectroscopy. 3rd ed. 2014, Netherlands: Bruker.
ile_L	Wishart, D.S., et al., HMDB: the Human Metabolome Database. Nucleic Acids Res, 2007. 35(Database issue): p. D521-6.Engelke, U., et al., Handbook of H-NMR spectroscopy in Inborn Errors of Metabolism Body fluid NMR apectroscopy and Brain MR spectroscopy. 3rd ed. 2014, Netherlands: Bruker.
im4ac	Wishart, D.S., et al., HMDB: the Human Metabolome Database. Nucleic Acids Res, 2007. 35(Database issue): p. D521-6.
imp	Wishart, D.S., et al., HMDB: the Human Metabolome Database. Nucleic Acids Res, 2007. 35(Database issue): p. D521-6.
imp	Wishart, D.S., et al., HMDB: the Human Metabolome Database. Nucleic Acids Res, 2007. 35(Database issue): p. D521-6.
ind3ac	Wishart, D.S., et al., HMDB: the Human Metabolome Database. Nucleic Acids Res, 2007. 35(Database issue): p. D521-6.PMID: 24816252
inost	Wishart, D.S., et al., HMDB: the Human Metabolome Database. Nucleic Acids Res, 2007. 35(Database issue): p. D521-6.PMID: 24816252
inost	Wishart, D.S., et al., HMDB: the Human Metabolome Database. Nucleic Acids Res, 2007. 35(Database issue): p. D521-6.PMID: 24816252
ins	Wishart, D.S., et al., HMDB: the Human Metabolome Database. Nucleic Acids Res, 2007. 35(Database issue): p. D521-6.PMID: 24816252
ins	Wishart, D.S., et al., HMDB: the Human Metabolome Database. Nucleic Acids Res, 2007. 35(Database issue): p. D521-6.PMID: 24816252
iodine	Wishart, D.S., et al., HMDB: the Human Metabolome Database. Nucleic Acids Res, 2007. 35(Database issue): p. D521-6.
k	Wishart, D.S., et al., HMDB: the Human Metabolome Database. Nucleic Acids Res, 2007. 35(Database issue): p. D521-6.
k	Wishart, D.S., et al., HMDB: the Human Metabolome Database. Nucleic Acids Res, 2007. 35(Database issue): p. D521-6.
kynate	Wishart, D.S., et al., HMDB: the Human Metabolome Database. Nucleic Acids Res, 2007. 35(Database issue): p. D521-6.
kynate	Wishart, D.S., et al., HMDB: the Human Metabolome Database. Nucleic Acids Res, 2007. 35(Database issue): p. D521-6.
lac_D	Wishart, D.S., et al., HMDB: the Human Metabolome Database. Nucleic Acids Res, 2007. 35(Database issue): p. D521-6.PMID: 24816252
lac_L	Wishart, D.S., et al., HMDB: the Human Metabolome Database. Nucleic Acids Res, 2007. 35(Database issue): p. D521-6.Engelke, U., et al., Handbook of H-NMR spectroscopy in Inborn Errors of Metabolism Body fluid NMR apectroscopy and Brain MR spectroscopy. 3rd ed. 2014, Netherlands: Bruker.
lac_L	Wishart, D.S., et al., HMDB: the Human Metabolome Database. Nucleic Acids Res, 2007. 35(Database issue): p. D521-6.Engelke, U., et al., Handbook of H-NMR spectroscopy in Inborn Errors of Metabolism Body fluid NMR apectroscopy and Brain MR spectroscopy. 3rd ed. 2014, Netherlands: Bruker.
Lcystin	Wishart, D.S., et al., HMDB: the Human Metabolome Database. Nucleic Acids Res, 2007. 35(Database issue): p. D521-6.PMID: 24816252
Lcystin	Wishart, D.S., et al., HMDB: the Human Metabolome Database. Nucleic Acids Res, 2007. 35(Database issue): p. D521-6.PMID: 24816252
leu_L	Wishart, D.S., et al., HMDB: the Human Metabolome Database. Nucleic Acids Res, 2007. 35(Database issue): p. D521-6.Engelke, U., et al., Handbook of H-NMR spectroscopy in Inborn Errors of Metabolism Body fluid NMR apectroscopy and Brain MR spectroscopy. 3rd ed. 2014, Netherlands: Bruker.
leu_L	Wishart, D.S., et al., HMDB: the Human Metabolome Database. Nucleic Acids Res, 2007. 35(Database issue): p. D521-6.Engelke, U., et al., Handbook of H-NMR spectroscopy in Inborn Errors of Metabolism Body fluid NMR apectroscopy and Brain MR spectroscopy. 3rd ed. 2014, Netherlands: Bruker.
leuktrB4	Wishart, D.S., et al., HMDB: the Human Metabolome Database. Nucleic Acids Res, 2007. 35(Database issue): p. D521-6.http://www.metabolomicscentre.nl/
leuktrB4	Wishart, D.S., et al., HMDB: the Human Metabolome Database. Nucleic Acids Res, 2007. 35(Database issue): p. D521-6.http://www.metabolomicscentre.nl/
leuktrB4wcooh	Wishart, D.S., et al., HMDB: the Human Metabolome Database. Nucleic Acids Res, 2007. 35(Database issue): p. D521-6.http://www.metabolomicscentre.nl/
leuktrB4woh	Wishart, D.S., et al., HMDB: the Human Metabolome Database. Nucleic Acids Res, 2007. 35(Database issue): p. D521-6.
leuktrC4	Wishart, D.S., et al., HMDB: the Human Metabolome Database. Nucleic Acids Res, 2007. 35(Database issue): p. D521-6.http://www.metabolomicscentre.nl/
Lkynr	Wishart, D.S., et al., HMDB: the Human Metabolome Database. Nucleic Acids Res, 2007. 35(Database issue): p. D521-6.PMID: 24816252
Lkynr	Wishart, D.S., et al., HMDB: the Human Metabolome Database. Nucleic Acids Res, 2007. 35(Database issue): p. D521-6.PMID: 24816252
lnlc	Wishart, D.S., et al., HMDB: the Human Metabolome Database. Nucleic Acids Res, 2007. 35(Database issue): p. D521-6.PMID: 24816252
lnlc	Wishart, D.S., et al., HMDB: the Human Metabolome Database. Nucleic Acids Res, 2007. 35(Database issue): p. D521-6.PMID: 24816252
lys_L	Wishart, D.S., et al., HMDB: the Human Metabolome Database. Nucleic Acids Res, 2007. 35(Database issue): p. D521-6.Engelke, U., et al., Handbook of H-NMR spectroscopy in Inborn Errors of Metabolism Body fluid NMR apectroscopy and Brain MR spectroscopy. 3rd ed. 2014, Netherlands: Bruker.
lys_L	Wishart, D.S., et al., HMDB: the Human Metabolome Database. Nucleic Acids Res, 2007. 35(Database issue): p. D521-6.Engelke, U., et al., Handbook of H-NMR spectroscopy in Inborn Errors of Metabolism Body fluid NMR apectroscopy and Brain MR spectroscopy. 3rd ed. 2014, Netherlands: Bruker.
mag_hs	Wishart, D.S., et al., HMDB: the Human Metabolome Database. Nucleic Acids Res, 2007. 35(Database issue): p. D521-6.
mal_L	Wishart, D.S., et al., HMDB: the Human Metabolome Database. Nucleic Acids Res, 2007. 35(Database issue): p. D521-6.http://www.metabolomicscentre.nl/
mal_L	Wishart, D.S., et al., HMDB: the Human Metabolome Database. Nucleic Acids Res, 2007. 35(Database issue): p. D521-6.http://www.metabolomicscentre.nl/
man	Wishart, D.S., et al., HMDB: the Human Metabolome Database. Nucleic Acids Res, 2007. 35(Database issue): p. D521-6.PMID: 24816252
man	Wishart, D.S., et al., HMDB: the Human Metabolome Database. Nucleic Acids Res, 2007. 35(Database issue): p. D521-6.PMID: 24816252
melatn	Wishart, D.S., et al., HMDB: the Human Metabolome Database. Nucleic Acids Res, 2007. 35(Database issue): p. D521-6.
meoh	Wishart, D.S., et al., HMDB: the Human Metabolome Database. Nucleic Acids Res, 2007. 35(Database issue): p. D521-6.
meoh	Wishart, D.S., et al., HMDB: the Human Metabolome Database. Nucleic Acids Res, 2007. 35(Database issue): p. D521-6.
mepi	Wishart, D.S., et al., HMDB: the Human Metabolome Database. Nucleic Acids Res, 2007. 35(Database issue): p. D521-6.
met_L	Wishart, D.S., et al., HMDB: the Human Metabolome Database. Nucleic Acids Res, 2007. 35(Database issue): p. D521-6.PMID: 20037589, PMID: 16032513, PMID: 21852955
met_L	Wishart, D.S., et al., HMDB: the Human Metabolome Database. Nucleic Acids Res, 2007. 35(Database issue): p. D521-6.PMID: 20037589, PMID: 16032513, PMID: 21852955
mhista	Wishart, D.S., et al., HMDB: the Human Metabolome Database. Nucleic Acids Res, 2007. 35(Database issue): p. D521-6.
na1	Wishart, D.S., et al., HMDB: the Human Metabolome Database. Nucleic Acids Res, 2007. 35(Database issue): p. D521-6.
na1	Wishart, D.S., et al., HMDB: the Human Metabolome Database. Nucleic Acids Res, 2007. 35(Database issue): p. D521-6.
nac	Wishart, D.S., et al., HMDB: the Human Metabolome Database. Nucleic Acids Res, 2007. 35(Database issue): p. D521-6.
nac	Wishart, D.S., et al., HMDB: the Human Metabolome Database. Nucleic Acids Res, 2007. 35(Database issue): p. D521-6.
Nacasp	Wishart, D.S., et al., HMDB: the Human Metabolome Database. Nucleic Acids Res, 2007. 35(Database issue): p. D521-6.Engelke, U., et al., Handbook of H-NMR spectroscopy in Inborn Errors of Metabolism Body fluid NMR apectroscopy and Brain MR spectroscopy. 3rd ed. 2014, Netherlands: Bruker.
Nacasp	Wishart, D.S., et al., HMDB: the Human Metabolome Database. Nucleic Acids Res, 2007. 35(Database issue): p. D521-6.Engelke, U., et al., Handbook of H-NMR spectroscopy in Inborn Errors of Metabolism Body fluid NMR apectroscopy and Brain MR spectroscopy. 3rd ed. 2014, Netherlands: Bruker.
nh4	Wishart, D.S., et al., HMDB: the Human Metabolome Database. Nucleic Acids Res, 2007. 35(Database issue): p. D521-6.
nh4	Wishart, D.S., et al., HMDB: the Human Metabolome Database. Nucleic Acids Res, 2007. 35(Database issue): p. D521-6.
no	Wishart, D.S., et al., HMDB: the Human Metabolome Database. Nucleic Acids Res, 2007. 35(Database issue): p. D521-6.
no2	Wishart, D.S., et al., HMDB: the Human Metabolome Database. Nucleic Acids Res, 2007. 35(Database issue): p. D521-6.
no2	Wishart, D.S., et al., HMDB: the Human Metabolome Database. Nucleic Acids Res, 2007. 35(Database issue): p. D521-6.
normete_L	Wishart, D.S., et al., HMDB: the Human Metabolome Database. Nucleic Acids Res, 2007. 35(Database issue): p. D521-6.
nrpphr	Wishart, D.S., et al., HMDB: the Human Metabolome Database. Nucleic Acids Res, 2007. 35(Database issue): p. D521-6.http://www.metabolomicscentre.nl/
nrpphr	Wishart, D.S., et al., HMDB: the Human Metabolome Database. Nucleic Acids Res, 2007. 35(Database issue): p. D521-6.http://www.metabolomicscentre.nl/
oaa	Wishart, D.S., et al., HMDB: the Human Metabolome Database. Nucleic Acids Res, 2007. 35(Database issue): p. D521-6.http://www.metabolomicscentre.nl/
ocdca	Wishart, D.S., et al., HMDB: the Human Metabolome Database. Nucleic Acids Res, 2007. 35(Database issue): p. D521-6.PMID: 24816252
ocdca	Wishart, D.S., et al., HMDB: the Human Metabolome Database. Nucleic Acids Res, 2007. 35(Database issue): p. D521-6.PMID: 24816252
ocdcea	Wishart, D.S., et al., HMDB: the Human Metabolome Database. Nucleic Acids Res, 2007. 35(Database issue): p. D521-6.PMID: 24816252
ocdcea	Wishart, D.S., et al., HMDB: the Human Metabolome Database. Nucleic Acids Res, 2007. 35(Database issue): p. D521-6.PMID: 24816252
octa	Wishart, D.S., et al., HMDB: the Human Metabolome Database. Nucleic Acids Res, 2007. 35(Database issue): p. D521-6.PMID: 24816252
octa	Wishart, D.S., et al., HMDB: the Human Metabolome Database. Nucleic Acids Res, 2007. 35(Database issue): p. D521-6.PMID: 24816252
orn	Wishart, D.S., et al., HMDB: the Human Metabolome Database. Nucleic Acids Res, 2007. 35(Database issue): p. D521-6.PMID: 24816252
orn	Wishart, D.S., et al., HMDB: the Human Metabolome Database. Nucleic Acids Res, 2007. 35(Database issue): p. D521-6.PMID: 24816252
pac	Wishart, D.S., et al., HMDB: the Human Metabolome Database. Nucleic Acids Res, 2007. 35(Database issue): p. D521-6.PMID: 24816252
pcrn	Wishart, D.S., et al., HMDB: the Human Metabolome Database. Nucleic Acids Res, 2007. 35(Database issue): p. D521-6.PMID: 24816252
pcrn	Wishart, D.S., et al., HMDB: the Human Metabolome Database. Nucleic Acids Res, 2007. 35(Database issue): p. D521-6.PMID: 24816252
phe_L	Wishart, D.S., et al., HMDB: the Human Metabolome Database. Nucleic Acids Res, 2007. 35(Database issue): p. D521-6.PMID: 20037589, PMID: 16032513, PMID: 21852955
phe_L	Wishart, D.S., et al., HMDB: the Human Metabolome Database. Nucleic Acids Res, 2007. 35(Database issue): p. D521-6.PMID: 20037589, PMID: 16032513, PMID: 21852955
pnto_R	Wishart, D.S., et al., HMDB: the Human Metabolome Database. Nucleic Acids Res, 2007. 35(Database issue): p. D521-6.PMID: 24816252
pnto_R	Wishart, D.S., et al., HMDB: the Human Metabolome Database. Nucleic Acids Res, 2007. 35(Database issue): p. D521-6.PMID: 24816252
ppa	Wishart, D.S., et al., HMDB: the Human Metabolome Database. Nucleic Acids Res, 2007. 35(Database issue): p. D521-6.Engelke, U., et al., Handbook of H-NMR spectroscopy in Inborn Errors of Metabolism Body fluid NMR apectroscopy and Brain MR spectroscopy. 3rd ed. 2014, Netherlands: Bruker.
ppa	Wishart, D.S., et al., HMDB: the Human Metabolome Database. Nucleic Acids Res, 2007. 35(Database issue): p. D521-6.Engelke, U., et al., Handbook of H-NMR spectroscopy in Inborn Errors of Metabolism Body fluid NMR apectroscopy and Brain MR spectroscopy. 3rd ed. 2014, Netherlands: Bruker.
pppi	Wishart, D.S., et al., HMDB: the Human Metabolome Database. Nucleic Acids Res, 2007. 35(Database issue): p. D521-6.
prgnlone	Wishart, D.S., et al., HMDB: the Human Metabolome Database. Nucleic Acids Res, 2007. 35(Database issue): p. D521-6.PMID: 22424236
prgstrn	Wishart, D.S., et al., HMDB: the Human Metabolome Database. Nucleic Acids Res, 2007. 35(Database issue): p. D521-6.PMID: 22424236
prgstrn	Wishart, D.S., et al., HMDB: the Human Metabolome Database. Nucleic Acids Res, 2007. 35(Database issue): p. D521-6.PMID: 22424236
pro_L	Wishart, D.S., et al., HMDB: the Human Metabolome Database. Nucleic Acids Res, 2007. 35(Database issue): p. D521-6.PMID: 20037589, PMID: 16032513, PMID: 21852955
pro_L	Wishart, D.S., et al., HMDB: the Human Metabolome Database. Nucleic Acids Res, 2007. 35(Database issue): p. D521-6.PMID: 20037589, PMID: 16032513, PMID: 21852955
prostgd2	Wishart, D.S., et al., HMDB: the Human Metabolome Database. Nucleic Acids Res, 2007. 35(Database issue): p. D521-6.http://www.metabolomicscentre.nl/
prostgd2	Wishart, D.S., et al., HMDB: the Human Metabolome Database. Nucleic Acids Res, 2007. 35(Database issue): p. D521-6.http://www.metabolomicscentre.nl/
prostge2	Wishart, D.S., et al., HMDB: the Human Metabolome Database. Nucleic Acids Res, 2007. 35(Database issue): p. D521-6.http://www.metabolomicscentre.nl/
prostge2	Wishart, D.S., et al., HMDB: the Human Metabolome Database. Nucleic Acids Res, 2007. 35(Database issue): p. D521-6.http://www.metabolomicscentre.nl/
prostgf2	Wishart, D.S., et al., HMDB: the Human Metabolome Database. Nucleic Acids Res, 2007. 35(Database issue): p. D521-6.http://www.metabolomicscentre.nl/
prostgf2	Wishart, D.S., et al., HMDB: the Human Metabolome Database. Nucleic Acids Res, 2007. 35(Database issue): p. D521-6.http://www.metabolomicscentre.nl/
pser_L	Wishart, D.S., et al., HMDB: the Human Metabolome Database. Nucleic Acids Res, 2007. 35(Database issue): p. D521-6.http://www.metabolomicscentre.nl/
ptrc	Wishart, D.S., et al., HMDB: the Human Metabolome Database. Nucleic Acids Res, 2007. 35(Database issue): p. D521-6.http://www.metabolomicscentre.nl/
ptrc	Wishart, D.S., et al., HMDB: the Human Metabolome Database. Nucleic Acids Res, 2007. 35(Database issue): p. D521-6.http://www.metabolomicscentre.nl/
pydx5p	Wishart, D.S., et al., HMDB: the Human Metabolome Database. Nucleic Acids Res, 2007. 35(Database issue): p. D521-6.
pyr	Wishart, D.S., et al., HMDB: the Human Metabolome Database. Nucleic Acids Res, 2007. 35(Database issue): p. D521-6.PMID: 24816252
pyr	Wishart, D.S., et al., HMDB: the Human Metabolome Database. Nucleic Acids Res, 2007. 35(Database issue): p. D521-6.PMID: 24816252
quln	Wishart, D.S., et al., HMDB: the Human Metabolome Database. Nucleic Acids Res, 2007. 35(Database issue): p. D521-6.
quln	Wishart, D.S., et al., HMDB: the Human Metabolome Database. Nucleic Acids Res, 2007. 35(Database issue): p. D521-6.
rbt	Wishart, D.S., et al., HMDB: the Human Metabolome Database. Nucleic Acids Res, 2007. 35(Database issue): p. D521-6.Engelke, U., et al., Handbook of H-NMR spectroscopy in Inborn Errors of Metabolism Body fluid NMR apectroscopy and Brain MR spectroscopy. 3rd ed. 2014, Netherlands: Bruker.
rbt	Engelke, U., et al., Handbook of H-NMR spectroscopy in Inborn Errors of Metabolism Body fluid NMR apectroscopy and Brain MR spectroscopy. 3rd ed. 2014, Netherlands: Bruker.
rbt	Wishart, D.S., et al., HMDB: the Human Metabolome Database. Nucleic Acids Res, 2007. 35(Database issue): p. D521-6.Engelke, U., et al., Handbook of H-NMR spectroscopy in Inborn Errors of Metabolism Body fluid NMR apectroscopy and Brain MR spectroscopy. 3rd ed. 2014, Netherlands: Bruker.
rib_D	Wishart, D.S., et al., HMDB: the Human Metabolome Database. Nucleic Acids Res, 2007. 35(Database issue): p. D521-6.
rib_D	Wishart, D.S., et al., HMDB: the Human Metabolome Database. Nucleic Acids Res, 2007. 35(Database issue): p. D521-6.
ribflv	Wishart, D.S., et al., HMDB: the Human Metabolome Database. Nucleic Acids Res, 2007. 35(Database issue): p. D521-6.PMID: 24816252
ribflv	Wishart, D.S., et al., HMDB: the Human Metabolome Database. Nucleic Acids Res, 2007. 35(Database issue): p. D521-6.PMID: 24816252
sbt_D	Wishart, D.S., et al., HMDB: the Human Metabolome Database. Nucleic Acids Res, 2007. 35(Database issue): p. D521-6.
sbt_D	Wishart, D.S., et al., HMDB: the Human Metabolome Database. Nucleic Acids Res, 2007. 35(Database issue): p. D521-6.
ser_D	Wishart, D.S., et al., HMDB: the Human Metabolome Database. Nucleic Acids Res, 2007. 35(Database issue): p. D521-6.
ser_L	Wishart, D.S., et al., HMDB: the Human Metabolome Database. Nucleic Acids Res, 2007. 35(Database issue): p. D521-6.PMID: 20037589, PMID: 16032513, PMID: 21852955
ser_L	Wishart, D.S., et al., HMDB: the Human Metabolome Database. Nucleic Acids Res, 2007. 35(Database issue): p. D521-6.PMID: 20037589, PMID: 16032513, PMID: 21852955
spmd	Wishart, D.S., et al., HMDB: the Human Metabolome Database. Nucleic Acids Res, 2007. 35(Database issue): p. D521-6.http://www.metabolomicscentre.nl/
spmd	Wishart, D.S., et al., HMDB: the Human Metabolome Database. Nucleic Acids Res, 2007. 35(Database issue): p. D521-6.http://www.metabolomicscentre.nl/
sprm	Wishart, D.S., et al., HMDB: the Human Metabolome Database. Nucleic Acids Res, 2007. 35(Database issue): p. D521-6.http://www.metabolomicscentre.nl/
sprm	Wishart, D.S., et al., HMDB: the Human Metabolome Database. Nucleic Acids Res, 2007. 35(Database issue): p. D521-6.http://www.metabolomicscentre.nl/
srtn	Wishart, D.S., et al., HMDB: the Human Metabolome Database. Nucleic Acids Res, 2007. 35(Database issue): p. D521-6.PMID: 24816252
srtn	Wishart, D.S., et al., HMDB: the Human Metabolome Database. Nucleic Acids Res, 2007. 35(Database issue): p. D521-6.PMID: 24816252
subeac	Wishart, D.S., et al., HMDB: the Human Metabolome Database. Nucleic Acids Res, 2007. 35(Database issue): p. D521-6.PMID: 24816252
succ	Wishart, D.S., et al., HMDB: the Human Metabolome Database. Nucleic Acids Res, 2007. 35(Database issue): p. D521-6.Engelke, U., et al., Handbook of H-NMR spectroscopy in Inborn Errors of Metabolism Body fluid NMR apectroscopy and Brain MR spectroscopy. 3rd ed. 2014, Netherlands: Bruker.
succ	Wishart, D.S., et al., HMDB: the Human Metabolome Database. Nucleic Acids Res, 2007. 35(Database issue): p. D521-6.Engelke, U., et al., Handbook of H-NMR spectroscopy in Inborn Errors of Metabolism Body fluid NMR apectroscopy and Brain MR spectroscopy. 3rd ed. 2014, Netherlands: Bruker.
sucsal	Wishart, D.S., et al., HMDB: the Human Metabolome Database. Nucleic Acids Res, 2007. 35(Database issue): p. D521-6.
taur	Wishart, D.S., et al., HMDB: the Human Metabolome Database. Nucleic Acids Res, 2007. 35(Database issue): p. D521-6.Engelke, U., et al., Handbook of H-NMR spectroscopy in Inborn Errors of Metabolism Body fluid NMR apectroscopy and Brain MR spectroscopy. 3rd ed. 2014, Netherlands: Bruker.
taur	Wishart, D.S., et al., HMDB: the Human Metabolome Database. Nucleic Acids Res, 2007. 35(Database issue): p. D521-6.Engelke, U., et al., Handbook of H-NMR spectroscopy in Inborn Errors of Metabolism Body fluid NMR apectroscopy and Brain MR spectroscopy. 3rd ed. 2014, Netherlands: Bruker.
tcynt	Wishart, D.S., et al., HMDB: the Human Metabolome Database. Nucleic Acids Res, 2007. 35(Database issue): p. D521-6.
tcynt	Wishart, D.S., et al., HMDB: the Human Metabolome Database. Nucleic Acids Res, 2007. 35(Database issue): p. D521-6.
thbpt	Wishart, D.S., et al., HMDB: the Human Metabolome Database. Nucleic Acids Res, 2007. 35(Database issue): p. D521-6.
thm	Wishart, D.S., et al., HMDB: the Human Metabolome Database. Nucleic Acids Res, 2007. 35(Database issue): p. D521-6.
thm	Wishart, D.S., et al., HMDB: the Human Metabolome Database. Nucleic Acids Res, 2007. 35(Database issue): p. D521-6.
thmmp	Wishart, D.S., et al., HMDB: the Human Metabolome Database. Nucleic Acids Res, 2007. 35(Database issue): p. D521-6.
thmmp	Wishart, D.S., et al., HMDB: the Human Metabolome Database. Nucleic Acids Res, 2007. 35(Database issue): p. D521-6.
thmpp	Wishart, D.S., et al., HMDB: the Human Metabolome Database. Nucleic Acids Res, 2007. 35(Database issue): p. D521-6.
thr_L	Wishart, D.S., et al., HMDB: the Human Metabolome Database. Nucleic Acids Res, 2007. 35(Database issue): p. D521-6.PMID: 20037589, PMID: 16032513, PMID: 21852955
thr_L	Wishart, D.S., et al., HMDB: the Human Metabolome Database. Nucleic Acids Res, 2007. 35(Database issue): p. D521-6.PMID: 20037589, PMID: 16032513, PMID: 21852955
thym	Wishart, D.S., et al., HMDB: the Human Metabolome Database. Nucleic Acids Res, 2007. 35(Database issue): p. D521-6.Engelke, U., et al., Handbook of H-NMR spectroscopy in Inborn Errors of Metabolism Body fluid NMR apectroscopy and Brain MR spectroscopy. 3rd ed. 2014, Netherlands: Bruker.
thym	Wishart, D.S., et al., HMDB: the Human Metabolome Database. Nucleic Acids Res, 2007. 35(Database issue): p. D521-6.Engelke, U., et al., Handbook of H-NMR spectroscopy in Inborn Errors of Metabolism Body fluid NMR apectroscopy and Brain MR spectroscopy. 3rd ed. 2014, Netherlands: Bruker.
thymd	Wishart, D.S., et al., HMDB: the Human Metabolome Database. Nucleic Acids Res, 2007. 35(Database issue): p. D521-6.Engelke, U., et al., Handbook of H-NMR spectroscopy in Inborn Errors of Metabolism Body fluid NMR apectroscopy and Brain MR spectroscopy. 3rd ed. 2014, Netherlands: Bruker.
thymd	Wishart, D.S., et al., HMDB: the Human Metabolome Database. Nucleic Acids Res, 2007. 35(Database issue): p. D521-6.Engelke, U., et al., Handbook of H-NMR spectroscopy in Inborn Errors of Metabolism Body fluid NMR apectroscopy and Brain MR spectroscopy. 3rd ed. 2014, Netherlands: Bruker.
tmlys	Wishart, D.S., et al., HMDB: the Human Metabolome Database. Nucleic Acids Res, 2007. 35(Database issue): p. D521-6.http://www.metabolomicscentre.nl/
trp_L	Wishart, D.S., et al., HMDB: the Human Metabolome Database. Nucleic Acids Res, 2007. 35(Database issue): p. D521-6.PMID: 20037589, PMID: 16032513, PMID: 21852955
trp_L	Wishart, D.S., et al., HMDB: the Human Metabolome Database. Nucleic Acids Res, 2007. 35(Database issue): p. D521-6.PMID: 20037589, PMID: 16032513, PMID: 21852955
tststerone	Wishart, D.S., et al., HMDB: the Human Metabolome Database. Nucleic Acids Res, 2007. 35(Database issue): p. D521-6.PMID: 22424236
tststerone	Wishart, D.S., et al., HMDB: the Human Metabolome Database. Nucleic Acids Res, 2007. 35(Database issue): p. D521-6.PMID: 22424236
ttdca	Wishart, D.S., et al., HMDB: the Human Metabolome Database. Nucleic Acids Res, 2007. 35(Database issue): p. D521-6.PMID: 24816252
ttdca	Wishart, D.S., et al., HMDB: the Human Metabolome Database. Nucleic Acids Res, 2007. 35(Database issue): p. D521-6.PMID: 24816252
txa2	Wishart, D.S., et al., HMDB: the Human Metabolome Database. Nucleic Acids Res, 2007. 35(Database issue): p. D521-6.PMID: 22424236
tyr_L	Wishart, D.S., et al., HMDB: the Human Metabolome Database. Nucleic Acids Res, 2007. 35(Database issue): p. D521-6.PMID: 20037589, PMID: 16032513, PMID: 21852955
tyr_L	Wishart, D.S., et al., HMDB: the Human Metabolome Database. Nucleic Acids Res, 2007. 35(Database issue): p. D521-6.PMID: 20037589, PMID: 16032513, PMID: 21852955
ura	Wishart, D.S., et al., HMDB: the Human Metabolome Database. Nucleic Acids Res, 2007. 35(Database issue): p. D521-6.Engelke, U., et al., Handbook of H-NMR spectroscopy in Inborn Errors of Metabolism Body fluid NMR apectroscopy and Brain MR spectroscopy. 3rd ed. 2014, Netherlands: Bruker.
ura	Wishart, D.S., et al., HMDB: the Human Metabolome Database. Nucleic Acids Res, 2007. 35(Database issue): p. D521-6.Engelke, U., et al., Handbook of H-NMR spectroscopy in Inborn Errors of Metabolism Body fluid NMR apectroscopy and Brain MR spectroscopy. 3rd ed. 2014, Netherlands: Bruker.
urate	Wishart, D.S., et al., HMDB: the Human Metabolome Database. Nucleic Acids Res, 2007. 35(Database issue): p. D521-6.PMID: 24816252
urate	Wishart, D.S., et al., HMDB: the Human Metabolome Database. Nucleic Acids Res, 2007. 35(Database issue): p. D521-6.PMID: 24816252
urea	Wishart, D.S., et al., HMDB: the Human Metabolome Database. Nucleic Acids Res, 2007. 35(Database issue): p. D521-6.PMID: 24816252
uri	Wishart, D.S., et al., HMDB: the Human Metabolome Database. Nucleic Acids Res, 2007. 35(Database issue): p. D521-6.PMID: 24816252
uri	Wishart, D.S., et al., HMDB: the Human Metabolome Database. Nucleic Acids Res, 2007. 35(Database issue): p. D521-6.PMID: 24816252
val_L	Wishart, D.S., et al., HMDB: the Human Metabolome Database. Nucleic Acids Res, 2007. 35(Database issue): p. D521-6.PMID: 20037589, PMID: 16032513, PMID: 21852955
val_L	Wishart, D.S., et al., HMDB: the Human Metabolome Database. Nucleic Acids Res, 2007. 35(Database issue): p. D521-6.PMID: 20037589, PMID: 16032513, PMID: 21852955
xan	Wishart, D.S., et al., HMDB: the Human Metabolome Database. Nucleic Acids Res, 2007. 35(Database issue): p. D521-6.PMID: 24816252
xan	PMID: 24816252
xan	Wishart, D.S., et al., HMDB: the Human Metabolome Database. Nucleic Acids Res, 2007. 35(Database issue): p. D521-6.PMID: 24816252
xol24oh	Wishart, D.S., et al., HMDB: the Human Metabolome Database. Nucleic Acids Res, 2007. 35(Database issue): p. D521-6.
xol27oh	Wishart, D.S., et al., HMDB: the Human Metabolome Database. Nucleic Acids Res, 2007. 35(Database issue): p. D521-6.PMID: 22424236
xylt	Wishart, D.S., et al., HMDB: the Human Metabolome Database. Nucleic Acids Res, 2007. 35(Database issue): p. D521-6.
xylt	Wishart, D.S., et al., HMDB: the Human Metabolome Database. Nucleic Acids Res, 2007. 35(Database issue): p. D521-6.
xylu_D	Wishart, D.S., et al., HMDB: the Human Metabolome Database. Nucleic Acids Res, 2007. 35(Database issue): p. D521-6.
xylu_L	Wishart, D.S., et al., HMDB: the Human Metabolome Database. Nucleic Acids Res, 2007. 35(Database issue): p. D521-6.

## Sheet: Table S5
Pathway	Core reactions	Absent reactions	Notes	References
ketolysis	BDHm		beta-Hydroxybutyrate and acetoacetate utilization by the brain shows that fat products may even satisfy the central nervous systems substrate requirement, and therefore circumvent the need for gluconeogenesis and concomitant nitrogen depletion. The keto acids did fulfill the predominant energy requirement in a satisfactory fashion. Catheterization of cerebral vessels in three obese patients under…	PMID: 6061736, PMID: 23921897, George J. Siegel, R. W. A., Scott T. Brady, Donald L. Price (2006) Basic neurochemistry: molecular, cellular and medical aspects. 7th edition.Elsevier publication.
	OCOAT1m		beta-Hydroxybutyrate and acetoacetate utilization by the brain shows that fat products may even satisfy the central nervous systems substrate requirement, and therefore circumvent the need for gluconeogenesis and concomitant nitrogen depletion. The keto acids did fulfill the predominant energy requirement in a satisfactory fashion. Catheterization of cerebral vessels in three obese patients under…	PMID: 6061736, PMID: 23921897, George J. Siegel, R. W. A., Scott T. Brady, Donald L. Price (2006) Basic neurochemistry: molecular, cellular and medical aspects. 7th edition.Elsevier publication.
	ACACT1r		beta-Hydroxybutyrate and acetoacetate utilization by the brain shows that fat products may even satisfy the central nervous systems substrate requirement, and therefore circumvent the need for gluconeogenesis and concomitant nitrogen depletion. The keto acids did fulfill the predominant energy requirement in a satisfactory fashion. Catheterization of cerebral vessels in three obese patients under…	PMID: 6061736, PMID: 23921897, George J. Siegel, R. W. A., Scott T. Brady, Donald L. Price (2006) Basic neurochemistry: molecular, cellular and medical aspects. 7th edition.Elsevier publication.
malic enzyme	ME2m		presence of the malic enzyme has also been shown in brain tissue.	PMID: 13867915.
aspartate transaminase, cytosol	ASPTA		The data indicate that oxaloacetate is being utilized for the synthesis of alpha-ketoglutarate, glutamate, and glutamine at a faster rate than it is converted to aspartic acid. The shift of the C14 labeling pattern from aspartic acid toward glutamine in brain during ammonia infusion also can be seen when the balance sheet of the distribution of the fixed C14 is considered. Thus, in Experiments, i…	PMID: 13867915
glutamine synthase, cytosol	GLNS		These data demonstrate that the major mechanism for ammonia removal in the brain is the formation of glutamine, whereas in liver it is urea formation. Glutamine is the only cerebral amino acid showing a considerable increase in concentration as a result of ammonia infusion. This increase occurs without a corresponding drop in the glutamic acid concentration. With an assumed blood flow of 50 ml pe…	PMID: 13867916, George J. Siegel, R. W. A., Scott T. Brady, Donald L. Price (2006) Basic neurochemistry: molecular, cellular and medical aspects. 7th edition.Elsevier publication.
alanine transaminase, cytosol	ALATA_L		The data indicate that oxaloacetate is being utilized for the synthesis of alpha-ketoglutarate, glutamate, and glutamine at a faster rate than it is converted to aspartic acid. The shift of the C14 labeling pattern from aspartic acid toward glutamine in brain during ammonia infusion also can be seen when the balance sheet of the distribution of the fixed C14 is considered. Thus, in Experiments, i…	PMID: 13867915, George J. Siegel, R. W. A., Scott T. Brady, Donald L. Price (2006) Basic neurochemistry: molecular, cellular and medical aspects. 7th edition.Elsevier publication.
glutamate degradation, mitochondria	GLUDxm		These data demonstrate that the major mechanism for ammonia removal in the brain is the formation of glutamine, whereas in liver it is urea formation. Glutamine is the only cerebral amino acid showing a considerable increase in concentration as a result of ammonia infusion. This increase occurs without a corresponding drop in the glutamic acid concentration. With an assumed blood flow of 50 ml pe…	PMID: 13867916
	GLUDym		These data demonstrate that the major mechanism for ammonia removal in the brain is the formation of glutamine, whereas in liver it is urea formation. Glutamine is the only cerebral amino acid showing a considerable increase in concentration as a result of ammonia infusion. This increase occurs without a corresponding drop in the glutamic acid concentration. With an assumed blood flow of 50 ml pe…	PMID: 13867916
glutamine metabolism, mitochondria/ glutaminase	GLUNm		A consideration of the amounts of glutamic acid and glutamine supplied by the blood leads to the conclusion that the glutamic acid of the newly formed glutamine is synthesized in the brain.	PMID: 13867916
TCA cycle	r0384		The data indicate a significant incorporation of CO2 into the amino acids of the cerebral cortex, presumably by way of the citric acid cycle.	PMID: 13867915,
	ACONT		The data indicate a significant incorporation of CO2 into the amino acids of the cerebral cortex, presumably by way of the citric acid cycle.	PMID: 13867915,
	FUM		The data indicate a significant incorporation of CO2 into the amino acids of the cerebral cortex, presumably by way of the citric acid cycle.	PMID: 13867915,
	ICDHy		The data indicate a significant incorporation of CO2 into the amino acids of the cerebral cortex, presumably by way of the citric acid cycle.	PMID: 13867915,
	MDH		The data indicate a significant incorporation of CO2 into the amino acids of the cerebral cortex, presumably by way of the citric acid cycle.	PMID: 13867915,
	r0422		The data indicate a significant incorporation of CO2 into the amino acids of the cerebral cortex, presumably by way of the citric acid cycle.	PMID: 13867915,
	r0509		The data indicate a significant incorporation of CO2 into the amino acids of the cerebral cortex, presumably by way of the citric acid cycle.	PMID: 13867915,
	ACONTm		The data indicate a significant incorporation of CO2 into the amino acids of the cerebral cortex, presumably by way of the citric acid cycle.	PMID: 13867915,
	AKGDm		The data indicate a significant incorporation of CO2 into the amino acids of the cerebral cortex, presumably by way of the citric acid cycle.	PMID: 13867915,
	CSm		The data indicate a significant incorporation of CO2 into the amino acids of the cerebral cortex, presumably by way of the citric acid cycle.	PMID: 13867915,
	FUMm		The data indicate a significant incorporation of CO2 into the amino acids of the cerebral cortex, presumably by way of the citric acid cycle.	PMID: 13867915,
	ICDHxm		The data indicate a significant incorporation of CO2 into the amino acids of the cerebral cortex, presumably by way of the citric acid cycle.	PMID: 13867915,
	ICDHyrm		The data indicate a significant incorporation of CO2 into the amino acids of the cerebral cortex, presumably by way of the citric acid cycle.	PMID: 13867915,
	MDHm		The data indicate a significant incorporation of CO2 into the amino acids of the cerebral cortex, presumably by way of the citric acid cycle.	PMID: 13867915,
	SUCD1m		The data indicate a significant incorporation of CO2 into the amino acids of the cerebral cortex, presumably by way of the citric acid cycle.	PMID: 13867915,
	SUCOAS1m		The data indicate a significant incorporation of CO2 into the amino acids of the cerebral cortex, presumably by way of the citric acid cycle.	PMID: 13867915,
	SUCOASm		The data indicate a significant incorporation of CO2 into the amino acids of the cerebral cortex, presumably by way of the citric acid cycle.	PMID: 13867915,
	r0163		The data indicate a significant incorporation of CO2 into the amino acids of the cerebral cortex, presumably by way of the citric acid cycle.	PMID: 13867915,
	r0317		The data indicate a significant incorporation of CO2 into the amino acids of the cerebral cortex, presumably by way of the citric acid cycle.	PMID: 13867915,
	r0423		The data indicate a significant incorporation of CO2 into the amino acids of the cerebral cortex, presumably by way of the citric acid cycle.	PMID: 13867915,
	r0425		The data indicate a significant incorporation of CO2 into the amino acids of the cerebral cortex, presumably by way of the citric acid cycle.	PMID: 13867915,
	r0426		The data indicate a significant incorporation of CO2 into the amino acids of the cerebral cortex, presumably by way of the citric acid cycle.	PMID: 13867915,
	r0620		The data indicate a significant incorporation of CO2 into the amino acids of the cerebral cortex, presumably by way of the citric acid cycle.	PMID: 13867915,
	ICDHyp		The data indicate a significant incorporation of CO2 into the amino acids of the cerebral cortex, presumably by way of the citric acid cycle.	PMID: 13867915,
	r0424		The data indicate a significant incorporation of CO2 into the amino acids of the cerebral cortex, presumably by way of the citric acid cycle.	PMID: 13867915,
	MDHx		The data indicate a significant incorporation of CO2 into the amino acids of the cerebral cortex, presumably by way of the citric acid cycle.	PMID: 13867915,
glutamate degradation, cytosol/ Glutamate Decarboxylase	GLUDC		y-Aminobutyric acid isolated from the tissue, as well as that obtained after decarboxylation of glutamic acid or glutamine, has less than 5% of the counts of the precursor. These findings give additional support to the assumption that the operation of a CO2 fixation mechanism in brain is similar to that in liver.	PMID: 13867915
cysteine and CoA metabolism	r0381		In the whole brain, hypotaurine is estimated to be present at approximately 1% of taurine levels (25). Hypotaurine is postulated to function as an antioxidant, and astrocytic hypotaurine is believed to be exported to neurons, where it is converted to taurine (3, 23, 24). We report robust incorporation of radioactivity from [35S]cysteine into taurine in rat glioma cells (C6) as well as in primary …	PMID: 21778230, PMID: 15659606,
	HYPTROX		In the whole brain, hypotaurine is estimated to be present at approximately 1% of taurine levels (25). Hypotaurine is postulated to function as an antioxidant, and astrocytic hypotaurine is believed to be exported to neurons, where it is converted to taurine (3, 23, 24). We report robust incorporation of radioactivity from [35S]cysteine into taurine in rat glioma cells (C6) as well as in primary …	PMID: 21778230, PMID: 15659606,
	LCYSTCBOXL		In the whole brain, hypotaurine is estimated to be present at approximately 1% of taurine levels (25). Hypotaurine is postulated to function as an antioxidant, and astrocytic hypotaurine is believed to be exported to neurons, where it is converted to taurine (3, 23, 24). We report robust incorporation of radioactivity from [35S]cysteine into taurine in rat glioma cells (C6) as well as in primary …	PMID: 21778230, PMID: 15659606,
	r0539		In the whole brain, hypotaurine is estimated to be present at approximately 1% of taurine levels (25). Hypotaurine is postulated to function as an antioxidant, and astrocytic hypotaurine is believed to be exported to neurons, where it is converted to taurine (3, 23, 24). We report robust incorporation of radioactivity from [35S]cysteine into taurine in rat glioma cells (C6) as well as in primary …	PMID: 21778230, PMID: 15659606,
	3SALACBOXL		In the whole brain, hypotaurine is estimated to be present at approximately 1% of taurine levels (25). Hypotaurine is postulated to function as an antioxidant, and astrocytic hypotaurine is believed to be exported to neurons, where it is converted to taurine (3, 23, 24). We report robust incorporation of radioactivity from [35S]cysteine into taurine in rat glioma cells (C6) as well as in primary …	PMID: 21778230, PMID: 15659606,
	PNTEH		In the whole brain, hypotaurine is estimated to be present at approximately 1% of taurine levels (25). Hypotaurine is postulated to function as an antioxidant, and astrocytic hypotaurine is believed to be exported to neurons, where it is converted to taurine (3, 23, 24). We report robust incorporation of radioactivity from [35S]cysteine into taurine in rat glioma cells (C6) as well as in primary …	PMID: 21778230, PMID: 15659606,
	PAN4PP		In the whole brain, hypotaurine is estimated to be present at approximately 1% of taurine levels (25). Hypotaurine is postulated to function as an antioxidant, and astrocytic hypotaurine is believed to be exported to neurons, where it is converted to taurine (3, 23, 24). We report robust incorporation of radioactivity from [35S]cysteine into taurine in rat glioma cells (C6) as well as in primary …	PMID: 21778230, PMID: 15659606,
	r0578		In the whole brain, hypotaurine is estimated to be present at approximately 1% of taurine levels (25). Hypotaurine is postulated to function as an antioxidant, and astrocytic hypotaurine is believed to be exported to neurons, where it is converted to taurine (3, 23, 24). We report robust incorporation of radioactivity from [35S]cysteine into taurine in rat glioma cells (C6) as well as in primary …	PMID: 21778230, PMID: 15659606,
	r0579		In the whole brain, hypotaurine is estimated to be present at approximately 1% of taurine levels (25). Hypotaurine is postulated to function as an antioxidant, and astrocytic hypotaurine is believed to be exported to neurons, where it is converted to taurine (3, 23, 24). We report robust incorporation of radioactivity from [35S]cysteine into taurine in rat glioma cells (C6) as well as in primary …	PMID: 21778230, PMID: 15659606,
	r0614		In the whole brain, hypotaurine is estimated to be present at approximately 1% of taurine levels (25). Hypotaurine is postulated to function as an antioxidant, and astrocytic hypotaurine is believed to be exported to neurons, where it is converted to taurine (3, 23, 24). We report robust incorporation of radioactivity from [35S]cysteine into taurine in rat glioma cells (C6) as well as in primary …	PMID: 21778230, PMID: 15659606,
	r0680		In the whole brain, hypotaurine is estimated to be present at approximately 1% of taurine levels (25). Hypotaurine is postulated to function as an antioxidant, and astrocytic hypotaurine is believed to be exported to neurons, where it is converted to taurine (3, 23, 24). We report robust incorporation of radioactivity from [35S]cysteine into taurine in rat glioma cells (C6) as well as in primary …	PMID: 21778230, PMID: 15659606,
	r1010		In the whole brain, hypotaurine is estimated to be present at approximately 1% of taurine levels (25). Hypotaurine is postulated to function as an antioxidant, and astrocytic hypotaurine is believed to be exported to neurons, where it is converted to taurine (3, 23, 24). We report robust incorporation of radioactivity from [35S]cysteine into taurine in rat glioma cells (C6) as well as in primary …	PMID: 21778230, PMID: 15659606,
	r0580		In the whole brain, hypotaurine is estimated to be present at approximately 1% of taurine levels (25). Hypotaurine is postulated to function as an antioxidant, and astrocytic hypotaurine is believed to be exported to neurons, where it is converted to taurine (3, 23, 24). We report robust incorporation of radioactivity from [35S]cysteine into taurine in rat glioma cells (C6) as well as in primary …	PMID: 21778230, PMID: 15659606,
	r0679		In the whole brain, hypotaurine is estimated to be present at approximately 1% of taurine levels (25). Hypotaurine is postulated to function as an antioxidant, and astrocytic hypotaurine is believed to be exported to neurons, where it is converted to taurine (3, 23, 24). We report robust incorporation of radioactivity from [35S]cysteine into taurine in rat glioma cells (C6) as well as in primary …	PMID: 21778230, PMID: 15659606,
	CYSO		In the whole brain, hypotaurine is estimated to be present at approximately 1% of taurine levels (25). Hypotaurine is postulated to function as an antioxidant, and astrocytic hypotaurine is believed to be exported to neurons, where it is converted to taurine (3, 23, 24). We report robust incorporation of radioactivity from [35S]cysteine into taurine in rat glioma cells (C6) as well as in primary …	PMID: 21778230, PMID: 15659606,
glutathione synthesis	GLUCYS		In the whole brain, hypotaurine is estimated to be present at approximately 1% of taurine levels (25). Hypotaurine is postulated to function as an antioxidant, and astrocytic hypotaurine is believed to be exported to neurons, where it is converted to taurine (3, 23, 24). We report robust incorporation of radioactivity from [35S]cysteine into taurine in rat glioma cells (C6) as well as in primary …	PMID: 21778230, PMID: 15659606,
	GTHS		In the whole brain, hypotaurine is estimated to be present at approximately 1% of taurine levels (25). Hypotaurine is postulated to function as an antioxidant, and astrocytic hypotaurine is believed to be exported to neurons, where it is converted to taurine (3, 23, 24). We report robust incorporation of radioactivity from [35S]cysteine into taurine in rat glioma cells (C6) as well as in primary …	PMID: 21778230, PMID: 15659606,
transport extracellular, sodium potassium antiport/ Na+/K+ AtPase	NaKt		Bicarbonate and other ions are actively secreted across the blood brain barrier (BBB) (34,35). (Na1/K1)-ATPase is present in the abluminal membrane (36). One of the most important functions of (Na1/ K1)-ATPase is to maintain the high concentration gradient of Na1 (external . internal) so Na1-dependent transport can occur.	PMID: 16365086
isoleucine metabolism	ILETAm		As in skeletal muscle, there is substantial uptake of BCAAs into the brain in rats (58), and, in humans, the cerebral arteriovenous difference for leucine exceeds that of other amino acids. The BCATm is expressed ubiquitously, whereas the cytosolic isozyme BCATc is found almost exclusively in nervous tissue. This suggests that alanine synthesis from glutamate occurs in mitochondria in skeletal mu…	PMID: 15930469, PMID: 16365086,
	ILEt5m		As in skeletal muscle, there is substantial uptake of BCAAs into the brain in rats (58), and, in humans, the cerebral arteriovenous difference for leucine exceeds that of other amino acids. The BCATm is expressed ubiquitously, whereas the cytosolic isozyme BCATc is found almost exclusively in nervous tissue. This suggests that alanine synthesis from glutamate occurs in mitochondria in skeletal mu…	PMID: 15930469, PMID: 16365086,
	OIVD3m		As in skeletal muscle, there is substantial uptake of BCAAs into the brain in rats (58), and, in humans, the cerebral arteriovenous difference for leucine exceeds that of other amino acids. The BCATm is expressed ubiquitously, whereas the cytosolic isozyme BCATc is found almost exclusively in nervous tissue. This suggests that alanine synthesis from glutamate occurs in mitochondria in skeletal mu…	PMID: 15930469, PMID: 16365086,
	ILETA		As in skeletal muscle, there is substantial uptake of BCAAs into the brain in rats (58), and, in humans, the cerebral arteriovenous difference for leucine exceeds that of other amino acids. The BCATm is expressed ubiquitously, whereas the cytosolic isozyme BCATc is found almost exclusively in nervous tissue. This suggests that alanine synthesis from glutamate occurs in mitochondria in skeletal mu…	PMID: 15930469, PMID: 16365086,
leucine metabolism	LEUt5m		As in skeletal muscle, there is substantial uptake of BCAAs into the brain in rats (58), and, in humans, the cerebral arteriovenous difference for leucine exceeds that of other amino acids. The BCATm is expressed ubiquitously, whereas the cytosolic isozyme BCATc is found almost exclusively in nervous tissue. This suggests that alanine synthesis from glutamate occurs in mitochondria in skeletal mu…	PMID: 15930469, PMID: 16365086,
	LEUTAm		As in skeletal muscle, there is substantial uptake of BCAAs into the brain in rats (58), and, in humans, the cerebral arteriovenous difference for leucine exceeds that of other amino acids. The BCATm is expressed ubiquitously, whereas the cytosolic isozyme BCATc is found almost exclusively in nervous tissue. This suggests that alanine synthesis from glutamate occurs in mitochondria in skeletal mu…	PMID: 15930469, PMID: 16365086,
	OIVD1m		As in skeletal muscle, there is substantial uptake of BCAAs into the brain in rats (58), and, in humans, the cerebral arteriovenous difference for leucine exceeds that of other amino acids. The BCATm is expressed ubiquitously, whereas the cytosolic isozyme BCATc is found almost exclusively in nervous tissue. This suggests that alanine synthesis from glutamate occurs in mitochondria in skeletal mu…	PMID: 15930469, PMID: 16365086,
	LEUTA		As in skeletal muscle, there is substantial uptake of BCAAs into the brain in rats (58), and, in humans, the cerebral arteriovenous difference for leucine exceeds that of other amino acids. The BCATm is expressed ubiquitously, whereas the cytosolic isozyme BCATc is found almost exclusively in nervous tissue. This suggests that alanine synthesis from glutamate occurs in mitochondria in skeletal mu…	PMID: 15930469, PMID: 16365086,
valine metabolism	VALt5m		As in skeletal muscle, there is substantial uptake of BCAAs into the brain in rats (58), and, in humans, the cerebral arteriovenous difference for leucine exceeds that of other amino acids. The BCATm is expressed ubiquitously, whereas the cytosolic isozyme BCATc is found almost exclusively in nervous tissue. This suggests that alanine synthesis from glutamate occurs in mitochondria in skeletal mu…	PMID: 15930469, PMID: 16365086,
	VALTAm		As in skeletal muscle, there is substantial uptake of BCAAs into the brain in rats (58), and, in humans, the cerebral arteriovenous difference for leucine exceeds that of other amino acids. The BCATm is expressed ubiquitously, whereas the cytosolic isozyme BCATc is found almost exclusively in nervous tissue. This suggests that alanine synthesis from glutamate occurs in mitochondria in skeletal mu…	PMID: 15930469, PMID: 16365086,
	VALTA		As in skeletal muscle, there is substantial uptake of BCAAs into the brain in rats (58), and, in humans, the cerebral arteriovenous difference for leucine exceeds that of other amino acids. The BCATm is expressed ubiquitously, whereas the cytosolic isozyme BCATc is found almost exclusively in nervous tissue. This suggests that alanine synthesis from glutamate occurs in mitochondria in skeletal mu…	PMID: 15930469, PMID: 16365086,
	OIVD2m		As in skeletal muscle, there is substantial uptake of BCAAs into the brain in rats (58), and, in humans, the cerebral arteriovenous difference for leucine exceeds that of other amino acids. The BCATm is expressed ubiquitously, whereas the cytosolic isozyme BCATc is found almost exclusively in nervous tissue. This suggests that alanine synthesis from glutamate occurs in mitochondria in skeletal mu…	PMID: 15930469, PMID: 16365086,
glycolysis	ENO			George J. Siegel, R. W. A., Scott T. Brady, Donald L. Price (2006) Basic neurochemistry: molecular, cellular and medical aspects. 7th edition.Elsevier publication.
	FBA			George J. Siegel, R. W. A., Scott T. Brady, Donald L. Price (2006) Basic neurochemistry: molecular, cellular and medical aspects. 7th edition.Elsevier publication.
	GAPD			George J. Siegel, R. W. A., Scott T. Brady, Donald L. Price (2006) Basic neurochemistry: molecular, cellular and medical aspects. 7th edition.Elsevier publication.
	HEX1			George J. Siegel, R. W. A., Scott T. Brady, Donald L. Price (2006) Basic neurochemistry: molecular, cellular and medical aspects. 7th edition.Elsevier publication.
	PGI			George J. Siegel, R. W. A., Scott T. Brady, Donald L. Price (2006) Basic neurochemistry: molecular, cellular and medical aspects. 7th edition.Elsevier publication.
	PGK			George J. Siegel, R. W. A., Scott T. Brady, Donald L. Price (2006) Basic neurochemistry: molecular, cellular and medical aspects. 7th edition.Elsevier publication.
	PGM			George J. Siegel, R. W. A., Scott T. Brady, Donald L. Price (2006) Basic neurochemistry: molecular, cellular and medical aspects. 7th edition.Elsevier publication.
	PYK			George J. Siegel, R. W. A., Scott T. Brady, Donald L. Price (2006) Basic neurochemistry: molecular, cellular and medical aspects. 7th edition.Elsevier publication.
	TPI			George J. Siegel, R. W. A., Scott T. Brady, Donald L. Price (2006) Basic neurochemistry: molecular, cellular and medical aspects. 7th edition.Elsevier publication.
	r0122			George J. Siegel, R. W. A., Scott T. Brady, Donald L. Price (2006) Basic neurochemistry: molecular, cellular and medical aspects. 7th edition.Elsevier publication.
	r0153			George J. Siegel, R. W. A., Scott T. Brady, Donald L. Price (2006) Basic neurochemistry: molecular, cellular and medical aspects. 7th edition.Elsevier publication.
	r0165			George J. Siegel, R. W. A., Scott T. Brady, Donald L. Price (2006) Basic neurochemistry: molecular, cellular and medical aspects. 7th edition.Elsevier publication.
	r0280			George J. Siegel, R. W. A., Scott T. Brady, Donald L. Price (2006) Basic neurochemistry: molecular, cellular and medical aspects. 7th edition.Elsevier publication.
	r0354			George J. Siegel, R. W. A., Scott T. Brady, Donald L. Price (2006) Basic neurochemistry: molecular, cellular and medical aspects. 7th edition.Elsevier publication.
	r0355			George J. Siegel, R. W. A., Scott T. Brady, Donald L. Price (2006) Basic neurochemistry: molecular, cellular and medical aspects. 7th edition.Elsevier publication.
	r0413			George J. Siegel, R. W. A., Scott T. Brady, Donald L. Price (2006) Basic neurochemistry: molecular, cellular and medical aspects. 7th edition.Elsevier publication.
	RE2954C			George J. Siegel, R. W. A., Scott T. Brady, Donald L. Price (2006) Basic neurochemistry: molecular, cellular and medical aspects. 7th edition.Elsevier publication.
	ACYP			George J. Siegel, R. W. A., Scott T. Brady, Donald L. Price (2006) Basic neurochemistry: molecular, cellular and medical aspects. 7th edition.Elsevier publication.
	r0173			George J. Siegel, R. W. A., Scott T. Brady, Donald L. Price (2006) Basic neurochemistry: molecular, cellular and medical aspects. 7th edition.Elsevier publication.
	LDH_L			George J. Siegel, R. W. A., Scott T. Brady, Donald L. Price (2006) Basic neurochemistry: molecular, cellular and medical aspects. 7th edition.Elsevier publication.
HMP shunt	G6PDH2r			George J. Siegel, R. W. A., Scott T. Brady, Donald L. Price (2006) Basic neurochemistry: molecular, cellular and medical aspects. 7th edition.Elsevier publication.
	GND			George J. Siegel, R. W. A., Scott T. Brady, Donald L. Price (2006) Basic neurochemistry: molecular, cellular and medical aspects. 7th edition.Elsevier publication.
	PGL			George J. Siegel, R. W. A., Scott T. Brady, Donald L. Price (2006) Basic neurochemistry: molecular, cellular and medical aspects. 7th edition.Elsevier publication.
	PPM			George J. Siegel, R. W. A., Scott T. Brady, Donald L. Price (2006) Basic neurochemistry: molecular, cellular and medical aspects. 7th edition.Elsevier publication.
	PRPPS			George J. Siegel, R. W. A., Scott T. Brady, Donald L. Price (2006) Basic neurochemistry: molecular, cellular and medical aspects. 7th edition.Elsevier publication.
	RBK			George J. Siegel, R. W. A., Scott T. Brady, Donald L. Price (2006) Basic neurochemistry: molecular, cellular and medical aspects. 7th edition.Elsevier publication.
	RBK_D			George J. Siegel, R. W. A., Scott T. Brady, Donald L. Price (2006) Basic neurochemistry: molecular, cellular and medical aspects. 7th edition.Elsevier publication.
	RPE			George J. Siegel, R. W. A., Scott T. Brady, Donald L. Price (2006) Basic neurochemistry: molecular, cellular and medical aspects. 7th edition.Elsevier publication.
	RPI			George J. Siegel, R. W. A., Scott T. Brady, Donald L. Price (2006) Basic neurochemistry: molecular, cellular and medical aspects. 7th edition.Elsevier publication.
	TALA			George J. Siegel, R. W. A., Scott T. Brady, Donald L. Price (2006) Basic neurochemistry: molecular, cellular and medical aspects. 7th edition.Elsevier publication.
	TKT1			George J. Siegel, R. W. A., Scott T. Brady, Donald L. Price (2006) Basic neurochemistry: molecular, cellular and medical aspects. 7th edition.Elsevier publication.
	TKT2			George J. Siegel, R. W. A., Scott T. Brady, Donald L. Price (2006) Basic neurochemistry: molecular, cellular and medical aspects. 7th edition.Elsevier publication.
	r0407			George J. Siegel, R. W. A., Scott T. Brady, Donald L. Price (2006) Basic neurochemistry: molecular, cellular and medical aspects. 7th edition.Elsevier publication.
	r0408			George J. Siegel, R. W. A., Scott T. Brady, Donald L. Price (2006) Basic neurochemistry: molecular, cellular and medical aspects. 7th edition.Elsevier publication.
	r0409			George J. Siegel, R. W. A., Scott T. Brady, Donald L. Price (2006) Basic neurochemistry: molecular, cellular and medical aspects. 7th edition.Elsevier publication.
	G6PDH2c			George J. Siegel, R. W. A., Scott T. Brady, Donald L. Price (2006) Basic neurochemistry: molecular, cellular and medical aspects. 7th edition.Elsevier publication.
	GNDc			George J. Siegel, R. W. A., Scott T. Brady, Donald L. Price (2006) Basic neurochemistry: molecular, cellular and medical aspects. 7th edition.Elsevier publication.
	PGLc			George J. Siegel, R. W. A., Scott T. Brady, Donald L. Price (2006) Basic neurochemistry: molecular, cellular and medical aspects. 7th edition.Elsevier publication.
	RPEc			George J. Siegel, R. W. A., Scott T. Brady, Donald L. Price (2006) Basic neurochemistry: molecular, cellular and medical aspects. 7th edition.Elsevier publication.
	RE0124C			George J. Siegel, R. W. A., Scott T. Brady, Donald L. Price (2006) Basic neurochemistry: molecular, cellular and medical aspects. 7th edition.Elsevier publication.
	G6PDH2rer			George J. Siegel, R. W. A., Scott T. Brady, Donald L. Price (2006) Basic neurochemistry: molecular, cellular and medical aspects. 7th edition.Elsevier publication.
	GNDer			George J. Siegel, R. W. A., Scott T. Brady, Donald L. Price (2006) Basic neurochemistry: molecular, cellular and medical aspects. 7th edition.Elsevier publication.
	PGLer			George J. Siegel, R. W. A., Scott T. Brady, Donald L. Price (2006) Basic neurochemistry: molecular, cellular and medical aspects. 7th edition.Elsevier publication.
	r0249			George J. Siegel, R. W. A., Scott T. Brady, Donald L. Price (2006) Basic neurochemistry: molecular, cellular and medical aspects. 7th edition.Elsevier publication.
	G6PDH1rer			George J. Siegel, R. W. A., Scott T. Brady, Donald L. Price (2006) Basic neurochemistry: molecular, cellular and medical aspects. 7th edition.Elsevier publication.
octanoate oxidation	FAOXC80		In contrast to long-chain fatty acids, the medium-chain octanoic acid is rapidly oxidized in the brain. However, cerebral octanoate oxidation seems to be a special case for two reasons: First, octanoate oxidation mostly takes place in astrocytes, and, in contrast to long-chain fatty acids, its oxidation by mitochondria is not under the control of the acylcarnitine/ carnitine antiporter. These dat…	PMID: 12843297, PMID: 23921897.
	FAOXC8C6m			PMID: 12843297, PMID: 23921897.
	FAOXC8C6x			PMID: 12843297, PMID: 23921897.
	OCTAt			PMID: 12843297, PMID: 23921897.
	FACOAL80i			PMID: 12843297, PMID: 23921897.
	C80CPT1			PMID: 12843297, PMID: 23921897.
	OCCOAtm			PMID: 12843297, PMID: 23921897.
	OCCOAtx			PMID: 12843297, PMID: 23921897.
fatty acid synthesis & elongation	ACCOACm		There is biosynthesis of long chain fatty acids by subcellular particles in mature brain. The elongation pathway is also present in both microsomal and mitochondrial fractions of rat brain. When these systems were incubated with malonyl-CoA or acetyl-CoA in the presence of ATP, the reaction products, a variety of saturated and polyunsaturated fatty acids, and their decarboxylation ratios of 1: 1.…	PMID: 4298514, PMID: 11478374,
	r0634			PMID: 4298514, PMID: 11478374,
	FAEL204			PMID: 4298514, PMID: 11478374,
	FAEL205			PMID: 4298514, PMID: 11478374,
	FAEL183			PMID: 4298514, PMID: 11478374,
	r0638			PMID: 4298514, PMID: 11478374,
	FAEL184			PMID: 4298514, PMID: 11478374,
	r0511			PMID: 4298514, PMID: 11478374,
	r0633			PMID: 4298514, PMID: 11478374,
	r0510			PMID: 4298514, PMID: 11478374,
	r0309			PMID: 4298514, PMID: 11478374,
	r0652			PMID: 4298514, PMID: 11478374,
	RE3162C			PMID: 4298514, PMID: 11478374,
	RE3162R			PMID: 4298514, PMID: 11478374,
	RE3238C			PMID: 4298514, PMID: 11478374,
	RE3229C			PMID: 4298514, PMID: 11478374,
	RE3229R			PMID: 4298514, PMID: 11478374,
	RE3239C			PMID: 4298514, PMID: 11478374,
	RE3237C			PMID: 4298514, PMID: 11478374,
	RE3153C			PMID: 4298514, PMID: 11478374,
	RE3153R			PMID: 4298514, PMID: 11478374,
	RE3122C			PMID: 4298514, PMID: 11478374,
	RE3122R			PMID: 4298514, PMID: 11478374,
	RE3126C			PMID: 4298514, PMID: 11478374,
	RE3126R			PMID: 4298514, PMID: 11478374,
	RE3155C			PMID: 4298514, PMID: 11478374,
	RE3155R			PMID: 4298514, PMID: 11478374,
	RE3166C			PMID: 4298514, PMID: 11478374,
	RE3166R			PMID: 4298514, PMID: 11478374,
	RE3227C			PMID: 4298514, PMID: 11478374,
	RE3227R			PMID: 4298514, PMID: 11478374,
	RE3230C			PMID: 4298514, PMID: 11478374,
	RE3230R			PMID: 4298514, PMID: 11478374,
	RE3112C			PMID: 4298514, PMID: 11478374,
	RE3112R			PMID: 4298514, PMID: 11478374,
	RE3234C			PMID: 4298514, PMID: 11478374,
	RE3234R			PMID: 4298514, PMID: 11478374,
	RE3242C			PMID: 4298514, PMID: 11478374,
	RE3242R			PMID: 4298514, PMID: 11478374,
	RE3171C			PMID: 4298514, PMID: 11478374,
	RE3171R			PMID: 4298514, PMID: 11478374,
	RE3121C			PMID: 4298514, PMID: 11478374,
	RE3121R			PMID: 4298514, PMID: 11478374,
	RE3152C			PMID: 4298514, PMID: 11478374,
	RE3152R			PMID: 4298514, PMID: 11478374,
	RE3154C			PMID: 4298514, PMID: 11478374,
	RE3175C			PMID: 4298514, PMID: 11478374,
	RE3154R			PMID: 4298514, PMID: 11478374,
	RE3175R			PMID: 4298514, PMID: 11478374,
	RE3125C			PMID: 4298514, PMID: 11478374,
	RE3125R			PMID: 4298514, PMID: 11478374,
	RE3444C			PMID: 4298514, PMID: 11478374,
	RE3444M			PMID: 4298514, PMID: 11478374,
	RE3444X			PMID: 4298514, PMID: 11478374,
	RE0570C			PMID: 4298514, PMID: 11478374,
	RE0566C			PMID: 4298514, PMID: 11478374,
	RE0581C			PMID: 4298514, PMID: 11478374,
	RE0581R			PMID: 4298514, PMID: 11478374,
	r1314			PMID: 4298514, PMID: 11478374,
	RE0574C			PMID: 4298514, PMID: 11478374,
	RE3110C			PMID: 4298514, PMID: 11478374,
	RE3110R			PMID: 4298514, PMID: 11478374,
	RE3339C			PMID: 4298514, PMID: 11478374,
	RE3343C			PMID: 4298514, PMID: 11478374,
	RE3339M			PMID: 4298514, PMID: 11478374,
	RE3343M			PMID: 4298514, PMID: 11478374,
	RE3339X			PMID: 4298514, PMID: 11478374,
	RE3343X			PMID: 4298514, PMID: 11478374,
	RE3224C			PMID: 4298514, PMID: 11478374,
	RE3224R			PMID: 4298514, PMID: 11478374,
	RE3225C			PMID: 4298514, PMID: 11478374,
	RE3225R			PMID: 4298514, PMID: 11478374,
	RE3124C			PMID: 4298514, PMID: 11478374,
	RE3148C			PMID: 4298514, PMID: 11478374,
	RE3124R			PMID: 4298514, PMID: 11478374,
	RE3148R			PMID: 4298514, PMID: 11478374,
	RE3226C			PMID: 4298514, PMID: 11478374,
	RE3226R			PMID: 4298514, PMID: 11478374,
	RE3241C			PMID: 4298514, PMID: 11478374,
	RE3241R			PMID: 4298514, PMID: 11478374,
	r0692			PMID: 4298514, PMID: 11478374,
	r0766			PMID: 4298514, PMID: 11478374,
	RE3103C			PMID: 4298514, PMID: 11478374,
	RE3103R			PMID: 4298514, PMID: 11478374,
	RE3170C			PMID: 4298514, PMID: 11478374,
	RE3170R			PMID: 4298514, PMID: 11478374,
	RE3120C			PMID: 4298514, PMID: 11478374,
	RE3120R			PMID: 4298514, PMID: 11478374,
	RE3151C			PMID: 4298514, PMID: 11478374,
	RE3151R			PMID: 4298514, PMID: 11478374,
	RE3165C			PMID: 4298514, PMID: 11478374,
	RE3165R			PMID: 4298514, PMID: 11478374,
	RE0569C			PMID: 4298514, PMID: 11478374,
	RE0569E			PMID: 4298514, PMID: 11478374,
	r0768			PMID: 4298514, PMID: 11478374,
	r0769			PMID: 4298514, PMID: 11478374,
	RE3161C			PMID: 4298514, PMID: 11478374,
	RE3161R			PMID: 4298514, PMID: 11478374,
	RE0565C			PMID: 4298514, PMID: 11478374,
	r0696			PMID: 4298514, PMID: 11478374,
	r0772			PMID: 4298514, PMID: 11478374,
	r0760			PMID: 4298514, PMID: 11478374,
	r0761			PMID: 4298514, PMID: 11478374,
	RE0580R			PMID: 4298514, PMID: 11478374,
	RE0580L			PMID: 4298514, PMID: 11478374,
	r0694			PMID: 4298514, PMID: 11478374,
	r0764			PMID: 4298514, PMID: 11478374,
	r1313			PMID: 4298514, PMID: 11478374,
	RE3174C			PMID: 4298514, PMID: 11478374,
	RE3174R			PMID: 4298514, PMID: 11478374,
	RE0573N			PMID: 4298514, PMID: 11478374,
	r0701			PMID: 4298514, PMID: 11478374,
	RE3106C			PMID: 4298514, PMID: 11478374,
	RE3106R			PMID: 4298514, PMID: 11478374,
	r0678			PMID: 4298514, PMID: 11478374,
	r0691			PMID: 4298514, PMID: 11478374,
	RE3147C			PMID: 4298514, PMID: 11478374,
	RE3147R			PMID: 4298514, PMID: 11478374,
	PTE5x			PMID: 4298514, PMID: 11478374,
	RE3169C			PMID: 4298514, PMID: 11478374,
	RE3169R			PMID: 4298514, PMID: 11478374,
	RE3173C			PMID: 4298514, PMID: 11478374,
	RE3173R			PMID: 4298514, PMID: 11478374,
	RE0577C			PMID: 4298514, PMID: 11478374,
	RE0577M			PMID: 4298514, PMID: 11478374,
	RE0577X			PMID: 4298514, PMID: 11478374,
	RE0568C			PMID: 4298514, PMID: 11478374,
	RE0578C			PMID: 4298514, PMID: 11478374,
	RE0578M			PMID: 4298514, PMID: 11478374,
	RE0578X			PMID: 4298514, PMID: 11478374,
	r0681			PMID: 4298514, PMID: 11478374,
	r0682			PMID: 4298514, PMID: 11478374,
	DESAT16_2			PMID: 4298514, PMID: 11478374,
	DESAT18_3			PMID: 4298514, PMID: 11478374,
	DESAT18_4			PMID: 4298514, PMID: 11478374,
	DESAT18_5			PMID: 4298514, PMID: 11478374,
	DESAT18_6			PMID: 4298514, PMID: 11478374,
	DESAT18_7			PMID: 4298514, PMID: 11478374,
	DESAT18_8			PMID: 4298514, PMID: 11478374,
	DESAT18_10			PMID: 4298514, PMID: 11478374,
	DESAT18_9			PMID: 4298514, PMID: 11478374,
	DESAT20_1			PMID: 4298514, PMID: 11478374,
	DESAT20_2			PMID: 4298514, PMID: 11478374,
	DESAT22_1p			PMID: 4298514, PMID: 11478374,
	DESAT22_2p			PMID: 4298514, PMID: 11478374,
	DESAT24_1			PMID: 4298514, PMID: 11478374,
	RE3168C			PMID: 4298514, PMID: 11478374,
	RE3168R			PMID: 4298514, PMID: 11478374,
	RE3164C			PMID: 4298514, PMID: 11478374,
	RE3164R			PMID: 4298514, PMID: 11478374,
	RE3232C			PMID: 4298514, PMID: 11478374,
	RE3232R			PMID: 4298514, PMID: 11478374,
	RE3236C			PMID: 4298514, PMID: 11478374,
	RE3236R			PMID: 4298514, PMID: 11478374,
	r0366			PMID: 4298514, PMID: 11478374,
	r0368			PMID: 4298514, PMID: 11478374,
	ACOATA			PMID: 4298514, PMID: 11478374,
	FAS100COA			PMID: 4298514, PMID: 11478374,
	r0693			PMID: 4298514, PMID: 11478374,
	r0767			PMID: 4298514, PMID: 11478374,
	RE3104C			PMID: 4298514, PMID: 11478374,
	r1466			PMID: 4298514, PMID: 11478374,
	RE3104R			PMID: 4298514, PMID: 11478374,
	RE3119C			PMID: 4298514, PMID: 11478374,
	RE3119R			PMID: 4298514, PMID: 11478374,
	RE0572N			PMID: 4298514, PMID: 11478374,
	FAS120COA			PMID: 4298514, PMID: 11478374,
	r0712			PMID: 4298514, PMID: 11478374,
	r0770			PMID: 4298514, PMID: 11478374,
	RE3113C			PMID: 4298514, PMID: 11478374,
	RE3113R			PMID: 4298514, PMID: 11478374,
	KAS8			PMID: 4298514, PMID: 11478374,
	PTE2x			PMID: 4298514, PMID: 11478374,
	r0697			PMID: 4298514, PMID: 11478374,
	r0773			PMID: 4298514, PMID: 11478374,
	r0791			PMID: 4298514, PMID: 11478374,
	r0762			PMID: 4298514, PMID: 11478374,
	r0763			PMID: 4298514, PMID: 11478374,
	RE0579M			PMID: 4298514, PMID: 11478374,
	RE0579C			PMID: 4298514, PMID: 11478374,
	RE0579X			PMID: 4298514, PMID: 11478374,
	MCOATA			PMID: 4298514, PMID: 11478374,
	MCOATAm			PMID: 4298514, PMID: 11478374,
	ACCOAC			PMID: 4298514, PMID: 11478374,
	RE0344C			PMID: 4298514, PMID: 11478374,
	RE0344M			PMID: 4298514, PMID: 11478374,
	RE0344X			PMID: 4298514, PMID: 11478374,
	RE3245C			PMID: 4298514, PMID: 11478374,
	r1315			PMID: 4298514, PMID: 11478374,
	RE3244C			PMID: 4298514, PMID: 11478374,
	RE3244R			PMID: 4298514, PMID: 11478374,
	FAS80COA_L			PMID: 4298514, PMID: 11478374,
	r0695			PMID: 4298514, PMID: 11478374,
	r0765			PMID: 4298514, PMID: 11478374,
	r0713			PMID: 4298514, PMID: 11478374,
	FAS160COA			PMID: 4298514, PMID: 11478374,
	PTE4x			PMID: 4298514, PMID: 11478374,
	PTE3x			PMID: 4298514, PMID: 11478374,
	r1317			PMID: 4298514, PMID: 11478374,
	r1316			PMID: 4298514, PMID: 11478374,
	FAS180COA			PMID: 4298514, PMID: 11478374,
	RE0583C			PMID: 4298514, PMID: 11478374,
	RE0583N			PMID: 4298514, PMID: 11478374,
	RE3123C			PMID: 4298514, PMID: 11478374,
	RE3123R			PMID: 4298514, PMID: 11478374,
	RE3150C			PMID: 4298514, PMID: 11478374,
	RE3150R			PMID: 4298514, PMID: 11478374,
	RE0576C			PMID: 4298514, PMID: 11478374,
	FAS140COA			PMID: 4298514, PMID: 11478374,
	r0702			PMID: 4298514, PMID: 11478374,
	r0771			PMID: 4298514, PMID: 11478374,
	RE3172C			PMID: 4298514, PMID: 11478374,
	RE3172R			PMID: 4298514, PMID: 11478374,
	RE3176C			PMID: 4298514, PMID: 11478374,
	RE3176R			PMID: 4298514, PMID: 11478374,
	RE3167C			PMID: 4298514, PMID: 11478374,
	RE3167R			PMID: 4298514, PMID: 11478374,
	RE3163C			PMID: 4298514, PMID: 11478374,
	RE3163R			PMID: 4298514, PMID: 11478374,
	RE3228C			PMID: 4298514, PMID: 11478374,
	RE3228R			PMID: 4298514, PMID: 11478374,
	RE3231C			PMID: 4298514, PMID: 11478374,
	RE3231R			PMID: 4298514, PMID: 11478374,
	RE3235C			PMID: 4298514, PMID: 11478374,
	RE3235R			PMID: 4298514, PMID: 11478374,
	RE3243C			PMID: 4298514, PMID: 11478374,
	RE3243R			PMID: 4298514, PMID: 11478374,
	r0735			PMID: 4298514, PMID: 11478374,
	RE0571C			PMID: 4298514, PMID: 11478374,
	RE0567C			PMID: 4298514, PMID: 11478374,
	RE0582N			PMID: 4298514, PMID: 11478374,
	RE0575C			PMID: 4298514, PMID: 11478374,
glycogen metabolism	PGMT			PMID: 4298514, PMID: 11478374,
	r1391			PMID: 4298514, PMID: 11478374,
	r1392			PMID: 4298514, PMID: 11478374,
	r1393			PMID: 4298514, PMID: 11478374,
	GLDBRAN			PMID: 4298514, PMID: 11478374,
	GLPASE1			PMID: 4298514, PMID: 11478374,
	GLPASE2			PMID: 4298514, PMID: 11478374,
	AMY2e			PMID: 4298514, PMID: 11478374,
	GAMYe			PMID: 4298514, PMID: 11478374,
	O16G1e			PMID: 4298514, PMID: 11478374,
	MLTG1			PMID: 4298514, PMID: 11478374,
	MLTG1e			PMID: 4298514, PMID: 11478374,
	MLTG1ly			PMID: 4298514, PMID: 11478374,
	GLBRAN			PMID: 4298514, PMID: 11478374,
	GLGNS1			PMID: 4298514, PMID: 11478374,
	GGNG			PMID: 4298514, PMID: 11478374,
pyruvate dehydrogenase	PDHm			PMID: 4298514, PMID: 11478374,
	r0383			PMID: 4298514, PMID: 11478374,
choline acetyltransferase	CHAT		The biosynthesis and storage of ACh can be divided into three processes that allow for recovery of hydrolyzed transmitter by choline transport back into the nerve ending, conversion by acetylation to active transmitter and then storage in a vesicle for subsequent release. Surprisingly, inhibitors of ChAT do not decrease ACh synthesis when used in vivo; this may reflect a failure to achieve a suff…	George J. Siegel, R. W. A., Scott T. Brady, Donald L. Price (2006) Basic neurochemistry: molecular, cellular and medical aspects. 7th edition.Elsevier publication.
phosphocreatine synthesis, mitochondria	CK			George J. Siegel, R. W. A., Scott T. Brady, Donald L. Price (2006) Basic neurochemistry: molecular, cellular and medical aspects. 7th edition.Elsevier publication.
malic enzyme, cytosol, astrocytes	ME2			George J. Siegel, R. W. A., Scott T. Brady, Donald L. Price (2006) Basic neurochemistry: molecular, cellular and medical aspects. 7th edition.Elsevier publication.
pyruvate carboxylase, mitochondria	PCm			George J. Siegel, R. W. A., Scott T. Brady, Donald L. Price (2006) Basic neurochemistry: molecular, cellular and medical aspects. 7th edition.Elsevier publication.
malate-aspartate shuttle	ASPTA			George J. Siegel, R. W. A., Scott T. Brady, Donald L. Price (2006) Basic neurochemistry: molecular, cellular and medical aspects. 7th edition.Elsevier publication.
	ASPTAm			George J. Siegel, R. W. A., Scott T. Brady, Donald L. Price (2006) Basic neurochemistry: molecular, cellular and medical aspects. 7th edition.Elsevier publication.
	MDH			George J. Siegel, R. W. A., Scott T. Brady, Donald L. Price (2006) Basic neurochemistry: molecular, cellular and medical aspects. 7th edition.Elsevier publication.
	MDHm			George J. Siegel, R. W. A., Scott T. Brady, Donald L. Price (2006) Basic neurochemistry: molecular, cellular and medical aspects. 7th edition.Elsevier publication.
	ASPGLUm			George J. Siegel, R. W. A., Scott T. Brady, Donald L. Price (2006) Basic neurochemistry: molecular, cellular and medical aspects. 7th edition.Elsevier publication.
	AKGMALtm			George J. Siegel, R. W. A., Scott T. Brady, Donald L. Price (2006) Basic neurochemistry: molecular, cellular and medical aspects. 7th edition.Elsevier publication.
GABA aminotransferase	ABTArm		Glucose is the principal precursor for GABA production in vivo, although pyruvate and other amino acids also can act as precursors. The first step in the GABA shunt is the transamination of α-ketoglutarate, formed from glucose metabolism in the Krebs cycle, by GABA: α-ketoglutarate transaminase (GABA-T, also known as. α-oxoglutarate-T) into l-glutamic acid [1, 2] (Fig. 16-1). Glutamic acid decarb…	George J. Siegel, R. W. A., Scott T. Brady, Donald L. Price (2006) Basic neurochemistry: molecular, cellular and medical aspects. 7th edition.Elsevier publication.
glutamate metabolism, mitochondria/ Succinic semialdehyde dehydrogenase	r0178			George J. Siegel, R. W. A., Scott T. Brady, Donald L. Price (2006) Basic neurochemistry: molecular, cellular and medical aspects. 7th edition.Elsevier publication.
	r0179			George J. Siegel, R. W. A., Scott T. Brady, Donald L. Price (2006) Basic neurochemistry: molecular, cellular and medical aspects. 7th edition.Elsevier publication.
purine salvage	HXPRT			George J. Siegel, R. W. A., Scott T. Brady, Donald L. Price (2006) Basic neurochemistry: molecular, cellular and medical aspects. 7th edition.Elsevier publication.
purine synthesis, cytosol	ADSS			George J. Siegel, R. W. A., Scott T. Brady, Donald L. Price (2006) Basic neurochemistry: molecular, cellular and medical aspects. 7th edition.Elsevier publication.
	ADSL1			George J. Siegel, R. W. A., Scott T. Brady, Donald L. Price (2006) Basic neurochemistry: molecular, cellular and medical aspects. 7th edition.Elsevier publication.
	ADK1			George J. Siegel, R. W. A., Scott T. Brady, Donald L. Price (2006) Basic neurochemistry: molecular, cellular and medical aspects. 7th edition.Elsevier publication.
	NDPK1			George J. Siegel, R. W. A., Scott T. Brady, Donald L. Price (2006) Basic neurochemistry: molecular, cellular and medical aspects. 7th edition.Elsevier publication.
methionine metabolism, cytosol	METAT			George J. Siegel, R. W. A., Scott T. Brady, Donald L. Price (2006) Basic neurochemistry: molecular, cellular and medical aspects. 7th edition.Elsevier publication.
creatine synthesis	GACMTRc		Creatine (Cr) is synthesized in the mammalian brain (Van Pilsum et al. 1972) as well as in primary brain cell cultures and nerve cell lines (Daly 1985; Dringen et al. 1998; Braissant et al. 2002). AGAT and GAMT are expressed in CNS, for which we provided the first detailed analysis demonstrating their expression in all the main structures of the adult rat brain, in every main cell types (neurons,…	PMID: 20796169.
	GLYAMDTRc			PMID: 20796169.
cysteine metabolism, cytosol/ SAH hydrolase	AHC			PMID: 20796169.
purine catabolism, cytosol/ adenosine deamianse	ADA			PMID: 20796169.
purine degradation, cytosol	NTD7			PMID: 20796169.
purine synthesis, cytosol	ADNK1			PMID: 20796169.
purine degradation, cytosol	PUNP5			PMID: 20796169.
	r0394			PMID: 20796169.
	r0395			PMID: 20796169.
	r0502			PMID: 20796169.
	r0504			PMID: 20796169.
arginine metabolism, cytosol	NOS2			PMID: 20796169.
	r0024			PMID: 20796169.
	r0145			PMID: 20796169.
	NOS1			PMID: 20796169.
phospholipid metabolism, extracellular space/ phospholipase A2	PLA2_2e		Ischemia or seizure triggers accumulation of free AA, DHA and other FFA in the brain( see also Chs 32, 37). This reflects PLA2 activation in excitable membranes [24]. Glutamate-induced AA release in mouse cortical neuronal cultures is mediated in part by a membrane-associated PLA2 activity, which is upregulated in alkaline pH and is therefore sensitive to the shifts in pH induced by excitatory ne…	George J. Siegel, R. W. A., Scott T. Brady, Donald L. Price (2006) Basic neurochemistry: molecular, cellular and medical aspects. 7th edition.Elsevier publication.
	PLA2_2			George J. Siegel, R. W. A., Scott T. Brady, Donald L. Price (2006) Basic neurochemistry: molecular, cellular and medical aspects. 7th edition.Elsevier publication.
prostaglandin synthesis, cytosol	PGS		However, brain, macula densa of kidney, testes and the female reproductive system also display constitutive levels of COX-2. In brain, the relatively high constitutive COX-2 expression appears to be almost exclusively neuronal. Dendrites and the perinuclear region are enriched in COX-2.	George J. Siegel, R. W. A., Scott T. Brady, Donald L. Price (2006) Basic neurochemistry: molecular, cellular and medical aspects. 7th edition.Elsevier publication.
	PGSr			George J. Siegel, R. W. A., Scott T. Brady, Donald L. Price (2006) Basic neurochemistry: molecular, cellular and medical aspects. 7th edition.Elsevier publication.
phospholipid metabolism, er/ inositol	H2ETer		Free arachidonic acid, along with diacylglycerols and free docosahexaenoic acid, is a product of membrane lipid breakdown at the onset of cerebral ischemia, seizures and other forms of brain trauma. Moreover, the initial release of FFA is, at least partially, derived from the activity of phospholipase C on inositol lipids (mainly phosphatidylinositol 4,5-bisphosphate), with FFAs being subsequentl…	George J. Siegel, R. W. A., Scott T. Brady, Donald L. Price (2006) Basic neurochemistry: molecular, cellular and medical aspects. 7th edition.Elsevier publication.
	H3ETer			George J. Siegel, R. W. A., Scott T. Brady, Donald L. Price (2006) Basic neurochemistry: molecular, cellular and medical aspects. 7th edition.Elsevier publication.
	H4ET3er			George J. Siegel, R. W. A., Scott T. Brady, Donald L. Price (2006) Basic neurochemistry: molecular, cellular and medical aspects. 7th edition.Elsevier publication.
	H4ETer			George J. Siegel, R. W. A., Scott T. Brady, Donald L. Price (2006) Basic neurochemistry: molecular, cellular and medical aspects. 7th edition.Elsevier publication.
	H6_ET2er			George J. Siegel, R. W. A., Scott T. Brady, Donald L. Price (2006) Basic neurochemistry: molecular, cellular and medical aspects. 7th edition.Elsevier publication.
	H6ET3er			George J. Siegel, R. W. A., Scott T. Brady, Donald L. Price (2006) Basic neurochemistry: molecular, cellular and medical aspects. 7th edition.Elsevier publication.
	H6_ETer			George J. Siegel, R. W. A., Scott T. Brady, Donald L. Price (2006) Basic neurochemistry: molecular, cellular and medical aspects. 7th edition.Elsevier publication.
	H7ET2er			George J. Siegel, R. W. A., Scott T. Brady, Donald L. Price (2006) Basic neurochemistry: molecular, cellular and medical aspects. 7th edition.Elsevier publication.
	H7_ETer			George J. Siegel, R. W. A., Scott T. Brady, Donald L. Price (2006) Basic neurochemistry: molecular, cellular and medical aspects. 7th edition.Elsevier publication.
	H7_TAer			George J. Siegel, R. W. A., Scott T. Brady, Donald L. Price (2006) Basic neurochemistry: molecular, cellular and medical aspects. 7th edition.Elsevier publication.
	H8TAer			George J. Siegel, R. W. A., Scott T. Brady, Donald L. Price (2006) Basic neurochemistry: molecular, cellular and medical aspects. 7th edition.Elsevier publication.
	M4ATAer			George J. Siegel, R. W. A., Scott T. Brady, Donald L. Price (2006) Basic neurochemistry: molecular, cellular and medical aspects. 7th edition.Elsevier publication.
	M4BET2er			George J. Siegel, R. W. A., Scott T. Brady, Donald L. Price (2006) Basic neurochemistry: molecular, cellular and medical aspects. 7th edition.Elsevier publication.
	M4BTAer			George J. Siegel, R. W. A., Scott T. Brady, Donald L. Price (2006) Basic neurochemistry: molecular, cellular and medical aspects. 7th edition.Elsevier publication.
	M4CET3er			George J. Siegel, R. W. A., Scott T. Brady, Donald L. Price (2006) Basic neurochemistry: molecular, cellular and medical aspects. 7th edition.Elsevier publication.
prostaglandin synthesis, cytosol	RE2799C		Cyclooxygenase and lipoxygenase products accumulate during reperfusion following cerebral ischemia. The levels of lipoxygenase products (Fig. 33-3) increase more slowly than COX products but remain raised for longer periods of time. The cellular sites of synthesis of ischemia–reperfusion-induced eicosanoids within the brain have not yet been fully assessed. Glia and microglia comprise major infla…	George J. Siegel, R. W. A., Scott T. Brady, Donald L. Price (2006) Basic neurochemistry: molecular, cellular and medical aspects. 7th edition.Elsevier publication.
	PGDI			George J. Siegel, R. W. A., Scott T. Brady, Donald L. Price (2006) Basic neurochemistry: molecular, cellular and medical aspects. 7th edition.Elsevier publication.
	PGS			George J. Siegel, R. W. A., Scott T. Brady, Donald L. Price (2006) Basic neurochemistry: molecular, cellular and medical aspects. 7th edition.Elsevier publication.
	RE1077C			George J. Siegel, R. W. A., Scott T. Brady, Donald L. Price (2006) Basic neurochemistry: molecular, cellular and medical aspects. 7th edition.Elsevier publication.
	PGSr			George J. Siegel, R. W. A., Scott T. Brady, Donald L. Price (2006) Basic neurochemistry: molecular, cellular and medical aspects. 7th edition.Elsevier publication.
	PGDIr			George J. Siegel, R. W. A., Scott T. Brady, Donald L. Price (2006) Basic neurochemistry: molecular, cellular and medical aspects. 7th edition.Elsevier publication.
	PGESr			George J. Siegel, R. W. A., Scott T. Brady, Donald L. Price (2006) Basic neurochemistry: molecular, cellular and medical aspects. 7th edition.Elsevier publication.
	PGISr			George J. Siegel, R. W. A., Scott T. Brady, Donald L. Price (2006) Basic neurochemistry: molecular, cellular and medical aspects. 7th edition.Elsevier publication.
	CBR2			George J. Siegel, R. W. A., Scott T. Brady, Donald L. Price (2006) Basic neurochemistry: molecular, cellular and medical aspects. 7th edition.Elsevier publication.
thromboxane synthesis, er	TXASr			George J. Siegel, R. W. A., Scott T. Brady, Donald L. Price (2006) Basic neurochemistry: molecular, cellular and medical aspects. 7th edition.Elsevier publication.
leukotriene synthesis	ALOX12			George J. Siegel, R. W. A., Scott T. Brady, Donald L. Price (2006) Basic neurochemistry: molecular, cellular and medical aspects. 7th edition.Elsevier publication.
	ALOX15			George J. Siegel, R. W. A., Scott T. Brady, Donald L. Price (2006) Basic neurochemistry: molecular, cellular and medical aspects. 7th edition.Elsevier publication.
	ALOX5			George J. Siegel, R. W. A., Scott T. Brady, Donald L. Price (2006) Basic neurochemistry: molecular, cellular and medical aspects. 7th edition.Elsevier publication.
	ALOX52			George J. Siegel, R. W. A., Scott T. Brady, Donald L. Price (2006) Basic neurochemistry: molecular, cellular and medical aspects. 7th edition.Elsevier publication.
	LTA4H			George J. Siegel, R. W. A., Scott T. Brady, Donald L. Price (2006) Basic neurochemistry: molecular, cellular and medical aspects. 7th edition.Elsevier publication.
	r0641			George J. Siegel, R. W. A., Scott T. Brady, Donald L. Price (2006) Basic neurochemistry: molecular, cellular and medical aspects. 7th edition.Elsevier publication.
	LTC4Sr			George J. Siegel, R. W. A., Scott T. Brady, Donald L. Price (2006) Basic neurochemistry: molecular, cellular and medical aspects. 7th edition.Elsevier publication.
	LTD4DP			George J. Siegel, R. W. A., Scott T. Brady, Donald L. Price (2006) Basic neurochemistry: molecular, cellular and medical aspects. 7th edition.Elsevier publication.
	GGT5r			George J. Siegel, R. W. A., Scott T. Brady, Donald L. Price (2006) Basic neurochemistry: molecular, cellular and medical aspects. 7th edition.Elsevier publication.
	GGT6			George J. Siegel, R. W. A., Scott T. Brady, Donald L. Price (2006) Basic neurochemistry: molecular, cellular and medical aspects. 7th edition.Elsevier publication.
lipoxin synthesis	RE3040C			George J. Siegel, R. W. A., Scott T. Brady, Donald L. Price (2006) Basic neurochemistry: molecular, cellular and medical aspects. 7th edition.Elsevier publication.
	RE3040R			George J. Siegel, R. W. A., Scott T. Brady, Donald L. Price (2006) Basic neurochemistry: molecular, cellular and medical aspects. 7th edition.Elsevier publication.
	RE3040X			George J. Siegel, R. W. A., Scott T. Brady, Donald L. Price (2006) Basic neurochemistry: molecular, cellular and medical aspects. 7th edition.Elsevier publication.
	RE3038C			George J. Siegel, R. W. A., Scott T. Brady, Donald L. Price (2006) Basic neurochemistry: molecular, cellular and medical aspects. 7th edition.Elsevier publication.
	RE3044C			George J. Siegel, R. W. A., Scott T. Brady, Donald L. Price (2006) Basic neurochemistry: molecular, cellular and medical aspects. 7th edition.Elsevier publication.
	RE3038R			George J. Siegel, R. W. A., Scott T. Brady, Donald L. Price (2006) Basic neurochemistry: molecular, cellular and medical aspects. 7th edition.Elsevier publication.
	RE3038N			George J. Siegel, R. W. A., Scott T. Brady, Donald L. Price (2006) Basic neurochemistry: molecular, cellular and medical aspects. 7th edition.Elsevier publication.
	RE3044N			George J. Siegel, R. W. A., Scott T. Brady, Donald L. Price (2006) Basic neurochemistry: molecular, cellular and medical aspects. 7th edition.Elsevier publication.
	RE3038X			George J. Siegel, R. W. A., Scott T. Brady, Donald L. Price (2006) Basic neurochemistry: molecular, cellular and medical aspects. 7th edition.Elsevier publication.
demand rxn	sink_crvnc(c)		Brain and retina are the tissues containing the highest contents of docosahexaenoic acid. DHA is used continuously for the biogenesis and maintenance of neuronal and photoreceptor membranes (see also Ch. 49).	George J. Siegel, R. W. A., Scott T. Brady, Donald L. Price (2006) Basic neurochemistry: molecular, cellular and medical aspects. 7th edition.Elsevier publication.
tyrosine metabolism, cytosol/ DOPA decarboxylase	3HLYTCL		DOPA decarboxylase (DDC) is widely distributed throughout the body, where it is found both in catecholamine- and serotonin-containing neurons and in non-neuronal tissues, such as kidney and blood vessels. In dopamine-containing neurons, this enzyme is the final step in the pathway and this is exploited clinically in the treatment of Parkinson’s disease by giving patients excess l-DOPA to boost th…	George J. Siegel, R. W. A., Scott T. Brady, Donald L. Price (2006) Basic neurochemistry: molecular, cellular and medical aspects. 7th edition.Elsevier publication.
tyrosine metabolism, cytosol/ tyrosine hydroxylase	TYRDOPO		The locus coeruleus contains only tyrosine hydroxylase-immunoreactive cells and appears to be the source of a discrete dorsal catecholaminergic bundle which runs through the central tegmental field just ventrolateral to the periaqueductal gray of the rostral pons and mesencephalon and which does not contain adrenergic axon.	PMID: 2899306
	TYR3MO2		For neurons that synthesize epinephrine or norepinephrine, dopamine β-hydroxylase is the next step in the biosynthetic pathway. Like tyrosine hydroxylase (TH), dopamine β-hydroxylase (DBH) is a mixed-function oxidase that uses molecular oxygen to form the hydroxyl group added to the carbon on the side chain of dopamine [3].The enzyme is concentrated within the vesicles that store catecholamines; …	George J. Siegel, R. W. A., Scott T. Brady, Donald L. Price (2006) Basic neurochemistry: molecular, cellular and medical aspects. 7th edition.Elsevier publication.
	TYRDOPO3			George J. Siegel, R. W. A., Scott T. Brady, Donald L. Price (2006) Basic neurochemistry: molecular, cellular and medical aspects. 7th edition.Elsevier publication.
tyrosine metabolism, cytosol/ dopamine β-hydroxylase	DOPABMO			George J. Siegel, R. W. A., Scott T. Brady, Donald L. Price (2006) Basic neurochemistry: molecular, cellular and medical aspects. 7th edition.Elsevier publication.
tyrosine metabolism, cytosol/ Phenylethanolamine N-methyltransferase	NORANMT		In cells that synthesize epinephrine, the final step in the pathway is catalyzed by the enzyme phenylethanolamine N-methyltransferase. This enzyme is found in a small group of neurons in the brainstem that use epinephrine as their neurotransmitter and in the adrenal medullary cells, for which epinephrine is the primary hormone secreted. Phenylethanolamine N-methyltransferase (PNMT) transfers a me…	George J. Siegel, R. W. A., Scott T. Brady, Donald L. Price (2006) Basic neurochemistry: molecular, cellular and medical aspects. 7th edition.Elsevier publication.
tyrosine metabolism, cytosol/ degradation of catechoamines	41R1H2MAE12BOOX		Monoamine oxidase and catechol-O-methyltransferase are primarily responsible for the inactivation of catecholamines. MAO and catechol-O-methyltransferase (COMT) are widely distributed throughout the body (Fig. 12-3). MAO is a flavin-containing enzyme located on the outer membrane of the mitochondria [14]. This enzyme oxidatively deaminates catecholamines to their corresponding aldehydes; these ca…	George J. Siegel, R. W. A., Scott T. Brady, Donald L. Price (2006) Basic neurochemistry: molecular, cellular and medical aspects. 7th edition.Elsevier publication.
	41R2A1H12BOOX			George J. Siegel, R. W. A., Scott T. Brady, Donald L. Price (2006) Basic neurochemistry: molecular, cellular and medical aspects. 7th edition.Elsevier publication.
	34DHOXPEGOX			George J. Siegel, R. W. A., Scott T. Brady, Donald L. Price (2006) Basic neurochemistry: molecular, cellular and medical aspects. 7th edition.Elsevier publication.
	34DHXMANDACOX			George J. Siegel, R. W. A., Scott T. Brady, Donald L. Price (2006) Basic neurochemistry: molecular, cellular and medical aspects. 7th edition.Elsevier publication.
	34DHXMANDACOX_NADP_			George J. Siegel, R. W. A., Scott T. Brady, Donald L. Price (2006) Basic neurochemistry: molecular, cellular and medical aspects. 7th edition.Elsevier publication.
	34DHOXPEGt			George J. Siegel, R. W. A., Scott T. Brady, Donald L. Price (2006) Basic neurochemistry: molecular, cellular and medical aspects. 7th edition.Elsevier publication.
	SALMCOM			George J. Siegel, R. W. A., Scott T. Brady, Donald L. Price (2006) Basic neurochemistry: molecular, cellular and medical aspects. 7th edition.Elsevier publication.
	MAOLNOR			George J. Siegel, R. W. A., Scott T. Brady, Donald L. Price (2006) Basic neurochemistry: molecular, cellular and medical aspects. 7th edition.Elsevier publication.
	3MOX4HOXPGALDOX			George J. Siegel, R. W. A., Scott T. Brady, Donald L. Price (2006) Basic neurochemistry: molecular, cellular and medical aspects. 7th edition.Elsevier publication.
	3MOX4HOXPGALDOX_NADP_			George J. Siegel, R. W. A., Scott T. Brady, Donald L. Price (2006) Basic neurochemistry: molecular, cellular and medical aspects. 7th edition.Elsevier publication.
	r0754		4-hydroxy-3-methoxy-phenylacetic acid, more commonly known as homovanillic acid (HVA), is a major metabolite of dopamine. Spinal fluid concentrations of HVA provide insight into the turnover of dopamine in the striatum. Concentrations of HVA are decreased, for example, in the CSF of patients with Parkinson’s disease (see Ch. 46). A metabolite of norepinephrine formed relatively selectively in the…	George J. Siegel, R. W. A., Scott T. Brady, Donald L. Price (2006) Basic neurochemistry: molecular, cellular and medical aspects. 7th edition.Elsevier publication.
	r0755			George J. Siegel, R. W. A., Scott T. Brady, Donald L. Price (2006) Basic neurochemistry: molecular, cellular and medical aspects. 7th edition.Elsevier publication.
	r0756		Monoamine oxidase and catechol-O-methyltransferase are primarily responsible for the inactivation of catecholamines. MAO and catechol-O-methyltransferase (COMT) are widely distributed throughout the body (Fig. 12-3). MAO is a flavin-containing enzyme located on the outer membrane of the mitochondria [14]. This enzyme oxidatively deaminates catecholamines to their corresponding aldehydes; these ca…	George J. Siegel, R. W. A., Scott T. Brady, Donald L. Price (2006) Basic neurochemistry: molecular, cellular and medical aspects. 7th edition.Elsevier publication.
	r0757			George J. Siegel, R. W. A., Scott T. Brady, Donald L. Price (2006) Basic neurochemistry: molecular, cellular and medical aspects. 7th edition.Elsevier publication.
tryptophan degradation, cytosol/ tryptophan hydroxylase	TRPHYDRO2		The amino acid L-tryptophan is the precursor for the synthesis of 5-hydroxytryptamine (5-HT). The initial step in the synthesis of serotonin is the facilitated transport of the amino acid l-tryptophan from blood into brain. The primary source of tryptophan is dietary protein. Other neutral amino acids, such as phenylalanine, leucine and methionine, are transported by the same carrier into the bra…	George J. Siegel, R. W. A., Scott T. Brady, Donald L. Price (2006) Basic neurochemistry: molecular, cellular and medical aspects. 7th edition.Elsevier publication.
tryptophan degradation, cytosol/ tryptophan decarboxylase	5HLTDL		The other enzyme involved in the synthesis of 5-HT, aromatic l-amino acid decarboxylase (AADC) (EC 4.1.1.28), is a soluble pyridoxal-5′-phosphate-dependent enzyme, which converts 5-HTP to 5-HT (Fig. 13-5). It has been demonstrated that administration of pyridoxine increases the rate of synthesis of 5-HT in monkey brain, as revealed using position emission tomography (this technique is discussed i…	George J. Siegel, R. W. A., Scott T. Brady, Donald L. Price (2006) Basic neurochemistry: molecular, cellular and medical aspects. 7th edition.Elsevier publication.
	SRTNACT		Not only does 5-HT have important physiological effects of its own but it is also the precursor of the hormone melatonin. Melatonin is synthesized from serotonin, and the pineal gland contains all the enzymes necessary to synthesize serotonin from tryptophan as well as two additional enzymes required to convert serotonin to melatonin (Fig. 13-5). The rate-limiting enzyme serotonin N-acetyl transf…	George J. Siegel, R. W. A., Scott T. Brady, Donald L. Price (2006) Basic neurochemistry: molecular, cellular and medical aspects. 7th edition.Elsevier publication.
	ACSRTNMT			George J. Siegel, R. W. A., Scott T. Brady, Donald L. Price (2006) Basic neurochemistry: molecular, cellular and medical aspects. 7th edition.Elsevier publication.
	5HOXINOXDA		The primary catabolic pathway for 5-HT is oxidative deamination by the enzyme monoamine oxidase. Monoamine oxidase (MAO) (E.C.1.4.3.4.) converts serotonin to 5-hydroxy-indoleacetaldehyde, and this product is oxidized by an NAD+-dependent aldehyde dehydrogenase to form 5-hydroxyindoleacetic acid (5-HIAA)	George J. Siegel, R. W. A., Scott T. Brady, Donald L. Price (2006) Basic neurochemistry: molecular, cellular and medical aspects. 7th edition.Elsevier publication.
histidine metabolism, histamine synthesis, cytosol	HISDC		It is now clear that histamine is formed within and released from central nervous system neurons and is an important regulator of several brain functions. A number of substances are colocalized with histamine and its biosynthetic enzyme in hypothalamic tuberomammillary neurons [15]. These include glutamate decarboxylase, GABA, GABA-transaminase, adenosine deaminase, monoamine oxidase-B and the ne…	George J. Siegel, R. W. A., Scott T. Brady, Donald L. Price (2006) Basic neurochemistry: molecular, cellular and medical aspects. 7th edition.Elsevier publication.
histidine metabolism, cytosol	SAMHISTA		In the vertebrate brain, histamine metabolism occurs predominantly by methylation. HMT, the histaminemethylating enzyme, uses the methyl donor S-adenosyl-lmethionine.	George J. Siegel, R. W. A., Scott T. Brady, Donald L. Price (2006) Basic neurochemistry: molecular, cellular and medical aspects. 7th edition.Elsevier publication.
	MHISOR		It is now clear that histamine is formed within and released from central nervous system neurons and is an important regulator of several brain functions. A number of substances are colocalized with histamine and its biosynthetic enzyme in hypothalamic tuberomammillary neurons [15]. These include glutamate decarboxylase, GABA, GABA-transaminase, adenosine deaminase, monoamine oxidase-B and the ne…	George J. Siegel, R. W. A., Scott T. Brady, Donald L. Price (2006) Basic neurochemistry: molecular, cellular and medical aspects. 7th edition.Elsevier publication.
	MACOXO			George J. Siegel, R. W. A., Scott T. Brady, Donald L. Price (2006) Basic neurochemistry: molecular, cellular and medical aspects. 7th edition.Elsevier publication.
	3MLDAt			George J. Siegel, R. W. A., Scott T. Brady, Donald L. Price (2006) Basic neurochemistry: molecular, cellular and medical aspects. 7th edition.Elsevier publication.
	HISTASE			George J. Siegel, R. W. A., Scott T. Brady, Donald L. Price (2006) Basic neurochemistry: molecular, cellular and medical aspects. 7th edition.Elsevier publication.
	IMACTD			George J. Siegel, R. W. A., Scott T. Brady, Donald L. Price (2006) Basic neurochemistry: molecular, cellular and medical aspects. 7th edition.Elsevier publication.
one carbon metabolism/ glycine synthesis	GHMT2rm		Glycine is widely recognized as a major inhibitory neurotransmitter in the vertebrate CNS, especially the spinal cord and brainstem, where it is crucial for the regulation of motoneuron activity. The immediate precursor of glycine is serine, which is converted to glycine by the activity of the enzyme serine hydroxymethyltransferase (SHMT) (see Fig. 40-3). Glycine is packaged into synaptic vesicle…	George J. Siegel, R. W. A., Scott T. Brady, Donald L. Price (2006) Basic neurochemistry: molecular, cellular and medical aspects. 7th edition.Elsevier publication.
	GHMT2r			George J. Siegel, R. W. A., Scott T. Brady, Donald L. Price (2006) Basic neurochemistry: molecular, cellular and medical aspects. 7th edition.Elsevier publication.
glycine cleavage, mitochondria	GCC2am		Glycine is degraded intracellularly by the glycine cleavage system (see Fig. 40-3), a multienzyme complex composed of four different proteins, which, in the CNS, appears to be primarily localized in astrocytes [25]. Mutations in the glycine cleavage system cause nonketotic hyperglycinemia, a disease characterized by severe mental retardation (‘glycine encephalopathy’).	George J. Siegel, R. W. A., Scott T. Brady, Donald L. Price (2006) Basic neurochemistry: molecular, cellular and medical aspects. 7th edition.Elsevier publication.
	GCC2bim			George J. Siegel, R. W. A., Scott T. Brady, Donald L. Price (2006) Basic neurochemistry: molecular, cellular and medical aspects. 7th edition.Elsevier publication.
	GCC2cm			George J. Siegel, R. W. A., Scott T. Brady, Donald L. Price (2006) Basic neurochemistry: molecular, cellular and medical aspects. 7th edition.Elsevier publication.
	GCCam			George J. Siegel, R. W. A., Scott T. Brady, Donald L. Price (2006) Basic neurochemistry: molecular, cellular and medical aspects. 7th edition.Elsevier publication.
	GCCbim			George J. Siegel, R. W. A., Scott T. Brady, Donald L. Price (2006) Basic neurochemistry: molecular, cellular and medical aspects. 7th edition.Elsevier publication.
	GCCcm			George J. Siegel, R. W. A., Scott T. Brady, Donald L. Price (2006) Basic neurochemistry: molecular, cellular and medical aspects. 7th edition.Elsevier publication.
biomass_maintenance	biomass_maintenance		taken fron recon2, removed 0.009898 dgtp[n] + 0.009442 dctp[n] + 0.013183 datp[n] + 0.013091 dttp[n], as brain cells do not replicate
tyrosine metabolism	SALMCOM		added as per human proteome data by Kim et al	PMID: 24870542.
	SALMCOM2			PMID: 24870542.
transport extracellular	CYSTGLUex		added as per human proteome data by Kim et al	PMID: 24870542
fatty acid synthesis, 3-oxodocosanoyl-CoA, extracellular space	RE0569E		added as per human proteome data by Kim et al	PMID: 24870542
chondroitin sulphate degradation, lysosome	S4TASE1ly		added as per human proteome data by Kim et al	PMID: 24870542.
	S4TASE2ly			PMID: 24870542.
	S4TASE3ly			PMID: 24870542.
	S4TASE4ly			PMID: 24870542.
	S4TASE5ly			PMID: 24870542.
vitamin a metabolism, retinal synthesis, cytosol	BCDO		added as per human proteome data by Kim et al	PMID: 24870542
transport extracellular, ADPribose	ADPRIBt		added as per human proteome data by Kim et al	PMID: 24870542.
	NADNe			PMID: 24870542.
	NADPNe			PMID: 24870542.
demand rxn	DM_dctp_m_			required for replication of mitochondrial genome
	DM_dgtp_m_			required for replication of mitochondrial genome
	DM_dttp_m_			required for replication of mitochondrial genome
	DM_datp_m_			required for replication of mitochondrial genome
	DM_itp(n)			required for replication of mitochondrial genome
estradiol synthesis, er	P45019A2r		Novel exon 1 of the aromatase gene specific for aromatase transcripts in human brain.	PMID: 8117272
phospholipid metabolism, cytosol	PCHOLPg_hs		We investigated phospholipase D (PLD)-binding proteins obtained from rat brain extract, and identified a 67-kDa protein as Munc-18-1 by peptide-mass finger-printing.	PMID: 14744865
choline acetyltransferase, nucleus	CHATn		choline acetyl transferase, (EC 2.3.1.6) catalyzes the reversible synthesis of acetylcholine from acetyl-coenzyme A and choline. This enzyme has been purified to varying degrees of homogeneity from a variety of sources, including rat brain (l-5), bovine brain (6, 7), squid head ganglia @-lo), human placenta (11, 121, and human brain (13).	PMID: 873917
sink	sink_Tyr_ggn(c)		Glycogen synthesis in astrocytes is initated when they are refed with glucose (28). This is confirmed (Fig. Ia), as wel as the marked limitation of glycogen formation that ocurs when ammonium ions are present (20). The initation of glycogen synthesis is not related to changes in MGS activity (Fig. ic). MGS, measured with glycogen as primer, is already active before the cels receive glucose and ch…	PMID: 8224611, PMID: 10644553, PMID: 15238248, PMID: 2973423
cholesterol synthesis, cytosol	FRTT		added as per human proteome data by Kim et al	PMID: 24870542
	PMEVKc		added as per human proteome data by Kim et al	PMID: 24870542
prostaglandin synthesis, er	PGDIr		added as per human proteome data by Kim et al	PMID: 24870542
3-aminoisobutyrate transaminase, mitochondria	3AIBTm		added as per human proteome data by Kim et al	PMID: 24870542
tryptophan degradation, cytosol	SRTNACT		added as per human proteome data by Kim et al	PMID: 24870542
	ACSOMT		added as per human proteome data by Kim et al	PMID: 24870542
bile acid transporters	CHOLATEt2		It is noteworthy that, in the brain, only unconjugated bile acids are observed, whereas bile acids exist in serum in both unconjugated and taurine-conjugated forms (28). Several bile acids, such as 6-hydroxylated -muricholic, -muricholic, and hyodeoxycholic acids, which are abundant in rat serum (28), are not found in the brain. These observations, taken together, suggest that bile acids are tran…	PMID: 14617741, PMID: 11316487.
	ESTRONESt2			PMID: 14617741, PMID: 11316487.
	GCHOLAt2			PMID: 14617741, PMID: 11316487.
	TCHOLAt2			PMID: 14617741, PMID: 11316487.
	r0992			PMID: 14617741, PMID: 11316487.
	r1015			PMID: 14617741, PMID: 11316487.
	r1163			PMID: 14617741, PMID: 11316487.
	r1495			PMID: 14617741, PMID: 11316487.
	r1497			PMID: 14617741, PMID: 11316487.
	r1498			PMID: 14617741, PMID: 11316487.
	r1499			PMID: 14617741, PMID: 11316487.
	r1500			PMID: 14617741, PMID: 11316487.
	r1501			PMID: 14617741, PMID: 11316487.
	r1502			PMID: 14617741, PMID: 11316487.
	r1503			PMID: 14617741, PMID: 11316487.
	C03990t			PMID: 14617741, PMID: 11316487.
heme synthesis	CPPPGO		all heme synthesis and degradation enzymes are active in brain. There are great differences in rates of heme synthesis between different organs, with erythroid cells having the highest rates, with the liver being second. There are two genes for 5-aminolevulinic acid synthase, the first enzyme in heme synthesis (Ponka, 1999). The S1 gene is ubiquitous and in the brain, whereas the S2 gene is found…	PMID: 12796711.
	HMBS		all heme synthesis and degradation enzymes are active in brain. There are great differences in rates of heme synthesis between different organs, with erythroid cells having the highest rates, with the liver being second. There are two genes for 5-aminolevulinic acid synthase, the first enzyme in heme synthesis (Ponka, 1999). The S1 gene is ubiquitous and in the brain, whereas the S2 gene is found…	PMID: 12796711.
	PPBNGS		all heme synthesis and degradation enzymes are active in brain. There are great differences in rates of heme synthesis between different organs, with erythroid cells having the highest rates, with the liver being second. There are two genes for 5-aminolevulinic acid synthase, the first enzyme in heme synthesis (Ponka, 1999). The S1 gene is ubiquitous and in the brain, whereas the S2 gene is found…	PMID: 12796711.
	UPP3S		all heme synthesis and degradation enzymes are active in brain. There are great differences in rates of heme synthesis between different organs, with erythroid cells having the highest rates, with the liver being second. There are two genes for 5-aminolevulinic acid synthase, the first enzyme in heme synthesis (Ponka, 1999). The S1 gene is ubiquitous and in the brain, whereas the S2 gene is found…	PMID: 12796711.
	UPPDC1		all heme synthesis and degradation enzymes are active in brain. There are great differences in rates of heme synthesis between different organs, with erythroid cells having the highest rates, with the liver being second. There are two genes for 5-aminolevulinic acid synthase, the first enzyme in heme synthesis (Ponka, 1999). The S1 gene is ubiquitous and in the brain, whereas the S2 gene is found…	PMID: 12796711.
	RE3051C		all heme synthesis and degradation enzymes are active in brain. There are great differences in rates of heme synthesis between different organs, with erythroid cells having the highest rates, with the liver being second. There are two genes for 5-aminolevulinic acid synthase, the first enzyme in heme synthesis (Ponka, 1999). The S1 gene is ubiquitous and in the brain, whereas the S2 gene is found…	PMID: 12796711.
	RE3052C		all heme synthesis and degradation enzymes are active in brain. There are great differences in rates of heme synthesis between different organs, with erythroid cells having the highest rates, with the liver being second. There are two genes for 5-aminolevulinic acid synthase, the first enzyme in heme synthesis (Ponka, 1999). The S1 gene is ubiquitous and in the brain, whereas the S2 gene is found…	PMID: 12796711.
	RE3053C		all heme synthesis and degradation enzymes are active in brain. There are great differences in rates of heme synthesis between different organs, with erythroid cells having the highest rates, with the liver being second. There are two genes for 5-aminolevulinic acid synthase, the first enzyme in heme synthesis (Ponka, 1999). The S1 gene is ubiquitous and in the brain, whereas the S2 gene is found…	PMID: 12796711.
	RE3637C		all heme synthesis and degradation enzymes are active in brain. There are great differences in rates of heme synthesis between different organs, with erythroid cells having the highest rates, with the liver being second. There are two genes for 5-aminolevulinic acid synthase, the first enzyme in heme synthesis (Ponka, 1999). The S1 gene is ubiquitous and in the brain, whereas the S2 gene is found…	PMID: 12796711.
	FCLTc		all heme synthesis and degradation enzymes are active in brain. There are great differences in rates of heme synthesis between different organs, with erythroid cells having the highest rates, with the liver being second. There are two genes for 5-aminolevulinic acid synthase, the first enzyme in heme synthesis (Ponka, 1999). The S1 gene is ubiquitous and in the brain, whereas the S2 gene is found…	PMID: 12796711.
	PPPGOc		all heme synthesis and degradation enzymes are active in brain. There are great differences in rates of heme synthesis between different organs, with erythroid cells having the highest rates, with the liver being second. There are two genes for 5-aminolevulinic acid synthase, the first enzyme in heme synthesis (Ponka, 1999). The S1 gene is ubiquitous and in the brain, whereas the S2 gene is found…	PMID: 12796711.
	r0774		all heme synthesis and degradation enzymes are active in brain. There are great differences in rates of heme synthesis between different organs, with erythroid cells having the highest rates, with the liver being second. There are two genes for 5-aminolevulinic acid synthase, the first enzyme in heme synthesis (Ponka, 1999). The S1 gene is ubiquitous and in the brain, whereas the S2 gene is found…	PMID: 12796711.
	ALASm		all heme synthesis and degradation enzymes are active in brain. There are great differences in rates of heme synthesis between different organs, with erythroid cells having the highest rates, with the liver being second. There are two genes for 5-aminolevulinic acid synthase, the first enzyme in heme synthesis (Ponka, 1999). The S1 gene is ubiquitous and in the brain, whereas the S2 gene is found…	PMID: 12796711.
	FCLTm		all heme synthesis and degradation enzymes are active in brain. There are great differences in rates of heme synthesis between different organs, with erythroid cells having the highest rates, with the liver being second. There are two genes for 5-aminolevulinic acid synthase, the first enzyme in heme synthesis (Ponka, 1999). The S1 gene is ubiquitous and in the brain, whereas the S2 gene is found…	PMID: 12796711.
	PPPG9tm		all heme synthesis and degradation enzymes are active in brain. There are great differences in rates of heme synthesis between different organs, with erythroid cells having the highest rates, with the liver being second. There are two genes for 5-aminolevulinic acid synthase, the first enzyme in heme synthesis (Ponka, 1999). The S1 gene is ubiquitous and in the brain, whereas the S2 gene is found…	PMID: 12796711.
	PPPGOm		all heme synthesis and degradation enzymes are active in brain. There are great differences in rates of heme synthesis between different organs, with erythroid cells having the highest rates, with the liver being second. There are two genes for 5-aminolevulinic acid synthase, the first enzyme in heme synthesis (Ponka, 1999). The S1 gene is ubiquitous and in the brain, whereas the S2 gene is found…	PMID: 12796711.
	r0196		all heme synthesis and degradation enzymes are active in brain. There are great differences in rates of heme synthesis between different organs, with erythroid cells having the highest rates, with the liver being second. There are two genes for 5-aminolevulinic acid synthase, the first enzyme in heme synthesis (Ponka, 1999). The S1 gene is ubiquitous and in the brain, whereas the S2 gene is found…	PMID: 12796711.
	r0517		all heme synthesis and degradation enzymes are active in brain. There are great differences in rates of heme synthesis between different organs, with erythroid cells having the highest rates, with the liver being second. There are two genes for 5-aminolevulinic acid synthase, the first enzyme in heme synthesis (Ponka, 1999). The S1 gene is ubiquitous and in the brain, whereas the S2 gene is found…	PMID: 12796711.
heme degradation	BILIRED		Endogenous sources of heme in neurons and glia would be derived mainly from cytoplasmic heme proteins and mitochondrial cytochromes and would be involved in the normal turnover of the heme-containing proteins. Exogenous sources of heme could be derived from the death of neighboring cells that would release their heme proteins or from heme derived from hemoglobin that occurs following ICH or SAH i…	PMID: 12796711.
	HOXG		Endogenous sources of heme in neurons and glia would be derived mainly from cytoplasmic heme proteins and mitochondrial cytochromes and would be involved in the normal turnover of the heme-containing proteins. Exogenous sources of heme could be derived from the death of neighboring cells that would release their heme proteins or from heme derived from hemoglobin that occurs following ICH or SAH i…	PMID: 12796711.
	UGT1A10r		Endogenous sources of heme in neurons and glia would be derived mainly from cytoplasmic heme proteins and mitochondrial cytochromes and would be involved in the normal turnover of the heme-containing proteins. Exogenous sources of heme could be derived from the death of neighboring cells that would release their heme proteins or from heme derived from hemoglobin that occurs following ICH or SAH i…	PMID: 12796711.
	UGT1A2r		Endogenous sources of heme in neurons and glia would be derived mainly from cytoplasmic heme proteins and mitochondrial cytochromes and would be involved in the normal turnover of the heme-containing proteins. Exogenous sources of heme could be derived from the death of neighboring cells that would release their heme proteins or from heme derived from hemoglobin that occurs following ICH or SAH i…	PMID: 12796711.
	r0813		Endogenous sources of heme in neurons and glia would be derived mainly from cytoplasmic heme proteins and mitochondrial cytochromes and would be involved in the normal turnover of the heme-containing proteins. Exogenous sources of heme could be derived from the death of neighboring cells that would release their heme proteins or from heme derived from hemoglobin that occurs following ICH or SAH i…	PMID: 12796711.
	BIDGLCURr		Endogenous sources of heme in neurons and glia would be derived mainly from cytoplasmic heme proteins and mitochondrial cytochromes and would be involved in the normal turnover of the heme-containing proteins. Exogenous sources of heme could be derived from the death of neighboring cells that would release their heme proteins or from heme derived from hemoglobin that occurs following ICH or SAH i…	PMID: 12796711.
ubiquinone synthesis	DPPS		The brain has complete enzymatic systems for biosynthesis of the mevalonate pathway lipids, cholesterol, ubiquinone, dolichol and dolichyl-P.	PMID: 2387395.
	TYRTAm		The brain has complete enzymatic systems for biosynthesis of the mevalonate pathway lipids, cholesterol, ubiquinone, dolichol and dolichyl-P.	PMID: 2387395.
	3DPHBH1		The brain has complete enzymatic systems for biosynthesis of the mevalonate pathway lipids, cholesterol, ubiquinone, dolichol and dolichyl-P.	PMID: 2387395.
	3DPHBH2		The brain has complete enzymatic systems for biosynthesis of the mevalonate pathway lipids, cholesterol, ubiquinone, dolichol and dolichyl-P.	PMID: 2387395.
	4HBZCOAFm		The brain has complete enzymatic systems for biosynthesis of the mevalonate pathway lipids, cholesterol, ubiquinone, dolichol and dolichyl-P.	PMID: 2387395.
	4HBZFm		The brain has complete enzymatic systems for biosynthesis of the mevalonate pathway lipids, cholesterol, ubiquinone, dolichol and dolichyl-P.	PMID: 2387395.
	COQ3m		The brain has complete enzymatic systems for biosynthesis of the mevalonate pathway lipids, cholesterol, ubiquinone, dolichol and dolichyl-P.	PMID: 2387395.
	COQ5m		The brain has complete enzymatic systems for biosynthesis of the mevalonate pathway lipids, cholesterol, ubiquinone, dolichol and dolichyl-P.	PMID: 2387395.
	COQ6m		The brain has complete enzymatic systems for biosynthesis of the mevalonate pathway lipids, cholesterol, ubiquinone, dolichol and dolichyl-P.	PMID: 2387395.
	COQ7m		The brain has complete enzymatic systems for biosynthesis of the mevalonate pathway lipids, cholesterol, ubiquinone, dolichol and dolichyl-P.	PMID: 2387395.
	COUCOAFm		The brain has complete enzymatic systems for biosynthesis of the mevalonate pathway lipids, cholesterol, ubiquinone, dolichol and dolichyl-P.	PMID: 2387395.
	DHDPBMTm		The brain has complete enzymatic systems for biosynthesis of the mevalonate pathway lipids, cholesterol, ubiquinone, dolichol and dolichyl-P.	PMID: 2387395.
	DPHMBDCm		The brain has complete enzymatic systems for biosynthesis of the mevalonate pathway lipids, cholesterol, ubiquinone, dolichol and dolichyl-P.	PMID: 2387395.
	HBZOPT10m		The brain has complete enzymatic systems for biosynthesis of the mevalonate pathway lipids, cholesterol, ubiquinone, dolichol and dolichyl-P.	PMID: 2387395.
	T4HCINNMFM		The brain has complete enzymatic systems for biosynthesis of the mevalonate pathway lipids, cholesterol, ubiquinone, dolichol and dolichyl-P.	PMID: 2387395.
	SPODMe		IT	http://europepmc.org/articles/PMC425307;jsessionid=6n8PV5zbvgRmqXzi0ySP.9
betaoxidation		FAOXC102C103m	When glucose production is insufficient, the body shifts to a lipid-based economy. However, the brain cannot oxidize fatty acids for energy, so the production of ketones is protective (1, 2). In summary, the slow rate of b-oxidation of fatty acids seems to be a unique intrinsic feature of the brain tissue, particularly of the mitochondria of neurons. For comparison, in the heart and kidney tissue…	PMID: 22833869, PMID: 23921897,
		FAOXC102C103x	When glucose production is insufficient, the body shifts to a lipid-based economy. However, the brain cannot oxidize fatty acids for energy, so the production of ketones is protective (1, 2). In summary, the slow rate of b-oxidation of fatty acids seems to be a unique intrinsic feature of the brain tissue, particularly of the mitochondria of neurons. For comparison, in the heart and kidney tissue…	PMID: 22833869, PMID: 23921897,
		FAOXC102m	When glucose production is insufficient, the body shifts to a lipid-based economy. However, the brain cannot oxidize fatty acids for energy, so the production of ketones is protective (1, 2). In summary, the slow rate of b-oxidation of fatty acids seems to be a unique intrinsic feature of the brain tissue, particularly of the mitochondria of neurons. For comparison, in the heart and kidney tissue…	PMID: 22833869, PMID: 23921897,
		FAOXC102x	When glucose production is insufficient, the body shifts to a lipid-based economy. However, the brain cannot oxidize fatty acids for energy, so the production of ketones is protective (1, 2). In summary, the slow rate of b-oxidation of fatty acids seems to be a unique intrinsic feature of the brain tissue, particularly of the mitochondria of neurons. For comparison, in the heart and kidney tissue…	PMID: 22833869, PMID: 23921897,
		FAOXC103C102m	When glucose production is insufficient, the body shifts to a lipid-based economy. However, the brain cannot oxidize fatty acids for energy, so the production of ketones is protective (1, 2). In summary, the slow rate of b-oxidation of fatty acids seems to be a unique intrinsic feature of the brain tissue, particularly of the mitochondria of neurons. For comparison, in the heart and kidney tissue…	PMID: 22833869, PMID: 23921897,
		FAOXC103C102x	When glucose production is insufficient, the body shifts to a lipid-based economy. However, the brain cannot oxidize fatty acids for energy, so the production of ketones is protective (1, 2). In summary, the slow rate of b-oxidation of fatty acids seems to be a unique intrinsic feature of the brain tissue, particularly of the mitochondria of neurons. For comparison, in the heart and kidney tissue…	PMID: 22833869, PMID: 23921897,
		FAOXC102C101m	When glucose production is insufficient, the body shifts to a lipid-based economy. However, the brain cannot oxidize fatty acids for energy, so the production of ketones is protective (1, 2). In summary, the slow rate of b-oxidation of fatty acids seems to be a unique intrinsic feature of the brain tissue, particularly of the mitochondria of neurons. For comparison, in the heart and kidney tissue…	PMID: 22833869, PMID: 23921897,
		FAOXC102C101x	When glucose production is insufficient, the body shifts to a lipid-based economy. However, the brain cannot oxidize fatty acids for energy, so the production of ketones is protective (1, 2). In summary, the slow rate of b-oxidation of fatty acids seems to be a unique intrinsic feature of the brain tissue, particularly of the mitochondria of neurons. For comparison, in the heart and kidney tissue…	PMID: 22833869, PMID: 23921897,
		FAOXC10C10OHm	When glucose production is insufficient, the body shifts to a lipid-based economy. However, the brain cannot oxidize fatty acids for energy, so the production of ketones is protective (1, 2). In summary, the slow rate of b-oxidation of fatty acids seems to be a unique intrinsic feature of the brain tissue, particularly of the mitochondria of neurons. For comparison, in the heart and kidney tissue…	PMID: 22833869, PMID: 23921897,
		FAOXC102C81m	When glucose production is insufficient, the body shifts to a lipid-based economy. However, the brain cannot oxidize fatty acids for energy, so the production of ketones is protective (1, 2). In summary, the slow rate of b-oxidation of fatty acids seems to be a unique intrinsic feature of the brain tissue, particularly of the mitochondria of neurons. For comparison, in the heart and kidney tissue…	PMID: 22833869, PMID: 23921897,
		FAOXC102C81x	When glucose production is insufficient, the body shifts to a lipid-based economy. However, the brain cannot oxidize fatty acids for energy, so the production of ketones is protective (1, 2). In summary, the slow rate of b-oxidation of fatty acids seems to be a unique intrinsic feature of the brain tissue, particularly of the mitochondria of neurons. For comparison, in the heart and kidney tissue…	PMID: 22833869, PMID: 23921897,
		FAOXC11C9m	When glucose production is insufficient, the body shifts to a lipid-based economy. However, the brain cannot oxidize fatty acids for energy, so the production of ketones is protective (1, 2). In summary, the slow rate of b-oxidation of fatty acids seems to be a unique intrinsic feature of the brain tissue, particularly of the mitochondria of neurons. For comparison, in the heart and kidney tissue…	PMID: 22833869, PMID: 23921897,
		FAOXC10C8m	When glucose production is insufficient, the body shifts to a lipid-based economy. However, the brain cannot oxidize fatty acids for energy, so the production of ketones is protective (1, 2). In summary, the slow rate of b-oxidation of fatty acids seems to be a unique intrinsic feature of the brain tissue, particularly of the mitochondria of neurons. For comparison, in the heart and kidney tissue…	PMID: 22833869, PMID: 23921897,
		FAOXC10C8x	When glucose production is insufficient, the body shifts to a lipid-based economy. However, the brain cannot oxidize fatty acids for energy, so the production of ketones is protective (1, 2). In summary, the slow rate of b-oxidation of fatty acids seems to be a unique intrinsic feature of the brain tissue, particularly of the mitochondria of neurons. For comparison, in the heart and kidney tissue…	PMID: 22833869, PMID: 23921897,
		FAOXC11BRC9BRx	When glucose production is insufficient, the body shifts to a lipid-based economy. However, the brain cannot oxidize fatty acids for energy, so the production of ketones is protective (1, 2). In summary, the slow rate of b-oxidation of fatty acids seems to be a unique intrinsic feature of the brain tissue, particularly of the mitochondria of neurons. For comparison, in the heart and kidney tissue…	PMID: 22833869, PMID: 23921897,
		FAOXC10DCC8DCx	When glucose production is insufficient, the body shifts to a lipid-based economy. However, the brain cannot oxidize fatty acids for energy, so the production of ketones is protective (1, 2). In summary, the slow rate of b-oxidation of fatty acids seems to be a unique intrinsic feature of the brain tissue, particularly of the mitochondria of neurons. For comparison, in the heart and kidney tissue…	PMID: 22833869, PMID: 23921897,
		FAOXC101m	When glucose production is insufficient, the body shifts to a lipid-based economy. However, the brain cannot oxidize fatty acids for energy, so the production of ketones is protective (1, 2). In summary, the slow rate of b-oxidation of fatty acids seems to be a unique intrinsic feature of the brain tissue, particularly of the mitochondria of neurons. For comparison, in the heart and kidney tissue…	PMID: 22833869, PMID: 23921897,
		FAOXC101x	When glucose production is insufficient, the body shifts to a lipid-based economy. However, the brain cannot oxidize fatty acids for energy, so the production of ketones is protective (1, 2). In summary, the slow rate of b-oxidation of fatty acids seems to be a unique intrinsic feature of the brain tissue, particularly of the mitochondria of neurons. For comparison, in the heart and kidney tissue…	PMID: 22833869, PMID: 23921897,
		RE1522M	When glucose production is insufficient, the body shifts to a lipid-based economy. However, the brain cannot oxidize fatty acids for energy, so the production of ketones is protective (1, 2). In summary, the slow rate of b-oxidation of fatty acids seems to be a unique intrinsic feature of the brain tissue, particularly of the mitochondria of neurons. For comparison, in the heart and kidney tissue…	PMID: 22833869, PMID: 23921897,
		RE1522X	When glucose production is insufficient, the body shifts to a lipid-based economy. However, the brain cannot oxidize fatty acids for energy, so the production of ketones is protective (1, 2). In summary, the slow rate of b-oxidation of fatty acids seems to be a unique intrinsic feature of the brain tissue, particularly of the mitochondria of neurons. For comparison, in the heart and kidney tissue…	PMID: 22833869, PMID: 23921897,
		RE3004M	When glucose production is insufficient, the body shifts to a lipid-based economy. However, the brain cannot oxidize fatty acids for energy, so the production of ketones is protective (1, 2). In summary, the slow rate of b-oxidation of fatty acids seems to be a unique intrinsic feature of the brain tissue, particularly of the mitochondria of neurons. For comparison, in the heart and kidney tissue…	PMID: 22833869, PMID: 23921897,
		RE3140X	When glucose production is insufficient, the body shifts to a lipid-based economy. However, the brain cannot oxidize fatty acids for energy, so the production of ketones is protective (1, 2). In summary, the slow rate of b-oxidation of fatty acids seems to be a unique intrinsic feature of the brain tissue, particularly of the mitochondria of neurons. For comparison, in the heart and kidney tissue…	PMID: 22833869, PMID: 23921897,
		FAOXC221C201x	When glucose production is insufficient, the body shifts to a lipid-based economy. However, the brain cannot oxidize fatty acids for energy, so the production of ketones is protective (1, 2). In summary, the slow rate of b-oxidation of fatty acids seems to be a unique intrinsic feature of the brain tissue, particularly of the mitochondria of neurons. For comparison, in the heart and kidney tissue…	PMID: 22833869, PMID: 23921897,
		FAOXC241C221x	When glucose production is insufficient, the body shifts to a lipid-based economy. However, the brain cannot oxidize fatty acids for energy, so the production of ketones is protective (1, 2). In summary, the slow rate of b-oxidation of fatty acids seems to be a unique intrinsic feature of the brain tissue, particularly of the mitochondria of neurons. For comparison, in the heart and kidney tissue…	PMID: 22833869, PMID: 23921897,
		RE3189M	When glucose production is insufficient, the body shifts to a lipid-based economy. However, the brain cannot oxidize fatty acids for energy, so the production of ketones is protective (1, 2). In summary, the slow rate of b-oxidation of fatty acids seems to be a unique intrinsic feature of the brain tissue, particularly of the mitochondria of neurons. For comparison, in the heart and kidney tissue…	PMID: 22833869, PMID: 23921897,
		RE3195M	When glucose production is insufficient, the body shifts to a lipid-based economy. However, the brain cannot oxidize fatty acids for energy, so the production of ketones is protective (1, 2). In summary, the slow rate of b-oxidation of fatty acids seems to be a unique intrinsic feature of the brain tissue, particularly of the mitochondria of neurons. For comparison, in the heart and kidney tissue…	PMID: 22833869, PMID: 23921897,
		FAOXC226C227m	When glucose production is insufficient, the body shifts to a lipid-based economy. However, the brain cannot oxidize fatty acids for energy, so the production of ketones is protective (1, 2). In summary, the slow rate of b-oxidation of fatty acids seems to be a unique intrinsic feature of the brain tissue, particularly of the mitochondria of neurons. For comparison, in the heart and kidney tissue…	PMID: 22833869, PMID: 23921897,
		FAOXC225C226m	When glucose production is insufficient, the body shifts to a lipid-based economy. However, the brain cannot oxidize fatty acids for energy, so the production of ketones is protective (1, 2). In summary, the slow rate of b-oxidation of fatty acids seems to be a unique intrinsic feature of the brain tissue, particularly of the mitochondria of neurons. For comparison, in the heart and kidney tissue…	PMID: 22833869, PMID: 23921897,
		FAOXC225C226x	When glucose production is insufficient, the body shifts to a lipid-based economy. However, the brain cannot oxidize fatty acids for energy, so the production of ketones is protective (1, 2). In summary, the slow rate of b-oxidation of fatty acids seems to be a unique intrinsic feature of the brain tissue, particularly of the mitochondria of neurons. For comparison, in the heart and kidney tissue…	PMID: 22833869, PMID: 23921897,
		FAOXC164C165x	When glucose production is insufficient, the body shifts to a lipid-based economy. However, the brain cannot oxidize fatty acids for energy, so the production of ketones is protective (1, 2). In summary, the slow rate of b-oxidation of fatty acids seems to be a unique intrinsic feature of the brain tissue, particularly of the mitochondria of neurons. For comparison, in the heart and kidney tissue…	PMID: 22833869, PMID: 23921897,
		FAOXC164C165m	When glucose production is insufficient, the body shifts to a lipid-based economy. However, the brain cannot oxidize fatty acids for energy, so the production of ketones is protective (1, 2). In summary, the slow rate of b-oxidation of fatty acids seems to be a unique intrinsic feature of the brain tissue, particularly of the mitochondria of neurons. For comparison, in the heart and kidney tissue…	PMID: 22833869, PMID: 23921897,
		FAOXC163C164Gm	When glucose production is insufficient, the body shifts to a lipid-based economy. However, the brain cannot oxidize fatty acids for energy, so the production of ketones is protective (1, 2). In summary, the slow rate of b-oxidation of fatty acids seems to be a unique intrinsic feature of the brain tissue, particularly of the mitochondria of neurons. For comparison, in the heart and kidney tissue…	PMID: 22833869, PMID: 23921897,
		FAOXC163C164x	When glucose production is insufficient, the body shifts to a lipid-based economy. However, the brain cannot oxidize fatty acids for energy, so the production of ketones is protective (1, 2). In summary, the slow rate of b-oxidation of fatty acids seems to be a unique intrinsic feature of the brain tissue, particularly of the mitochondria of neurons. For comparison, in the heart and kidney tissue…	PMID: 22833869, PMID: 23921897,
		RE2994X	When glucose production is insufficient, the body shifts to a lipid-based economy. However, the brain cannot oxidize fatty acids for energy, so the production of ketones is protective (1, 2). In summary, the slow rate of b-oxidation of fatty acids seems to be a unique intrinsic feature of the brain tissue, particularly of the mitochondria of neurons. For comparison, in the heart and kidney tissue…	PMID: 22833869, PMID: 23921897,
		FAOXC101C102m	When glucose production is insufficient, the body shifts to a lipid-based economy. However, the brain cannot oxidize fatty acids for energy, so the production of ketones is protective (1, 2). In summary, the slow rate of b-oxidation of fatty acids seems to be a unique intrinsic feature of the brain tissue, particularly of the mitochondria of neurons. For comparison, in the heart and kidney tissue…	PMID: 22833869, PMID: 23921897,
		FAOXC101C102x	When glucose production is insufficient, the body shifts to a lipid-based economy. However, the brain cannot oxidize fatty acids for energy, so the production of ketones is protective (1, 2). In summary, the slow rate of b-oxidation of fatty acids seems to be a unique intrinsic feature of the brain tissue, particularly of the mitochondria of neurons. For comparison, in the heart and kidney tissue…	PMID: 22833869, PMID: 23921897,
		FAOXC204C205x	When glucose production is insufficient, the body shifts to a lipid-based economy. However, the brain cannot oxidize fatty acids for energy, so the production of ketones is protective (1, 2). In summary, the slow rate of b-oxidation of fatty acids seems to be a unique intrinsic feature of the brain tissue, particularly of the mitochondria of neurons. For comparison, in the heart and kidney tissue…	PMID: 22833869, PMID: 23921897,
		FAOXC11	When glucose production is insufficient, the body shifts to a lipid-based economy. However, the brain cannot oxidize fatty acids for energy, so the production of ketones is protective (1, 2). In summary, the slow rate of b-oxidation of fatty acids seems to be a unique intrinsic feature of the brain tissue, particularly of the mitochondria of neurons. For comparison, in the heart and kidney tissue…	PMID: 22833869, PMID: 23921897,
		FAOXC13C11m	When glucose production is insufficient, the body shifts to a lipid-based economy. However, the brain cannot oxidize fatty acids for energy, so the production of ketones is protective (1, 2). In summary, the slow rate of b-oxidation of fatty acids seems to be a unique intrinsic feature of the brain tissue, particularly of the mitochondria of neurons. For comparison, in the heart and kidney tissue…	PMID: 22833869, PMID: 23921897,
		FAOXC13BRC11BRx	When glucose production is insufficient, the body shifts to a lipid-based economy. However, the brain cannot oxidize fatty acids for energy, so the production of ketones is protective (1, 2). In summary, the slow rate of b-oxidation of fatty acids seems to be a unique intrinsic feature of the brain tissue, particularly of the mitochondria of neurons. For comparison, in the heart and kidney tissue…	PMID: 22833869, PMID: 23921897,
		RE3089X	When glucose production is insufficient, the body shifts to a lipid-based economy. However, the brain cannot oxidize fatty acids for energy, so the production of ketones is protective (1, 2). In summary, the slow rate of b-oxidation of fatty acids seems to be a unique intrinsic feature of the brain tissue, particularly of the mitochondria of neurons. For comparison, in the heart and kidney tissue…	PMID: 22833869, PMID: 23921897,
		RE3083X	When glucose production is insufficient, the body shifts to a lipid-based economy. However, the brain cannot oxidize fatty acids for energy, so the production of ketones is protective (1, 2). In summary, the slow rate of b-oxidation of fatty acids seems to be a unique intrinsic feature of the brain tissue, particularly of the mitochondria of neurons. For comparison, in the heart and kidney tissue…	PMID: 22833869, PMID: 23921897,
		RE3097X	When glucose production is insufficient, the body shifts to a lipid-based economy. However, the brain cannot oxidize fatty acids for energy, so the production of ketones is protective (1, 2). In summary, the slow rate of b-oxidation of fatty acids seems to be a unique intrinsic feature of the brain tissue, particularly of the mitochondria of neurons. For comparison, in the heart and kidney tissue…	PMID: 22833869, PMID: 23921897,
		FAOXC185m	When glucose production is insufficient, the body shifts to a lipid-based economy. However, the brain cannot oxidize fatty acids for energy, so the production of ketones is protective (1, 2). In summary, the slow rate of b-oxidation of fatty acids seems to be a unique intrinsic feature of the brain tissue, particularly of the mitochondria of neurons. For comparison, in the heart and kidney tissue…	PMID: 22833869, PMID: 23921897,
		FAOXC184m	When glucose production is insufficient, the body shifts to a lipid-based economy. However, the brain cannot oxidize fatty acids for energy, so the production of ketones is protective (1, 2). In summary, the slow rate of b-oxidation of fatty acids seems to be a unique intrinsic feature of the brain tissue, particularly of the mitochondria of neurons. For comparison, in the heart and kidney tissue…	PMID: 22833869, PMID: 23921897,
		FAOXC184x	When glucose production is insufficient, the body shifts to a lipid-based economy. However, the brain cannot oxidize fatty acids for energy, so the production of ketones is protective (1, 2). In summary, the slow rate of b-oxidation of fatty acids seems to be a unique intrinsic feature of the brain tissue, particularly of the mitochondria of neurons. For comparison, in the heart and kidney tissue…	PMID: 22833869, PMID: 23921897,
		RE2997X	When glucose production is insufficient, the body shifts to a lipid-based economy. However, the brain cannot oxidize fatty acids for energy, so the production of ketones is protective (1, 2). In summary, the slow rate of b-oxidation of fatty acids seems to be a unique intrinsic feature of the brain tissue, particularly of the mitochondria of neurons. For comparison, in the heart and kidney tissue…	PMID: 22833869, PMID: 23921897,
		FAOXC123m	When glucose production is insufficient, the body shifts to a lipid-based economy. However, the brain cannot oxidize fatty acids for energy, so the production of ketones is protective (1, 2). In summary, the slow rate of b-oxidation of fatty acids seems to be a unique intrinsic feature of the brain tissue, particularly of the mitochondria of neurons. For comparison, in the heart and kidney tissue…	PMID: 22833869, PMID: 23921897,
		FAOXC123x	When glucose production is insufficient, the body shifts to a lipid-based economy. However, the brain cannot oxidize fatty acids for energy, so the production of ketones is protective (1, 2). In summary, the slow rate of b-oxidation of fatty acids seems to be a unique intrinsic feature of the brain tissue, particularly of the mitochondria of neurons. For comparison, in the heart and kidney tissue…	PMID: 22833869, PMID: 23921897,
		FAOXC9BRC7BRm	When glucose production is insufficient, the body shifts to a lipid-based economy. However, the brain cannot oxidize fatty acids for energy, so the production of ketones is protective (1, 2). In summary, the slow rate of b-oxidation of fatty acids seems to be a unique intrinsic feature of the brain tissue, particularly of the mitochondria of neurons. For comparison, in the heart and kidney tissue…	PMID: 22833869, PMID: 23921897,
		RE3185M	When glucose production is insufficient, the body shifts to a lipid-based economy. However, the brain cannot oxidize fatty acids for energy, so the production of ketones is protective (1, 2). In summary, the slow rate of b-oxidation of fatty acids seems to be a unique intrinsic feature of the brain tissue, particularly of the mitochondria of neurons. For comparison, in the heart and kidney tissue…	PMID: 22833869, PMID: 23921897,
		FAOXC122m	When glucose production is insufficient, the body shifts to a lipid-based economy. However, the brain cannot oxidize fatty acids for energy, so the production of ketones is protective (1, 2). In summary, the slow rate of b-oxidation of fatty acids seems to be a unique intrinsic feature of the brain tissue, particularly of the mitochondria of neurons. For comparison, in the heart and kidney tissue…	PMID: 22833869, PMID: 23921897,
		FAOXC122x	When glucose production is insufficient, the body shifts to a lipid-based economy. However, the brain cannot oxidize fatty acids for energy, so the production of ketones is protective (1, 2). In summary, the slow rate of b-oxidation of fatty acids seems to be a unique intrinsic feature of the brain tissue, particularly of the mitochondria of neurons. For comparison, in the heart and kidney tissue…	PMID: 22833869, PMID: 23921897,
		FAOXC226m	When glucose production is insufficient, the body shifts to a lipid-based economy. However, the brain cannot oxidize fatty acids for energy, so the production of ketones is protective (1, 2). In summary, the slow rate of b-oxidation of fatty acids seems to be a unique intrinsic feature of the brain tissue, particularly of the mitochondria of neurons. For comparison, in the heart and kidney tissue…	PMID: 22833869, PMID: 23921897,
		FAOXC225m	When glucose production is insufficient, the body shifts to a lipid-based economy. However, the brain cannot oxidize fatty acids for energy, so the production of ketones is protective (1, 2). In summary, the slow rate of b-oxidation of fatty acids seems to be a unique intrinsic feature of the brain tissue, particularly of the mitochondria of neurons. For comparison, in the heart and kidney tissue…	PMID: 22833869, PMID: 23921897,
		FAOXC225x	When glucose production is insufficient, the body shifts to a lipid-based economy. However, the brain cannot oxidize fatty acids for energy, so the production of ketones is protective (1, 2). In summary, the slow rate of b-oxidation of fatty acids seems to be a unique intrinsic feature of the brain tissue, particularly of the mitochondria of neurons. For comparison, in the heart and kidney tissue…	PMID: 22833869, PMID: 23921897,
		FAOXC164m	When glucose production is insufficient, the body shifts to a lipid-based economy. However, the brain cannot oxidize fatty acids for energy, so the production of ketones is protective (1, 2). In summary, the slow rate of b-oxidation of fatty acids seems to be a unique intrinsic feature of the brain tissue, particularly of the mitochondria of neurons. For comparison, in the heart and kidney tissue…	PMID: 22833869, PMID: 23921897,
		FAOXC164x	When glucose production is insufficient, the body shifts to a lipid-based economy. However, the brain cannot oxidize fatty acids for energy, so the production of ketones is protective (1, 2). In summary, the slow rate of b-oxidation of fatty acids seems to be a unique intrinsic feature of the brain tissue, particularly of the mitochondria of neurons. For comparison, in the heart and kidney tissue…	PMID: 22833869, PMID: 23921897,
		FAOXC163Gm	When glucose production is insufficient, the body shifts to a lipid-based economy. However, the brain cannot oxidize fatty acids for energy, so the production of ketones is protective (1, 2). In summary, the slow rate of b-oxidation of fatty acids seems to be a unique intrinsic feature of the brain tissue, particularly of the mitochondria of neurons. For comparison, in the heart and kidney tissue…	PMID: 22833869, PMID: 23921897,
		FAOXC163x	When glucose production is insufficient, the body shifts to a lipid-based economy. However, the brain cannot oxidize fatty acids for energy, so the production of ketones is protective (1, 2). In summary, the slow rate of b-oxidation of fatty acids seems to be a unique intrinsic feature of the brain tissue, particularly of the mitochondria of neurons. For comparison, in the heart and kidney tissue…	PMID: 22833869, PMID: 23921897,
		RE3248M	When glucose production is insufficient, the body shifts to a lipid-based economy. However, the brain cannot oxidize fatty acids for energy, so the production of ketones is protective (1, 2). In summary, the slow rate of b-oxidation of fatty acids seems to be a unique intrinsic feature of the brain tissue, particularly of the mitochondria of neurons. For comparison, in the heart and kidney tissue…	PMID: 22833869, PMID: 23921897,
		RE3248X	When glucose production is insufficient, the body shifts to a lipid-based economy. However, the brain cannot oxidize fatty acids for energy, so the production of ketones is protective (1, 2). In summary, the slow rate of b-oxidation of fatty acids seems to be a unique intrinsic feature of the brain tissue, particularly of the mitochondria of neurons. For comparison, in the heart and kidney tissue…	PMID: 22833869, PMID: 23921897,
		RE3250C	When glucose production is insufficient, the body shifts to a lipid-based economy. However, the brain cannot oxidize fatty acids for energy, so the production of ketones is protective (1, 2). In summary, the slow rate of b-oxidation of fatty acids seems to be a unique intrinsic feature of the brain tissue, particularly of the mitochondria of neurons. For comparison, in the heart and kidney tissue…	PMID: 22833869, PMID: 23921897,
		RE3250M	When glucose production is insufficient, the body shifts to a lipid-based economy. However, the brain cannot oxidize fatty acids for energy, so the production of ketones is protective (1, 2). In summary, the slow rate of b-oxidation of fatty acids seems to be a unique intrinsic feature of the brain tissue, particularly of the mitochondria of neurons. For comparison, in the heart and kidney tissue…	PMID: 22833869, PMID: 23921897,
		RE3250X	When glucose production is insufficient, the body shifts to a lipid-based economy. However, the brain cannot oxidize fatty acids for energy, so the production of ketones is protective (1, 2). In summary, the slow rate of b-oxidation of fatty acids seems to be a unique intrinsic feature of the brain tissue, particularly of the mitochondria of neurons. For comparison, in the heart and kidney tissue…	PMID: 22833869, PMID: 23921897,
		RE3087X	When glucose production is insufficient, the body shifts to a lipid-based economy. However, the brain cannot oxidize fatty acids for energy, so the production of ketones is protective (1, 2). In summary, the slow rate of b-oxidation of fatty acids seems to be a unique intrinsic feature of the brain tissue, particularly of the mitochondria of neurons. For comparison, in the heart and kidney tissue…	PMID: 22833869, PMID: 23921897,
		RE3081X	When glucose production is insufficient, the body shifts to a lipid-based economy. However, the brain cannot oxidize fatty acids for energy, so the production of ketones is protective (1, 2). In summary, the slow rate of b-oxidation of fatty acids seems to be a unique intrinsic feature of the brain tissue, particularly of the mitochondria of neurons. For comparison, in the heart and kidney tissue…	PMID: 22833869, PMID: 23921897,
		RE2921M	When glucose production is insufficient, the body shifts to a lipid-based economy. However, the brain cannot oxidize fatty acids for energy, so the production of ketones is protective (1, 2). In summary, the slow rate of b-oxidation of fatty acids seems to be a unique intrinsic feature of the brain tissue, particularly of the mitochondria of neurons. For comparison, in the heart and kidney tissue…	PMID: 22833869, PMID: 23921897,
		RE2921X	When glucose production is insufficient, the body shifts to a lipid-based economy. However, the brain cannot oxidize fatty acids for energy, so the production of ketones is protective (1, 2). In summary, the slow rate of b-oxidation of fatty acids seems to be a unique intrinsic feature of the brain tissue, particularly of the mitochondria of neurons. For comparison, in the heart and kidney tissue…	PMID: 22833869, PMID: 23921897,
		RE3193M	When glucose production is insufficient, the body shifts to a lipid-based economy. However, the brain cannot oxidize fatty acids for energy, so the production of ketones is protective (1, 2). In summary, the slow rate of b-oxidation of fatty acids seems to be a unique intrinsic feature of the brain tissue, particularly of the mitochondria of neurons. For comparison, in the heart and kidney tissue…	PMID: 22833869, PMID: 23921897,
		RE3192M	When glucose production is insufficient, the body shifts to a lipid-based economy. However, the brain cannot oxidize fatty acids for energy, so the production of ketones is protective (1, 2). In summary, the slow rate of b-oxidation of fatty acids seems to be a unique intrinsic feature of the brain tissue, particularly of the mitochondria of neurons. For comparison, in the heart and kidney tissue…	PMID: 22833869, PMID: 23921897,
		RE3194M	When glucose production is insufficient, the body shifts to a lipid-based economy. However, the brain cannot oxidize fatty acids for energy, so the production of ketones is protective (1, 2). In summary, the slow rate of b-oxidation of fatty acids seems to be a unique intrinsic feature of the brain tissue, particularly of the mitochondria of neurons. For comparison, in the heart and kidney tissue…	PMID: 22833869, PMID: 23921897,
		RE1521M	When glucose production is insufficient, the body shifts to a lipid-based economy. However, the brain cannot oxidize fatty acids for energy, so the production of ketones is protective (1, 2). In summary, the slow rate of b-oxidation of fatty acids seems to be a unique intrinsic feature of the brain tissue, particularly of the mitochondria of neurons. For comparison, in the heart and kidney tissue…	PMID: 22833869, PMID: 23921897,
		RE1521X	When glucose production is insufficient, the body shifts to a lipid-based economy. However, the brain cannot oxidize fatty acids for energy, so the production of ketones is protective (1, 2). In summary, the slow rate of b-oxidation of fatty acids seems to be a unique intrinsic feature of the brain tissue, particularly of the mitochondria of neurons. For comparison, in the heart and kidney tissue…	PMID: 22833869, PMID: 23921897,
		RE2986X	When glucose production is insufficient, the body shifts to a lipid-based economy. However, the brain cannot oxidize fatty acids for energy, so the production of ketones is protective (1, 2). In summary, the slow rate of b-oxidation of fatty acids seems to be a unique intrinsic feature of the brain tissue, particularly of the mitochondria of neurons. For comparison, in the heart and kidney tissue…	PMID: 22833869, PMID: 23921897,
		RE3159X	When glucose production is insufficient, the body shifts to a lipid-based economy. However, the brain cannot oxidize fatty acids for energy, so the production of ketones is protective (1, 2). In summary, the slow rate of b-oxidation of fatty acids seems to be a unique intrinsic feature of the brain tissue, particularly of the mitochondria of neurons. For comparison, in the heart and kidney tissue…	PMID: 22833869, PMID: 23921897,
		RE3443M	When glucose production is insufficient, the body shifts to a lipid-based economy. However, the brain cannot oxidize fatty acids for energy, so the production of ketones is protective (1, 2). In summary, the slow rate of b-oxidation of fatty acids seems to be a unique intrinsic feature of the brain tissue, particularly of the mitochondria of neurons. For comparison, in the heart and kidney tissue…	PMID: 22833869, PMID: 23921897,
		RE3443X	When glucose production is insufficient, the body shifts to a lipid-based economy. However, the brain cannot oxidize fatty acids for energy, so the production of ketones is protective (1, 2). In summary, the slow rate of b-oxidation of fatty acids seems to be a unique intrinsic feature of the brain tissue, particularly of the mitochondria of neurons. For comparison, in the heart and kidney tissue…	PMID: 22833869, PMID: 23921897,
		RE3337M	When glucose production is insufficient, the body shifts to a lipid-based economy. However, the brain cannot oxidize fatty acids for energy, so the production of ketones is protective (1, 2). In summary, the slow rate of b-oxidation of fatty acids seems to be a unique intrinsic feature of the brain tissue, particularly of the mitochondria of neurons. For comparison, in the heart and kidney tissue…	PMID: 22833869, PMID: 23921897,
		RE3344M	When glucose production is insufficient, the body shifts to a lipid-based economy. However, the brain cannot oxidize fatty acids for energy, so the production of ketones is protective (1, 2). In summary, the slow rate of b-oxidation of fatty acids seems to be a unique intrinsic feature of the brain tissue, particularly of the mitochondria of neurons. For comparison, in the heart and kidney tissue…	PMID: 22833869, PMID: 23921897,
		RE3337X	When glucose production is insufficient, the body shifts to a lipid-based economy. However, the brain cannot oxidize fatty acids for energy, so the production of ketones is protective (1, 2). In summary, the slow rate of b-oxidation of fatty acids seems to be a unique intrinsic feature of the brain tissue, particularly of the mitochondria of neurons. For comparison, in the heart and kidney tissue…	PMID: 22833869, PMID: 23921897,
		RE3344X	When glucose production is insufficient, the body shifts to a lipid-based economy. However, the brain cannot oxidize fatty acids for energy, so the production of ketones is protective (1, 2). In summary, the slow rate of b-oxidation of fatty acids seems to be a unique intrinsic feature of the brain tissue, particularly of the mitochondria of neurons. For comparison, in the heart and kidney tissue…	PMID: 22833869, PMID: 23921897,
		RE3447M	When glucose production is insufficient, the body shifts to a lipid-based economy. However, the brain cannot oxidize fatty acids for energy, so the production of ketones is protective (1, 2). In summary, the slow rate of b-oxidation of fatty acids seems to be a unique intrinsic feature of the brain tissue, particularly of the mitochondria of neurons. For comparison, in the heart and kidney tissue…	PMID: 22833869, PMID: 23921897,
		RE3447X	When glucose production is insufficient, the body shifts to a lipid-based economy. However, the brain cannot oxidize fatty acids for energy, so the production of ketones is protective (1, 2). In summary, the slow rate of b-oxidation of fatty acids seems to be a unique intrinsic feature of the brain tissue, particularly of the mitochondria of neurons. For comparison, in the heart and kidney tissue…	PMID: 22833869, PMID: 23921897,
		RE2999M	When glucose production is insufficient, the body shifts to a lipid-based economy. However, the brain cannot oxidize fatty acids for energy, so the production of ketones is protective (1, 2). In summary, the slow rate of b-oxidation of fatty acids seems to be a unique intrinsic feature of the brain tissue, particularly of the mitochondria of neurons. For comparison, in the heart and kidney tissue…	PMID: 22833869, PMID: 23921897,
		RE3338C	When glucose production is insufficient, the body shifts to a lipid-based economy. However, the brain cannot oxidize fatty acids for energy, so the production of ketones is protective (1, 2). In summary, the slow rate of b-oxidation of fatty acids seems to be a unique intrinsic feature of the brain tissue, particularly of the mitochondria of neurons. For comparison, in the heart and kidney tissue…	PMID: 22833869, PMID: 23921897,
		RE3340C	When glucose production is insufficient, the body shifts to a lipid-based economy. However, the brain cannot oxidize fatty acids for energy, so the production of ketones is protective (1, 2). In summary, the slow rate of b-oxidation of fatty acids seems to be a unique intrinsic feature of the brain tissue, particularly of the mitochondria of neurons. For comparison, in the heart and kidney tissue…	PMID: 22833869, PMID: 23921897,
		RE3338M	When glucose production is insufficient, the body shifts to a lipid-based economy. However, the brain cannot oxidize fatty acids for energy, so the production of ketones is protective (1, 2). In summary, the slow rate of b-oxidation of fatty acids seems to be a unique intrinsic feature of the brain tissue, particularly of the mitochondria of neurons. For comparison, in the heart and kidney tissue…	PMID: 22833869, PMID: 23921897,
		RE3340M	When glucose production is insufficient, the body shifts to a lipid-based economy. However, the brain cannot oxidize fatty acids for energy, so the production of ketones is protective (1, 2). In summary, the slow rate of b-oxidation of fatty acids seems to be a unique intrinsic feature of the brain tissue, particularly of the mitochondria of neurons. For comparison, in the heart and kidney tissue…	PMID: 22833869, PMID: 23921897,
		RE3338X	When glucose production is insufficient, the body shifts to a lipid-based economy. However, the brain cannot oxidize fatty acids for energy, so the production of ketones is protective (1, 2). In summary, the slow rate of b-oxidation of fatty acids seems to be a unique intrinsic feature of the brain tissue, particularly of the mitochondria of neurons. For comparison, in the heart and kidney tissue…	PMID: 22833869, PMID: 23921897,
		RE3340X	When glucose production is insufficient, the body shifts to a lipid-based economy. However, the brain cannot oxidize fatty acids for energy, so the production of ketones is protective (1, 2). In summary, the slow rate of b-oxidation of fatty acids seems to be a unique intrinsic feature of the brain tissue, particularly of the mitochondria of neurons. For comparison, in the heart and kidney tissue…	PMID: 22833869, PMID: 23921897,
		FAOXC205C185m	When glucose production is insufficient, the body shifts to a lipid-based economy. However, the brain cannot oxidize fatty acids for energy, so the production of ketones is protective (1, 2). In summary, the slow rate of b-oxidation of fatty acids seems to be a unique intrinsic feature of the brain tissue, particularly of the mitochondria of neurons. For comparison, in the heart and kidney tissue…	PMID: 22833869, PMID: 23921897,
		FAOXC204C184m	When glucose production is insufficient, the body shifts to a lipid-based economy. However, the brain cannot oxidize fatty acids for energy, so the production of ketones is protective (1, 2). In summary, the slow rate of b-oxidation of fatty acids seems to be a unique intrinsic feature of the brain tissue, particularly of the mitochondria of neurons. For comparison, in the heart and kidney tissue…	PMID: 22833869, PMID: 23921897,
		FAOXC205C184x	When glucose production is insufficient, the body shifts to a lipid-based economy. However, the brain cannot oxidize fatty acids for energy, so the production of ketones is protective (1, 2). In summary, the slow rate of b-oxidation of fatty acids seems to be a unique intrinsic feature of the brain tissue, particularly of the mitochondria of neurons. For comparison, in the heart and kidney tissue…	PMID: 22833869, PMID: 23921897,
		FAOXC143C123m	When glucose production is insufficient, the body shifts to a lipid-based economy. However, the brain cannot oxidize fatty acids for energy, so the production of ketones is protective (1, 2). In summary, the slow rate of b-oxidation of fatty acids seems to be a unique intrinsic feature of the brain tissue, particularly of the mitochondria of neurons. For comparison, in the heart and kidney tissue…	PMID: 22833869, PMID: 23921897,
		FAOXC143C123x	When glucose production is insufficient, the body shifts to a lipid-based economy. However, the brain cannot oxidize fatty acids for energy, so the production of ketones is protective (1, 2). In summary, the slow rate of b-oxidation of fatty acids seems to be a unique intrinsic feature of the brain tissue, particularly of the mitochondria of neurons. For comparison, in the heart and kidney tissue…	PMID: 22833869, PMID: 23921897,
		RE3390M	When glucose production is insufficient, the body shifts to a lipid-based economy. However, the brain cannot oxidize fatty acids for energy, so the production of ketones is protective (1, 2). In summary, the slow rate of b-oxidation of fatty acids seems to be a unique intrinsic feature of the brain tissue, particularly of the mitochondria of neurons. For comparison, in the heart and kidney tissue…	PMID: 22833869, PMID: 23921897,
		RE3401M	When glucose production is insufficient, the body shifts to a lipid-based economy. However, the brain cannot oxidize fatty acids for energy, so the production of ketones is protective (1, 2). In summary, the slow rate of b-oxidation of fatty acids seems to be a unique intrinsic feature of the brain tissue, particularly of the mitochondria of neurons. For comparison, in the heart and kidney tissue…	PMID: 22833869, PMID: 23921897,
		FAOXC142C122m	When glucose production is insufficient, the body shifts to a lipid-based economy. However, the brain cannot oxidize fatty acids for energy, so the production of ketones is protective (1, 2). In summary, the slow rate of b-oxidation of fatty acids seems to be a unique intrinsic feature of the brain tissue, particularly of the mitochondria of neurons. For comparison, in the heart and kidney tissue…	PMID: 22833869, PMID: 23921897,
		FAOXC142C122x	When glucose production is insufficient, the body shifts to a lipid-based economy. However, the brain cannot oxidize fatty acids for energy, so the production of ketones is protective (1, 2). In summary, the slow rate of b-oxidation of fatty acids seems to be a unique intrinsic feature of the brain tissue, particularly of the mitochondria of neurons. For comparison, in the heart and kidney tissue…	PMID: 22833869, PMID: 23921897,
		FAOXC227C226m	When glucose production is insufficient, the body shifts to a lipid-based economy. However, the brain cannot oxidize fatty acids for energy, so the production of ketones is protective (1, 2). In summary, the slow rate of b-oxidation of fatty acids seems to be a unique intrinsic feature of the brain tissue, particularly of the mitochondria of neurons. For comparison, in the heart and kidney tissue…	PMID: 22833869, PMID: 23921897,
		FAOXC226C225m	When glucose production is insufficient, the body shifts to a lipid-based economy. However, the brain cannot oxidize fatty acids for energy, so the production of ketones is protective (1, 2). In summary, the slow rate of b-oxidation of fatty acids seems to be a unique intrinsic feature of the brain tissue, particularly of the mitochondria of neurons. For comparison, in the heart and kidney tissue…	PMID: 22833869, PMID: 23921897,
		FAOXC226C225x	When glucose production is insufficient, the body shifts to a lipid-based economy. However, the brain cannot oxidize fatty acids for energy, so the production of ketones is protective (1, 2). In summary, the slow rate of b-oxidation of fatty acids seems to be a unique intrinsic feature of the brain tissue, particularly of the mitochondria of neurons. For comparison, in the heart and kidney tissue…	PMID: 22833869, PMID: 23921897,
		FAOXC165C164m	When glucose production is insufficient, the body shifts to a lipid-based economy. However, the brain cannot oxidize fatty acids for energy, so the production of ketones is protective (1, 2). In summary, the slow rate of b-oxidation of fatty acids seems to be a unique intrinsic feature of the brain tissue, particularly of the mitochondria of neurons. For comparison, in the heart and kidney tissue…	PMID: 22833869, PMID: 23921897,
		FAOXC165C164x	When glucose production is insufficient, the body shifts to a lipid-based economy. However, the brain cannot oxidize fatty acids for energy, so the production of ketones is protective (1, 2). In summary, the slow rate of b-oxidation of fatty acids seems to be a unique intrinsic feature of the brain tissue, particularly of the mitochondria of neurons. For comparison, in the heart and kidney tissue…	PMID: 22833869, PMID: 23921897,
		FAOXC164GC163m	When glucose production is insufficient, the body shifts to a lipid-based economy. However, the brain cannot oxidize fatty acids for energy, so the production of ketones is protective (1, 2). In summary, the slow rate of b-oxidation of fatty acids seems to be a unique intrinsic feature of the brain tissue, particularly of the mitochondria of neurons. For comparison, in the heart and kidney tissue…	PMID: 22833869, PMID: 23921897,
		FAOXC164C163x	When glucose production is insufficient, the body shifts to a lipid-based economy. However, the brain cannot oxidize fatty acids for energy, so the production of ketones is protective (1, 2). In summary, the slow rate of b-oxidation of fatty acids seems to be a unique intrinsic feature of the brain tissue, particularly of the mitochondria of neurons. For comparison, in the heart and kidney tissue…	PMID: 22833869, PMID: 23921897,
		RE2993X	When glucose production is insufficient, the body shifts to a lipid-based economy. However, the brain cannot oxidize fatty acids for energy, so the production of ketones is protective (1, 2). In summary, the slow rate of b-oxidation of fatty acids seems to be a unique intrinsic feature of the brain tissue, particularly of the mitochondria of neurons. For comparison, in the heart and kidney tissue…	PMID: 22833869, PMID: 23921897,
		RE3386M	When glucose production is insufficient, the body shifts to a lipid-based economy. However, the brain cannot oxidize fatty acids for energy, so the production of ketones is protective (1, 2). In summary, the slow rate of b-oxidation of fatty acids seems to be a unique intrinsic feature of the brain tissue, particularly of the mitochondria of neurons. For comparison, in the heart and kidney tissue…	PMID: 22833869, PMID: 23921897,
		RE3398M	When glucose production is insufficient, the body shifts to a lipid-based economy. However, the brain cannot oxidize fatty acids for energy, so the production of ketones is protective (1, 2). In summary, the slow rate of b-oxidation of fatty acids seems to be a unique intrinsic feature of the brain tissue, particularly of the mitochondria of neurons. For comparison, in the heart and kidney tissue…	PMID: 22833869, PMID: 23921897,
		FAOXC121C101m	When glucose production is insufficient, the body shifts to a lipid-based economy. However, the brain cannot oxidize fatty acids for energy, so the production of ketones is protective (1, 2). In summary, the slow rate of b-oxidation of fatty acids seems to be a unique intrinsic feature of the brain tissue, particularly of the mitochondria of neurons. For comparison, in the heart and kidney tissue…	PMID: 22833869, PMID: 23921897,
		FAOXTC102C101m	When glucose production is insufficient, the body shifts to a lipid-based economy. However, the brain cannot oxidize fatty acids for energy, so the production of ketones is protective (1, 2). In summary, the slow rate of b-oxidation of fatty acids seems to be a unique intrinsic feature of the brain tissue, particularly of the mitochondria of neurons. For comparison, in the heart and kidney tissue…	PMID: 22833869, PMID: 23921897,
		FAOXC81C61m	When glucose production is insufficient, the body shifts to a lipid-based economy. However, the brain cannot oxidize fatty acids for energy, so the production of ketones is protective (1, 2). In summary, the slow rate of b-oxidation of fatty acids seems to be a unique intrinsic feature of the brain tissue, particularly of the mitochondria of neurons. For comparison, in the heart and kidney tissue…	PMID: 22833869, PMID: 23921897,
		FAOXC81C61x	When glucose production is insufficient, the body shifts to a lipid-based economy. However, the brain cannot oxidize fatty acids for energy, so the production of ketones is protective (1, 2). In summary, the slow rate of b-oxidation of fatty acids seems to be a unique intrinsic feature of the brain tissue, particularly of the mitochondria of neurons. For comparison, in the heart and kidney tissue…	PMID: 22833869, PMID: 23921897,
		FAOXC141C141OHm	When glucose production is insufficient, the body shifts to a lipid-based economy. However, the brain cannot oxidize fatty acids for energy, so the production of ketones is protective (1, 2). In summary, the slow rate of b-oxidation of fatty acids seems to be a unique intrinsic feature of the brain tissue, particularly of the mitochondria of neurons. For comparison, in the heart and kidney tissue…	PMID: 22833869, PMID: 23921897,
		FAOXC142C142OHm	When glucose production is insufficient, the body shifts to a lipid-based economy. However, the brain cannot oxidize fatty acids for energy, so the production of ketones is protective (1, 2). In summary, the slow rate of b-oxidation of fatty acids seems to be a unique intrinsic feature of the brain tissue, particularly of the mitochondria of neurons. For comparison, in the heart and kidney tissue…	PMID: 22833869, PMID: 23921897,
		FAOXC162C162OHm	When glucose production is insufficient, the body shifts to a lipid-based economy. However, the brain cannot oxidize fatty acids for energy, so the production of ketones is protective (1, 2). In summary, the slow rate of b-oxidation of fatty acids seems to be a unique intrinsic feature of the brain tissue, particularly of the mitochondria of neurons. For comparison, in the heart and kidney tissue…	PMID: 22833869, PMID: 23921897,
		RE3092X	When glucose production is insufficient, the body shifts to a lipid-based economy. However, the brain cannot oxidize fatty acids for energy, so the production of ketones is protective (1, 2). In summary, the slow rate of b-oxidation of fatty acids seems to be a unique intrinsic feature of the brain tissue, particularly of the mitochondria of neurons. For comparison, in the heart and kidney tissue…	PMID: 22833869, PMID: 23921897,
		RE2990X	When glucose production is insufficient, the body shifts to a lipid-based economy. However, the brain cannot oxidize fatty acids for energy, so the production of ketones is protective (1, 2). In summary, the slow rate of b-oxidation of fatty acids seems to be a unique intrinsic feature of the brain tissue, particularly of the mitochondria of neurons. For comparison, in the heart and kidney tissue…	PMID: 22833869, PMID: 23921897,
		FAOXC12C12OHm	When glucose production is insufficient, the body shifts to a lipid-based economy. However, the brain cannot oxidize fatty acids for energy, so the production of ketones is protective (1, 2). In summary, the slow rate of b-oxidation of fatty acids seems to be a unique intrinsic feature of the brain tissue, particularly of the mitochondria of neurons. For comparison, in the heart and kidney tissue…	PMID: 22833869, PMID: 23921897,
		r0661	When glucose production is insufficient, the body shifts to a lipid-based economy. However, the brain cannot oxidize fatty acids for energy, so the production of ketones is protective (1, 2). In summary, the slow rate of b-oxidation of fatty acids seems to be a unique intrinsic feature of the brain tissue, particularly of the mitochondria of neurons. For comparison, in the heart and kidney tissue…	PMID: 22833869, PMID: 23921897,
		RE1520M	When glucose production is insufficient, the body shifts to a lipid-based economy. However, the brain cannot oxidize fatty acids for energy, so the production of ketones is protective (1, 2). In summary, the slow rate of b-oxidation of fatty acids seems to be a unique intrinsic feature of the brain tissue, particularly of the mitochondria of neurons. For comparison, in the heart and kidney tissue…	PMID: 22833869, PMID: 23921897,
		RE1520X	When glucose production is insufficient, the body shifts to a lipid-based economy. However, the brain cannot oxidize fatty acids for energy, so the production of ketones is protective (1, 2). In summary, the slow rate of b-oxidation of fatty acids seems to be a unique intrinsic feature of the brain tissue, particularly of the mitochondria of neurons. For comparison, in the heart and kidney tissue…	PMID: 22833869, PMID: 23921897,
		FAOXC16C16OHm	When glucose production is insufficient, the body shifts to a lipid-based economy. However, the brain cannot oxidize fatty acids for energy, so the production of ketones is protective (1, 2). In summary, the slow rate of b-oxidation of fatty acids seems to be a unique intrinsic feature of the brain tissue, particularly of the mitochondria of neurons. For comparison, in the heart and kidney tissue…	PMID: 22833869, PMID: 23921897,
		r0716	When glucose production is insufficient, the body shifts to a lipid-based economy. However, the brain cannot oxidize fatty acids for energy, so the production of ketones is protective (1, 2). In summary, the slow rate of b-oxidation of fatty acids seems to be a unique intrinsic feature of the brain tissue, particularly of the mitochondria of neurons. For comparison, in the heart and kidney tissue…	PMID: 22833869, PMID: 23921897,
		r0717	When glucose production is insufficient, the body shifts to a lipid-based economy. However, the brain cannot oxidize fatty acids for energy, so the production of ketones is protective (1, 2). In summary, the slow rate of b-oxidation of fatty acids seems to be a unique intrinsic feature of the brain tissue, particularly of the mitochondria of neurons. For comparison, in the heart and kidney tissue…	PMID: 22833869, PMID: 23921897,
		FAOXC161C161OHm	When glucose production is insufficient, the body shifts to a lipid-based economy. However, the brain cannot oxidize fatty acids for energy, so the production of ketones is protective (1, 2). In summary, the slow rate of b-oxidation of fatty acids seems to be a unique intrinsic feature of the brain tissue, particularly of the mitochondria of neurons. For comparison, in the heart and kidney tissue…	PMID: 22833869, PMID: 23921897,
		FAOXC5C5OHm	When glucose production is insufficient, the body shifts to a lipid-based economy. However, the brain cannot oxidize fatty acids for energy, so the production of ketones is protective (1, 2). In summary, the slow rate of b-oxidation of fatty acids seems to be a unique intrinsic feature of the brain tissue, particularly of the mitochondria of neurons. For comparison, in the heart and kidney tissue…	PMID: 22833869, PMID: 23921897,
		RE1523M	When glucose production is insufficient, the body shifts to a lipid-based economy. However, the brain cannot oxidize fatty acids for energy, so the production of ketones is protective (1, 2). In summary, the slow rate of b-oxidation of fatty acids seems to be a unique intrinsic feature of the brain tissue, particularly of the mitochondria of neurons. For comparison, in the heart and kidney tissue…	PMID: 22833869, PMID: 23921897,
		RE1523X	When glucose production is insufficient, the body shifts to a lipid-based economy. However, the brain cannot oxidize fatty acids for energy, so the production of ketones is protective (1, 2). In summary, the slow rate of b-oxidation of fatty acids seems to be a unique intrinsic feature of the brain tissue, particularly of the mitochondria of neurons. For comparison, in the heart and kidney tissue…	PMID: 22833869, PMID: 23921897,
		FAOXC182C182OHm	When glucose production is insufficient, the body shifts to a lipid-based economy. However, the brain cannot oxidize fatty acids for energy, so the production of ketones is protective (1, 2). In summary, the slow rate of b-oxidation of fatty acids seems to be a unique intrinsic feature of the brain tissue, particularly of the mitochondria of neurons. For comparison, in the heart and kidney tissue…	PMID: 22833869, PMID: 23921897,
		FAOXC18C18OHm	When glucose production is insufficient, the body shifts to a lipid-based economy. However, the brain cannot oxidize fatty acids for energy, so the production of ketones is protective (1, 2). In summary, the slow rate of b-oxidation of fatty acids seems to be a unique intrinsic feature of the brain tissue, particularly of the mitochondria of neurons. For comparison, in the heart and kidney tissue…	PMID: 22833869, PMID: 23921897,
		FAOXC181C181OHm	When glucose production is insufficient, the body shifts to a lipid-based economy. However, the brain cannot oxidize fatty acids for energy, so the production of ketones is protective (1, 2). In summary, the slow rate of b-oxidation of fatty acids seems to be a unique intrinsic feature of the brain tissue, particularly of the mitochondria of neurons. For comparison, in the heart and kidney tissue…	PMID: 22833869, PMID: 23921897,
		r1474	When glucose production is insufficient, the body shifts to a lipid-based economy. However, the brain cannot oxidize fatty acids for energy, so the production of ketones is protective (1, 2). In summary, the slow rate of b-oxidation of fatty acids seems to be a unique intrinsic feature of the brain tissue, particularly of the mitochondria of neurons. For comparison, in the heart and kidney tissue…	PMID: 22833869, PMID: 23921897,
		RE2919M	When glucose production is insufficient, the body shifts to a lipid-based economy. However, the brain cannot oxidize fatty acids for energy, so the production of ketones is protective (1, 2). In summary, the slow rate of b-oxidation of fatty acids seems to be a unique intrinsic feature of the brain tissue, particularly of the mitochondria of neurons. For comparison, in the heart and kidney tissue…	PMID: 22833869, PMID: 23921897,
		RE2919X	When glucose production is insufficient, the body shifts to a lipid-based economy. However, the brain cannot oxidize fatty acids for energy, so the production of ketones is protective (1, 2). In summary, the slow rate of b-oxidation of fatty acids seems to be a unique intrinsic feature of the brain tissue, particularly of the mitochondria of neurons. For comparison, in the heart and kidney tissue…	PMID: 22833869, PMID: 23921897,
		r0720	When glucose production is insufficient, the body shifts to a lipid-based economy. However, the brain cannot oxidize fatty acids for energy, so the production of ketones is protective (1, 2). In summary, the slow rate of b-oxidation of fatty acids seems to be a unique intrinsic feature of the brain tissue, particularly of the mitochondria of neurons. For comparison, in the heart and kidney tissue…	PMID: 22833869, PMID: 23921897,
		FAOXC14C14OHm	When glucose production is insufficient, the body shifts to a lipid-based economy. However, the brain cannot oxidize fatty acids for energy, so the production of ketones is protective (1, 2). In summary, the slow rate of b-oxidation of fatty acids seems to be a unique intrinsic feature of the brain tissue, particularly of the mitochondria of neurons. For comparison, in the heart and kidney tissue…	PMID: 22833869, PMID: 23921897,
		r0721	When glucose production is insufficient, the body shifts to a lipid-based economy. However, the brain cannot oxidize fatty acids for energy, so the production of ketones is protective (1, 2). In summary, the slow rate of b-oxidation of fatty acids seems to be a unique intrinsic feature of the brain tissue, particularly of the mitochondria of neurons. For comparison, in the heart and kidney tissue…	PMID: 22833869, PMID: 23921897,
		RE3178M	When glucose production is insufficient, the body shifts to a lipid-based economy. However, the brain cannot oxidize fatty acids for energy, so the production of ketones is protective (1, 2). In summary, the slow rate of b-oxidation of fatty acids seems to be a unique intrinsic feature of the brain tissue, particularly of the mitochondria of neurons. For comparison, in the heart and kidney tissue…	PMID: 22833869, PMID: 23921897,
		RE3336M	When glucose production is insufficient, the body shifts to a lipid-based economy. However, the brain cannot oxidize fatty acids for energy, so the production of ketones is protective (1, 2). In summary, the slow rate of b-oxidation of fatty acids seems to be a unique intrinsic feature of the brain tissue, particularly of the mitochondria of neurons. For comparison, in the heart and kidney tissue…	PMID: 22833869, PMID: 23921897,
		RE3342M	When glucose production is insufficient, the body shifts to a lipid-based economy. However, the brain cannot oxidize fatty acids for energy, so the production of ketones is protective (1, 2). In summary, the slow rate of b-oxidation of fatty acids seems to be a unique intrinsic feature of the brain tissue, particularly of the mitochondria of neurons. For comparison, in the heart and kidney tissue…	PMID: 22833869, PMID: 23921897,
		RE3336X	When glucose production is insufficient, the body shifts to a lipid-based economy. However, the brain cannot oxidize fatty acids for energy, so the production of ketones is protective (1, 2). In summary, the slow rate of b-oxidation of fatty acids seems to be a unique intrinsic feature of the brain tissue, particularly of the mitochondria of neurons. For comparison, in the heart and kidney tissue…	PMID: 22833869, PMID: 23921897,
		RE3342X	When glucose production is insufficient, the body shifts to a lipid-based economy. However, the brain cannot oxidize fatty acids for energy, so the production of ketones is protective (1, 2). In summary, the slow rate of b-oxidation of fatty acids seems to be a unique intrinsic feature of the brain tissue, particularly of the mitochondria of neurons. For comparison, in the heart and kidney tissue…	PMID: 22833869, PMID: 23921897,
		RE3093X	When glucose production is insufficient, the body shifts to a lipid-based economy. However, the brain cannot oxidize fatty acids for energy, so the production of ketones is protective (1, 2). In summary, the slow rate of b-oxidation of fatty acids seems to be a unique intrinsic feature of the brain tissue, particularly of the mitochondria of neurons. For comparison, in the heart and kidney tissue…	PMID: 22833869, PMID: 23921897,
		RE3177M	When glucose production is insufficient, the body shifts to a lipid-based economy. However, the brain cannot oxidize fatty acids for energy, so the production of ketones is protective (1, 2). In summary, the slow rate of b-oxidation of fatty acids seems to be a unique intrinsic feature of the brain tissue, particularly of the mitochondria of neurons. For comparison, in the heart and kidney tissue…	PMID: 22833869, PMID: 23921897,
		RE3088X	When glucose production is insufficient, the body shifts to a lipid-based economy. However, the brain cannot oxidize fatty acids for energy, so the production of ketones is protective (1, 2). In summary, the slow rate of b-oxidation of fatty acids seems to be a unique intrinsic feature of the brain tissue, particularly of the mitochondria of neurons. For comparison, in the heart and kidney tissue…	PMID: 22833869, PMID: 23921897,
		RE3179M	When glucose production is insufficient, the body shifts to a lipid-based economy. However, the brain cannot oxidize fatty acids for energy, so the production of ketones is protective (1, 2). In summary, the slow rate of b-oxidation of fatty acids seems to be a unique intrinsic feature of the brain tissue, particularly of the mitochondria of neurons. For comparison, in the heart and kidney tissue…	PMID: 22833869, PMID: 23921897,
		RE3448C	When glucose production is insufficient, the body shifts to a lipid-based economy. However, the brain cannot oxidize fatty acids for energy, so the production of ketones is protective (1, 2). In summary, the slow rate of b-oxidation of fatty acids seems to be a unique intrinsic feature of the brain tissue, particularly of the mitochondria of neurons. For comparison, in the heart and kidney tissue…	PMID: 22833869, PMID: 23921897,
		RE3448M	When glucose production is insufficient, the body shifts to a lipid-based economy. However, the brain cannot oxidize fatty acids for energy, so the production of ketones is protective (1, 2). In summary, the slow rate of b-oxidation of fatty acids seems to be a unique intrinsic feature of the brain tissue, particularly of the mitochondria of neurons. For comparison, in the heart and kidney tissue…	PMID: 22833869, PMID: 23921897,
		RE3448X	When glucose production is insufficient, the body shifts to a lipid-based economy. However, the brain cannot oxidize fatty acids for energy, so the production of ketones is protective (1, 2). In summary, the slow rate of b-oxidation of fatty acids seems to be a unique intrinsic feature of the brain tissue, particularly of the mitochondria of neurons. For comparison, in the heart and kidney tissue…	PMID: 22833869, PMID: 23921897,
		RE2991X	When glucose production is insufficient, the body shifts to a lipid-based economy. However, the brain cannot oxidize fatty acids for energy, so the production of ketones is protective (1, 2). In summary, the slow rate of b-oxidation of fatty acids seems to be a unique intrinsic feature of the brain tissue, particularly of the mitochondria of neurons. For comparison, in the heart and kidney tissue…	PMID: 22833869, PMID: 23921897,
		RE3393M	When glucose production is insufficient, the body shifts to a lipid-based economy. However, the brain cannot oxidize fatty acids for energy, so the production of ketones is protective (1, 2). In summary, the slow rate of b-oxidation of fatty acids seems to be a unique intrinsic feature of the brain tissue, particularly of the mitochondria of neurons. For comparison, in the heart and kidney tissue…	PMID: 22833869, PMID: 23921897,
		RE3402M	When glucose production is insufficient, the body shifts to a lipid-based economy. However, the brain cannot oxidize fatty acids for energy, so the production of ketones is protective (1, 2). In summary, the slow rate of b-oxidation of fatty acids seems to be a unique intrinsic feature of the brain tissue, particularly of the mitochondria of neurons. For comparison, in the heart and kidney tissue…	PMID: 22833869, PMID: 23921897,
		RE3387M	When glucose production is insufficient, the body shifts to a lipid-based economy. However, the brain cannot oxidize fatty acids for energy, so the production of ketones is protective (1, 2). In summary, the slow rate of b-oxidation of fatty acids seems to be a unique intrinsic feature of the brain tissue, particularly of the mitochondria of neurons. For comparison, in the heart and kidney tissue…	PMID: 22833869, PMID: 23921897,
		RE3399M	When glucose production is insufficient, the body shifts to a lipid-based economy. However, the brain cannot oxidize fatty acids for energy, so the production of ketones is protective (1, 2). In summary, the slow rate of b-oxidation of fatty acids seems to be a unique intrinsic feature of the brain tissue, particularly of the mitochondria of neurons. For comparison, in the heart and kidney tissue…	PMID: 22833869, PMID: 23921897,
		RE3141X	When glucose production is insufficient, the body shifts to a lipid-based economy. However, the brain cannot oxidize fatty acids for energy, so the production of ketones is protective (1, 2). In summary, the slow rate of b-oxidation of fatty acids seems to be a unique intrinsic feature of the brain tissue, particularly of the mitochondria of neurons. For comparison, in the heart and kidney tissue…	PMID: 22833869, PMID: 23921897,
		RE3156X	When glucose production is insufficient, the body shifts to a lipid-based economy. However, the brain cannot oxidize fatty acids for energy, so the production of ketones is protective (1, 2). In summary, the slow rate of b-oxidation of fatty acids seems to be a unique intrinsic feature of the brain tissue, particularly of the mitochondria of neurons. For comparison, in the heart and kidney tissue…	PMID: 22833869, PMID: 23921897,
		RE1526C	When glucose production is insufficient, the body shifts to a lipid-based economy. However, the brain cannot oxidize fatty acids for energy, so the production of ketones is protective (1, 2). In summary, the slow rate of b-oxidation of fatty acids seems to be a unique intrinsic feature of the brain tissue, particularly of the mitochondria of neurons. For comparison, in the heart and kidney tissue…	PMID: 22833869, PMID: 23921897,
		RE1526M	When glucose production is insufficient, the body shifts to a lipid-based economy. However, the brain cannot oxidize fatty acids for energy, so the production of ketones is protective (1, 2). In summary, the slow rate of b-oxidation of fatty acids seems to be a unique intrinsic feature of the brain tissue, particularly of the mitochondria of neurons. For comparison, in the heart and kidney tissue…	PMID: 22833869, PMID: 23921897,
		RE1526X	When glucose production is insufficient, the body shifts to a lipid-based economy. However, the brain cannot oxidize fatty acids for energy, so the production of ketones is protective (1, 2). In summary, the slow rate of b-oxidation of fatty acids seems to be a unique intrinsic feature of the brain tissue, particularly of the mitochondria of neurons. For comparison, in the heart and kidney tissue…	PMID: 22833869, PMID: 23921897,
		RE1525C	When glucose production is insufficient, the body shifts to a lipid-based economy. However, the brain cannot oxidize fatty acids for energy, so the production of ketones is protective (1, 2). In summary, the slow rate of b-oxidation of fatty acids seems to be a unique intrinsic feature of the brain tissue, particularly of the mitochondria of neurons. For comparison, in the heart and kidney tissue…	PMID: 22833869, PMID: 23921897,
		RE1525M	When glucose production is insufficient, the body shifts to a lipid-based economy. However, the brain cannot oxidize fatty acids for energy, so the production of ketones is protective (1, 2). In summary, the slow rate of b-oxidation of fatty acids seems to be a unique intrinsic feature of the brain tissue, particularly of the mitochondria of neurons. For comparison, in the heart and kidney tissue…	PMID: 22833869, PMID: 23921897,
		RE1525X	When glucose production is insufficient, the body shifts to a lipid-based economy. However, the brain cannot oxidize fatty acids for energy, so the production of ketones is protective (1, 2). In summary, the slow rate of b-oxidation of fatty acids seems to be a unique intrinsic feature of the brain tissue, particularly of the mitochondria of neurons. For comparison, in the heart and kidney tissue…	PMID: 22833869, PMID: 23921897,
		RE3005M	When glucose production is insufficient, the body shifts to a lipid-based economy. However, the brain cannot oxidize fatty acids for energy, so the production of ketones is protective (1, 2). In summary, the slow rate of b-oxidation of fatty acids seems to be a unique intrinsic feature of the brain tissue, particularly of the mitochondria of neurons. For comparison, in the heart and kidney tissue…	PMID: 22833869, PMID: 23921897,
		r0726	When glucose production is insufficient, the body shifts to a lipid-based economy. However, the brain cannot oxidize fatty acids for energy, so the production of ketones is protective (1, 2). In summary, the slow rate of b-oxidation of fatty acids seems to be a unique intrinsic feature of the brain tissue, particularly of the mitochondria of neurons. For comparison, in the heart and kidney tissue…	PMID: 22833869, PMID: 23921897,
		r0727	When glucose production is insufficient, the body shifts to a lipid-based economy. However, the brain cannot oxidize fatty acids for energy, so the production of ketones is protective (1, 2). In summary, the slow rate of b-oxidation of fatty acids seems to be a unique intrinsic feature of the brain tissue, particularly of the mitochondria of neurons. For comparison, in the heart and kidney tissue…	PMID: 22833869, PMID: 23921897,
		RE2987X	When glucose production is insufficient, the body shifts to a lipid-based economy. However, the brain cannot oxidize fatty acids for energy, so the production of ketones is protective (1, 2). In summary, the slow rate of b-oxidation of fatty acids seems to be a unique intrinsic feature of the brain tissue, particularly of the mitochondria of neurons. For comparison, in the heart and kidney tissue…	PMID: 22833869, PMID: 23921897,
		r0722	When glucose production is insufficient, the body shifts to a lipid-based economy. However, the brain cannot oxidize fatty acids for energy, so the production of ketones is protective (1, 2). In summary, the slow rate of b-oxidation of fatty acids seems to be a unique intrinsic feature of the brain tissue, particularly of the mitochondria of neurons. For comparison, in the heart and kidney tissue…	PMID: 22833869, PMID: 23921897,
		r0723	When glucose production is insufficient, the body shifts to a lipid-based economy. However, the brain cannot oxidize fatty acids for energy, so the production of ketones is protective (1, 2). In summary, the slow rate of b-oxidation of fatty acids seems to be a unique intrinsic feature of the brain tissue, particularly of the mitochondria of neurons. For comparison, in the heart and kidney tissue…	PMID: 22833869, PMID: 23921897,
		r0733	When glucose production is insufficient, the body shifts to a lipid-based economy. However, the brain cannot oxidize fatty acids for energy, so the production of ketones is protective (1, 2). In summary, the slow rate of b-oxidation of fatty acids seems to be a unique intrinsic feature of the brain tissue, particularly of the mitochondria of neurons. For comparison, in the heart and kidney tissue…	PMID: 22833869, PMID: 23921897,
		RE1527C	When glucose production is insufficient, the body shifts to a lipid-based economy. However, the brain cannot oxidize fatty acids for energy, so the production of ketones is protective (1, 2). In summary, the slow rate of b-oxidation of fatty acids seems to be a unique intrinsic feature of the brain tissue, particularly of the mitochondria of neurons. For comparison, in the heart and kidney tissue…	PMID: 22833869, PMID: 23921897,
		RE1527M	When glucose production is insufficient, the body shifts to a lipid-based economy. However, the brain cannot oxidize fatty acids for energy, so the production of ketones is protective (1, 2). In summary, the slow rate of b-oxidation of fatty acids seems to be a unique intrinsic feature of the brain tissue, particularly of the mitochondria of neurons. For comparison, in the heart and kidney tissue…	PMID: 22833869, PMID: 23921897,
		RE1527X	When glucose production is insufficient, the body shifts to a lipid-based economy. However, the brain cannot oxidize fatty acids for energy, so the production of ketones is protective (1, 2). In summary, the slow rate of b-oxidation of fatty acids seems to be a unique intrinsic feature of the brain tissue, particularly of the mitochondria of neurons. For comparison, in the heart and kidney tissue…	PMID: 22833869, PMID: 23921897,
		RE2910C	When glucose production is insufficient, the body shifts to a lipid-based economy. However, the brain cannot oxidize fatty acids for energy, so the production of ketones is protective (1, 2). In summary, the slow rate of b-oxidation of fatty acids seems to be a unique intrinsic feature of the brain tissue, particularly of the mitochondria of neurons. For comparison, in the heart and kidney tissue…	PMID: 22833869, PMID: 23921897,
		RE2910M	When glucose production is insufficient, the body shifts to a lipid-based economy. However, the brain cannot oxidize fatty acids for energy, so the production of ketones is protective (1, 2). In summary, the slow rate of b-oxidation of fatty acids seems to be a unique intrinsic feature of the brain tissue, particularly of the mitochondria of neurons. For comparison, in the heart and kidney tissue…	PMID: 22833869, PMID: 23921897,
		RE2910X	When glucose production is insufficient, the body shifts to a lipid-based economy. However, the brain cannot oxidize fatty acids for energy, so the production of ketones is protective (1, 2). In summary, the slow rate of b-oxidation of fatty acids seems to be a unique intrinsic feature of the brain tissue, particularly of the mitochondria of neurons. For comparison, in the heart and kidney tissue…	PMID: 22833869, PMID: 23921897,
		RE0512C	When glucose production is insufficient, the body shifts to a lipid-based economy. However, the brain cannot oxidize fatty acids for energy, so the production of ketones is protective (1, 2). In summary, the slow rate of b-oxidation of fatty acids seems to be a unique intrinsic feature of the brain tissue, particularly of the mitochondria of neurons. For comparison, in the heart and kidney tissue…	PMID: 22833869, PMID: 23921897,
		RE0512M	When glucose production is insufficient, the body shifts to a lipid-based economy. However, the brain cannot oxidize fatty acids for energy, so the production of ketones is protective (1, 2). In summary, the slow rate of b-oxidation of fatty acids seems to be a unique intrinsic feature of the brain tissue, particularly of the mitochondria of neurons. For comparison, in the heart and kidney tissue…	PMID: 22833869, PMID: 23921897,
		RE0512X	When glucose production is insufficient, the body shifts to a lipid-based economy. However, the brain cannot oxidize fatty acids for energy, so the production of ketones is protective (1, 2). In summary, the slow rate of b-oxidation of fatty acids seems to be a unique intrinsic feature of the brain tissue, particularly of the mitochondria of neurons. For comparison, in the heart and kidney tissue…	PMID: 22833869, PMID: 23921897,
		RE2909C	When glucose production is insufficient, the body shifts to a lipid-based economy. However, the brain cannot oxidize fatty acids for energy, so the production of ketones is protective (1, 2). In summary, the slow rate of b-oxidation of fatty acids seems to be a unique intrinsic feature of the brain tissue, particularly of the mitochondria of neurons. For comparison, in the heart and kidney tissue…	PMID: 22833869, PMID: 23921897,
		RE2909M	When glucose production is insufficient, the body shifts to a lipid-based economy. However, the brain cannot oxidize fatty acids for energy, so the production of ketones is protective (1, 2). In summary, the slow rate of b-oxidation of fatty acids seems to be a unique intrinsic feature of the brain tissue, particularly of the mitochondria of neurons. For comparison, in the heart and kidney tissue…	PMID: 22833869, PMID: 23921897,
		RE2909X	When glucose production is insufficient, the body shifts to a lipid-based economy. However, the brain cannot oxidize fatty acids for energy, so the production of ketones is protective (1, 2). In summary, the slow rate of b-oxidation of fatty acids seems to be a unique intrinsic feature of the brain tissue, particularly of the mitochondria of neurons. For comparison, in the heart and kidney tissue…	PMID: 22833869, PMID: 23921897,
		r0730	When glucose production is insufficient, the body shifts to a lipid-based economy. However, the brain cannot oxidize fatty acids for energy, so the production of ketones is protective (1, 2). In summary, the slow rate of b-oxidation of fatty acids seems to be a unique intrinsic feature of the brain tissue, particularly of the mitochondria of neurons. For comparison, in the heart and kidney tissue…	PMID: 22833869, PMID: 23921897,
		r1477	When glucose production is insufficient, the body shifts to a lipid-based economy. However, the brain cannot oxidize fatty acids for energy, so the production of ketones is protective (1, 2). In summary, the slow rate of b-oxidation of fatty acids seems to be a unique intrinsic feature of the brain tissue, particularly of the mitochondria of neurons. For comparison, in the heart and kidney tissue…	PMID: 22833869, PMID: 23921897,
		RE2908C	When glucose production is insufficient, the body shifts to a lipid-based economy. However, the brain cannot oxidize fatty acids for energy, so the production of ketones is protective (1, 2). In summary, the slow rate of b-oxidation of fatty acids seems to be a unique intrinsic feature of the brain tissue, particularly of the mitochondria of neurons. For comparison, in the heart and kidney tissue…	PMID: 22833869, PMID: 23921897,
		RE2908M	When glucose production is insufficient, the body shifts to a lipid-based economy. However, the brain cannot oxidize fatty acids for energy, so the production of ketones is protective (1, 2). In summary, the slow rate of b-oxidation of fatty acids seems to be a unique intrinsic feature of the brain tissue, particularly of the mitochondria of neurons. For comparison, in the heart and kidney tissue…	PMID: 22833869, PMID: 23921897,
		RE2908X	When glucose production is insufficient, the body shifts to a lipid-based economy. However, the brain cannot oxidize fatty acids for energy, so the production of ketones is protective (1, 2). In summary, the slow rate of b-oxidation of fatty acids seems to be a unique intrinsic feature of the brain tissue, particularly of the mitochondria of neurons. For comparison, in the heart and kidney tissue…	PMID: 22833869, PMID: 23921897,
		r0714	When glucose production is insufficient, the body shifts to a lipid-based economy. However, the brain cannot oxidize fatty acids for energy, so the production of ketones is protective (1, 2). In summary, the slow rate of b-oxidation of fatty acids seems to be a unique intrinsic feature of the brain tissue, particularly of the mitochondria of neurons. For comparison, in the heart and kidney tissue…	PMID: 22833869, PMID: 23921897,
		r0715	When glucose production is insufficient, the body shifts to a lipid-based economy. However, the brain cannot oxidize fatty acids for energy, so the production of ketones is protective (1, 2). In summary, the slow rate of b-oxidation of fatty acids seems to be a unique intrinsic feature of the brain tissue, particularly of the mitochondria of neurons. For comparison, in the heart and kidney tissue…	PMID: 22833869, PMID: 23921897,
		RE3082X	When glucose production is insufficient, the body shifts to a lipid-based economy. However, the brain cannot oxidize fatty acids for energy, so the production of ketones is protective (1, 2). In summary, the slow rate of b-oxidation of fatty acids seems to be a unique intrinsic feature of the brain tissue, particularly of the mitochondria of neurons. For comparison, in the heart and kidney tissue…	PMID: 22833869, PMID: 23921897,
		r0718	When glucose production is insufficient, the body shifts to a lipid-based economy. However, the brain cannot oxidize fatty acids for energy, so the production of ketones is protective (1, 2). In summary, the slow rate of b-oxidation of fatty acids seems to be a unique intrinsic feature of the brain tissue, particularly of the mitochondria of neurons. For comparison, in the heart and kidney tissue…	PMID: 22833869, PMID: 23921897,
		r0719	When glucose production is insufficient, the body shifts to a lipid-based economy. However, the brain cannot oxidize fatty acids for energy, so the production of ketones is protective (1, 2). In summary, the slow rate of b-oxidation of fatty acids seems to be a unique intrinsic feature of the brain tissue, particularly of the mitochondria of neurons. For comparison, in the heart and kidney tissue…	PMID: 22833869, PMID: 23921897,
		RE3184M	When glucose production is insufficient, the body shifts to a lipid-based economy. However, the brain cannot oxidize fatty acids for energy, so the production of ketones is protective (1, 2). In summary, the slow rate of b-oxidation of fatty acids seems to be a unique intrinsic feature of the brain tissue, particularly of the mitochondria of neurons. For comparison, in the heart and kidney tissue…	PMID: 22833869, PMID: 23921897,
		FAOXC184C164m	When glucose production is insufficient, the body shifts to a lipid-based economy. However, the brain cannot oxidize fatty acids for energy, so the production of ketones is protective (1, 2). In summary, the slow rate of b-oxidation of fatty acids seems to be a unique intrinsic feature of the brain tissue, particularly of the mitochondria of neurons. For comparison, in the heart and kidney tissue…	PMID: 22833869, PMID: 23921897,
		FAOXC185C164m	When glucose production is insufficient, the body shifts to a lipid-based economy. However, the brain cannot oxidize fatty acids for energy, so the production of ketones is protective (1, 2). In summary, the slow rate of b-oxidation of fatty acids seems to be a unique intrinsic feature of the brain tissue, particularly of the mitochondria of neurons. For comparison, in the heart and kidney tissue…	PMID: 22833869, PMID: 23921897,
		FAOXC184C164x	When glucose production is insufficient, the body shifts to a lipid-based economy. However, the brain cannot oxidize fatty acids for energy, so the production of ketones is protective (1, 2). In summary, the slow rate of b-oxidation of fatty acids seems to be a unique intrinsic feature of the brain tissue, particularly of the mitochondria of neurons. For comparison, in the heart and kidney tissue…	PMID: 22833869, PMID: 23921897,
		FAOXC183C163Gm	When glucose production is insufficient, the body shifts to a lipid-based economy. However, the brain cannot oxidize fatty acids for energy, so the production of ketones is protective (1, 2). In summary, the slow rate of b-oxidation of fatty acids seems to be a unique intrinsic feature of the brain tissue, particularly of the mitochondria of neurons. For comparison, in the heart and kidney tissue…	PMID: 22833869, PMID: 23921897,
		FAOXC184C163m	When glucose production is insufficient, the body shifts to a lipid-based economy. However, the brain cannot oxidize fatty acids for energy, so the production of ketones is protective (1, 2). In summary, the slow rate of b-oxidation of fatty acids seems to be a unique intrinsic feature of the brain tissue, particularly of the mitochondria of neurons. For comparison, in the heart and kidney tissue…	PMID: 22833869, PMID: 23921897,
		FAOXC184C163x	When glucose production is insufficient, the body shifts to a lipid-based economy. However, the brain cannot oxidize fatty acids for energy, so the production of ketones is protective (1, 2). In summary, the slow rate of b-oxidation of fatty acids seems to be a unique intrinsic feature of the brain tissue, particularly of the mitochondria of neurons. For comparison, in the heart and kidney tissue…	PMID: 22833869, PMID: 23921897,
		RE2989X	When glucose production is insufficient, the body shifts to a lipid-based economy. However, the brain cannot oxidize fatty acids for energy, so the production of ketones is protective (1, 2). In summary, the slow rate of b-oxidation of fatty acids seems to be a unique intrinsic feature of the brain tissue, particularly of the mitochondria of neurons. For comparison, in the heart and kidney tissue…	PMID: 22833869, PMID: 23921897,
		FAOXC123C102m	When glucose production is insufficient, the body shifts to a lipid-based economy. However, the brain cannot oxidize fatty acids for energy, so the production of ketones is protective (1, 2). In summary, the slow rate of b-oxidation of fatty acids seems to be a unique intrinsic feature of the brain tissue, particularly of the mitochondria of neurons. For comparison, in the heart and kidney tissue…	PMID: 22833869, PMID: 23921897,
		FAOXC123C102x	When glucose production is insufficient, the body shifts to a lipid-based economy. However, the brain cannot oxidize fatty acids for energy, so the production of ketones is protective (1, 2). In summary, the slow rate of b-oxidation of fatty acids seems to be a unique intrinsic feature of the brain tissue, particularly of the mitochondria of neurons. For comparison, in the heart and kidney tissue…	PMID: 22833869, PMID: 23921897,
		PEROXx	When glucose production is insufficient, the body shifts to a lipid-based economy. However, the brain cannot oxidize fatty acids for energy, so the production of ketones is protective (1, 2). In summary, the slow rate of b-oxidation of fatty acids seems to be a unique intrinsic feature of the brain tissue, particularly of the mitochondria of neurons. For comparison, in the heart and kidney tissue…	PMID: 22833869, PMID: 23921897,
		RE3084X	When glucose production is insufficient, the body shifts to a lipid-based economy. However, the brain cannot oxidize fatty acids for energy, so the production of ketones is protective (1, 2). In summary, the slow rate of b-oxidation of fatty acids seems to be a unique intrinsic feature of the brain tissue, particularly of the mitochondria of neurons. For comparison, in the heart and kidney tissue…	PMID: 22833869, PMID: 23921897,
		RE3090X	When glucose production is insufficient, the body shifts to a lipid-based economy. However, the brain cannot oxidize fatty acids for energy, so the production of ketones is protective (1, 2). In summary, the slow rate of b-oxidation of fatty acids seems to be a unique intrinsic feature of the brain tissue, particularly of the mitochondria of neurons. For comparison, in the heart and kidney tissue…	PMID: 22833869, PMID: 23921897,
		FAOXC122C101m	When glucose production is insufficient, the body shifts to a lipid-based economy. However, the brain cannot oxidize fatty acids for energy, so the production of ketones is protective (1, 2). In summary, the slow rate of b-oxidation of fatty acids seems to be a unique intrinsic feature of the brain tissue, particularly of the mitochondria of neurons. For comparison, in the heart and kidney tissue…	PMID: 22833869, PMID: 23921897,
		FOAXC122C101x	When glucose production is insufficient, the body shifts to a lipid-based economy. However, the brain cannot oxidize fatty acids for energy, so the production of ketones is protective (1, 2). In summary, the slow rate of b-oxidation of fatty acids seems to be a unique intrinsic feature of the brain tissue, particularly of the mitochondria of neurons. For comparison, in the heart and kidney tissue…	PMID: 22833869, PMID: 23921897,
		RE3388M	When glucose production is insufficient, the body shifts to a lipid-based economy. However, the brain cannot oxidize fatty acids for energy, so the production of ketones is protective (1, 2). In summary, the slow rate of b-oxidation of fatty acids seems to be a unique intrinsic feature of the brain tissue, particularly of the mitochondria of neurons. For comparison, in the heart and kidney tissue…	PMID: 22833869, PMID: 23921897,
		RE3400M	When glucose production is insufficient, the body shifts to a lipid-based economy. However, the brain cannot oxidize fatty acids for energy, so the production of ketones is protective (1, 2). In summary, the slow rate of b-oxidation of fatty acids seems to be a unique intrinsic feature of the brain tissue, particularly of the mitochondria of neurons. For comparison, in the heart and kidney tissue…	PMID: 22833869, PMID: 23921897,
		RE3190M	When glucose production is insufficient, the body shifts to a lipid-based economy. However, the brain cannot oxidize fatty acids for energy, so the production of ketones is protective (1, 2). In summary, the slow rate of b-oxidation of fatty acids seems to be a unique intrinsic feature of the brain tissue, particularly of the mitochondria of neurons. For comparison, in the heart and kidney tissue…	PMID: 22833869, PMID: 23921897,
		RE3186M	When glucose production is insufficient, the body shifts to a lipid-based economy. However, the brain cannot oxidize fatty acids for energy, so the production of ketones is protective (1, 2). In summary, the slow rate of b-oxidation of fatty acids seems to be a unique intrinsic feature of the brain tissue, particularly of the mitochondria of neurons. For comparison, in the heart and kidney tissue…	PMID: 22833869, PMID: 23921897,
		RE3445M	When glucose production is insufficient, the body shifts to a lipid-based economy. However, the brain cannot oxidize fatty acids for energy, so the production of ketones is protective (1, 2). In summary, the slow rate of b-oxidation of fatty acids seems to be a unique intrinsic feature of the brain tissue, particularly of the mitochondria of neurons. For comparison, in the heart and kidney tissue…	PMID: 22833869, PMID: 23921897,
		RE3445X	When glucose production is insufficient, the body shifts to a lipid-based economy. However, the brain cannot oxidize fatty acids for energy, so the production of ketones is protective (1, 2). In summary, the slow rate of b-oxidation of fatty acids seems to be a unique intrinsic feature of the brain tissue, particularly of the mitochondria of neurons. For comparison, in the heart and kidney tissue…	PMID: 22833869, PMID: 23921897,
		FAOXC226C205m	When glucose production is insufficient, the body shifts to a lipid-based economy. However, the brain cannot oxidize fatty acids for energy, so the production of ketones is protective (1, 2). In summary, the slow rate of b-oxidation of fatty acids seems to be a unique intrinsic feature of the brain tissue, particularly of the mitochondria of neurons. For comparison, in the heart and kidney tissue…	PMID: 22833869, PMID: 23921897,
		FAOXC225C204m	When glucose production is insufficient, the body shifts to a lipid-based economy. However, the brain cannot oxidize fatty acids for energy, so the production of ketones is protective (1, 2). In summary, the slow rate of b-oxidation of fatty acids seems to be a unique intrinsic feature of the brain tissue, particularly of the mitochondria of neurons. For comparison, in the heart and kidney tissue…	PMID: 22833869, PMID: 23921897,
		FAOXC225C204x	When glucose production is insufficient, the body shifts to a lipid-based economy. However, the brain cannot oxidize fatty acids for energy, so the production of ketones is protective (1, 2). In summary, the slow rate of b-oxidation of fatty acids seems to be a unique intrinsic feature of the brain tissue, particularly of the mitochondria of neurons. For comparison, in the heart and kidney tissue…	PMID: 22833869, PMID: 23921897,
		FAOXC163C143m	When glucose production is insufficient, the body shifts to a lipid-based economy. However, the brain cannot oxidize fatty acids for energy, so the production of ketones is protective (1, 2). In summary, the slow rate of b-oxidation of fatty acids seems to be a unique intrinsic feature of the brain tissue, particularly of the mitochondria of neurons. For comparison, in the heart and kidney tissue…	PMID: 22833869, PMID: 23921897,
		FAOXC164C143m	When glucose production is insufficient, the body shifts to a lipid-based economy. However, the brain cannot oxidize fatty acids for energy, so the production of ketones is protective (1, 2). In summary, the slow rate of b-oxidation of fatty acids seems to be a unique intrinsic feature of the brain tissue, particularly of the mitochondria of neurons. For comparison, in the heart and kidney tissue…	PMID: 22833869, PMID: 23921897,
		FAOXC164C143x	When glucose production is insufficient, the body shifts to a lipid-based economy. However, the brain cannot oxidize fatty acids for energy, so the production of ketones is protective (1, 2). In summary, the slow rate of b-oxidation of fatty acids seems to be a unique intrinsic feature of the brain tissue, particularly of the mitochondria of neurons. For comparison, in the heart and kidney tissue…	PMID: 22833869, PMID: 23921897,
		FAOXC162C142m	When glucose production is insufficient, the body shifts to a lipid-based economy. However, the brain cannot oxidize fatty acids for energy, so the production of ketones is protective (1, 2). In summary, the slow rate of b-oxidation of fatty acids seems to be a unique intrinsic feature of the brain tissue, particularly of the mitochondria of neurons. For comparison, in the heart and kidney tissue…	PMID: 22833869, PMID: 23921897,
		FAOXC163GC142m	When glucose production is insufficient, the body shifts to a lipid-based economy. However, the brain cannot oxidize fatty acids for energy, so the production of ketones is protective (1, 2). In summary, the slow rate of b-oxidation of fatty acids seems to be a unique intrinsic feature of the brain tissue, particularly of the mitochondria of neurons. For comparison, in the heart and kidney tissue…	PMID: 22833869, PMID: 23921897,
		FAOXC163C142x	When glucose production is insufficient, the body shifts to a lipid-based economy. However, the brain cannot oxidize fatty acids for energy, so the production of ketones is protective (1, 2). In summary, the slow rate of b-oxidation of fatty acids seems to be a unique intrinsic feature of the brain tissue, particularly of the mitochondria of neurons. For comparison, in the heart and kidney tissue…	PMID: 22833869, PMID: 23921897,
		FAOXC141C121m	When glucose production is insufficient, the body shifts to a lipid-based economy. However, the brain cannot oxidize fatty acids for energy, so the production of ketones is protective (1, 2). In summary, the slow rate of b-oxidation of fatty acids seems to be a unique intrinsic feature of the brain tissue, particularly of the mitochondria of neurons. For comparison, in the heart and kidney tissue…	PMID: 22833869, PMID: 23921897,
		RE3334M	When glucose production is insufficient, the body shifts to a lipid-based economy. However, the brain cannot oxidize fatty acids for energy, so the production of ketones is protective (1, 2). In summary, the slow rate of b-oxidation of fatty acids seems to be a unique intrinsic feature of the brain tissue, particularly of the mitochondria of neurons. For comparison, in the heart and kidney tissue…	PMID: 22833869, PMID: 23921897,
		RE3341M	When glucose production is insufficient, the body shifts to a lipid-based economy. However, the brain cannot oxidize fatty acids for energy, so the production of ketones is protective (1, 2). In summary, the slow rate of b-oxidation of fatty acids seems to be a unique intrinsic feature of the brain tissue, particularly of the mitochondria of neurons. For comparison, in the heart and kidney tissue…	PMID: 22833869, PMID: 23921897,
		RE3334X	When glucose production is insufficient, the body shifts to a lipid-based economy. However, the brain cannot oxidize fatty acids for energy, so the production of ketones is protective (1, 2). In summary, the slow rate of b-oxidation of fatty acids seems to be a unique intrinsic feature of the brain tissue, particularly of the mitochondria of neurons. For comparison, in the heart and kidney tissue…	PMID: 22833869, PMID: 23921897,
		RE3341X	When glucose production is insufficient, the body shifts to a lipid-based economy. However, the brain cannot oxidize fatty acids for energy, so the production of ketones is protective (1, 2). In summary, the slow rate of b-oxidation of fatty acids seems to be a unique intrinsic feature of the brain tissue, particularly of the mitochondria of neurons. For comparison, in the heart and kidney tissue…	PMID: 22833869, PMID: 23921897,
		FAOXC161C141x	When glucose production is insufficient, the body shifts to a lipid-based economy. However, the brain cannot oxidize fatty acids for energy, so the production of ketones is protective (1, 2). In summary, the slow rate of b-oxidation of fatty acids seems to be a unique intrinsic feature of the brain tissue, particularly of the mitochondria of neurons. For comparison, in the heart and kidney tissue…	PMID: 22833869, PMID: 23921897,
		RE3389M	When glucose production is insufficient, the body shifts to a lipid-based economy. However, the brain cannot oxidize fatty acids for energy, so the production of ketones is protective (1, 2). In summary, the slow rate of b-oxidation of fatty acids seems to be a unique intrinsic feature of the brain tissue, particularly of the mitochondria of neurons. For comparison, in the heart and kidney tissue…	PMID: 22833869, PMID: 23921897,
		RE3395M	When glucose production is insufficient, the body shifts to a lipid-based economy. However, the brain cannot oxidize fatty acids for energy, so the production of ketones is protective (1, 2). In summary, the slow rate of b-oxidation of fatty acids seems to be a unique intrinsic feature of the brain tissue, particularly of the mitochondria of neurons. For comparison, in the heart and kidney tissue…	PMID: 22833869, PMID: 23921897,
		RE3392M	When glucose production is insufficient, the body shifts to a lipid-based economy. However, the brain cannot oxidize fatty acids for energy, so the production of ketones is protective (1, 2). In summary, the slow rate of b-oxidation of fatty acids seems to be a unique intrinsic feature of the brain tissue, particularly of the mitochondria of neurons. For comparison, in the heart and kidney tissue…	PMID: 22833869, PMID: 23921897,
		RE3404M	When glucose production is insufficient, the body shifts to a lipid-based economy. However, the brain cannot oxidize fatty acids for energy, so the production of ketones is protective (1, 2). In summary, the slow rate of b-oxidation of fatty acids seems to be a unique intrinsic feature of the brain tissue, particularly of the mitochondria of neurons. For comparison, in the heart and kidney tissue…	PMID: 22833869, PMID: 23921897,
		RE3384M	When glucose production is insufficient, the body shifts to a lipid-based economy. However, the brain cannot oxidize fatty acids for energy, so the production of ketones is protective (1, 2). In summary, the slow rate of b-oxidation of fatty acids seems to be a unique intrinsic feature of the brain tissue, particularly of the mitochondria of neurons. For comparison, in the heart and kidney tissue…	PMID: 22833869, PMID: 23921897,
		RE3394M	When glucose production is insufficient, the body shifts to a lipid-based economy. However, the brain cannot oxidize fatty acids for energy, so the production of ketones is protective (1, 2). In summary, the slow rate of b-oxidation of fatty acids seems to be a unique intrinsic feature of the brain tissue, particularly of the mitochondria of neurons. For comparison, in the heart and kidney tissue…	PMID: 22833869, PMID: 23921897,
		FAOXC183C163m	When glucose production is insufficient, the body shifts to a lipid-based economy. However, the brain cannot oxidize fatty acids for energy, so the production of ketones is protective (1, 2). In summary, the slow rate of b-oxidation of fatty acids seems to be a unique intrinsic feature of the brain tissue, particularly of the mitochondria of neurons. For comparison, in the heart and kidney tissue…	PMID: 22833869, PMID: 23921897,
		FAOXC182C162m	When glucose production is insufficient, the body shifts to a lipid-based economy. However, the brain cannot oxidize fatty acids for energy, so the production of ketones is protective (1, 2). In summary, the slow rate of b-oxidation of fatty acids seems to be a unique intrinsic feature of the brain tissue, particularly of the mitochondria of neurons. For comparison, in the heart and kidney tissue…	PMID: 22833869, PMID: 23921897,
		FAOXC181C161x	When glucose production is insufficient, the body shifts to a lipid-based economy. However, the brain cannot oxidize fatty acids for energy, so the production of ketones is protective (1, 2). In summary, the slow rate of b-oxidation of fatty acids seems to be a unique intrinsic feature of the brain tissue, particularly of the mitochondria of neurons. For comparison, in the heart and kidney tissue…	PMID: 22833869, PMID: 23921897,
		FAOXC161C141m	When glucose production is insufficient, the body shifts to a lipid-based economy. However, the brain cannot oxidize fatty acids for energy, so the production of ketones is protective (1, 2). In summary, the slow rate of b-oxidation of fatty acids seems to be a unique intrinsic feature of the brain tissue, particularly of the mitochondria of neurons. For comparison, in the heart and kidney tissue…	PMID: 22833869, PMID: 23921897,
		RE3385M	When glucose production is insufficient, the body shifts to a lipid-based economy. However, the brain cannot oxidize fatty acids for energy, so the production of ketones is protective (1, 2). In summary, the slow rate of b-oxidation of fatty acids seems to be a unique intrinsic feature of the brain tissue, particularly of the mitochondria of neurons. For comparison, in the heart and kidney tissue…	PMID: 22833869, PMID: 23921897,
		RE3397M	When glucose production is insufficient, the body shifts to a lipid-based economy. However, the brain cannot oxidize fatty acids for energy, so the production of ketones is protective (1, 2). In summary, the slow rate of b-oxidation of fatty acids seems to be a unique intrinsic feature of the brain tissue, particularly of the mitochondria of neurons. For comparison, in the heart and kidney tissue…	PMID: 22833869, PMID: 23921897,
		RE3391M	When glucose production is insufficient, the body shifts to a lipid-based economy. However, the brain cannot oxidize fatty acids for energy, so the production of ketones is protective (1, 2). In summary, the slow rate of b-oxidation of fatty acids seems to be a unique intrinsic feature of the brain tissue, particularly of the mitochondria of neurons. For comparison, in the heart and kidney tissue…	PMID: 22833869, PMID: 23921897,
		RE3403M	When glucose production is insufficient, the body shifts to a lipid-based economy. However, the brain cannot oxidize fatty acids for energy, so the production of ketones is protective (1, 2). In summary, the slow rate of b-oxidation of fatty acids seems to be a unique intrinsic feature of the brain tissue, particularly of the mitochondria of neurons. For comparison, in the heart and kidney tissue…	PMID: 22833869, PMID: 23921897,
		RE3383M	When glucose production is insufficient, the body shifts to a lipid-based economy. However, the brain cannot oxidize fatty acids for energy, so the production of ketones is protective (1, 2). In summary, the slow rate of b-oxidation of fatty acids seems to be a unique intrinsic feature of the brain tissue, particularly of the mitochondria of neurons. For comparison, in the heart and kidney tissue…	PMID: 22833869, PMID: 23921897,
		RE3396M	When glucose production is insufficient, the body shifts to a lipid-based economy. However, the brain cannot oxidize fatty acids for energy, so the production of ketones is protective (1, 2). In summary, the slow rate of b-oxidation of fatty acids seems to be a unique intrinsic feature of the brain tissue, particularly of the mitochondria of neurons. For comparison, in the heart and kidney tissue…	PMID: 22833869, PMID: 23921897,
		FAOXC201C181x	When glucose production is insufficient, the body shifts to a lipid-based economy. However, the brain cannot oxidize fatty acids for energy, so the production of ketones is protective (1, 2). In summary, the slow rate of b-oxidation of fatty acids seems to be a unique intrinsic feature of the brain tissue, particularly of the mitochondria of neurons. For comparison, in the heart and kidney tissue…	PMID: 22833869, PMID: 23921897,
		FAOXC226	When glucose production is insufficient, the body shifts to a lipid-based economy. However, the brain cannot oxidize fatty acids for energy, so the production of ketones is protective (1, 2). In summary, the slow rate of b-oxidation of fatty acids seems to be a unique intrinsic feature of the brain tissue, particularly of the mitochondria of neurons. For comparison, in the heart and kidney tissue…	PMID: 22833869, PMID: 23921897,
		FAOXC140	When glucose production is insufficient, the body shifts to a lipid-based economy. However, the brain cannot oxidize fatty acids for energy, so the production of ketones is protective (1, 2). In summary, the slow rate of b-oxidation of fatty acids seems to be a unique intrinsic feature of the brain tissue, particularly of the mitochondria of neurons. For comparison, in the heart and kidney tissue…	PMID: 22833869, PMID: 23921897,
		FAOXC160	When glucose production is insufficient, the body shifts to a lipid-based economy. However, the brain cannot oxidize fatty acids for energy, so the production of ketones is protective (1, 2). In summary, the slow rate of b-oxidation of fatty acids seems to be a unique intrinsic feature of the brain tissue, particularly of the mitochondria of neurons. For comparison, in the heart and kidney tissue…	PMID: 22833869, PMID: 23921897,
		FAOXC204	When glucose production is insufficient, the body shifts to a lipid-based economy. However, the brain cannot oxidize fatty acids for energy, so the production of ketones is protective (1, 2). In summary, the slow rate of b-oxidation of fatty acids seems to be a unique intrinsic feature of the brain tissue, particularly of the mitochondria of neurons. For comparison, in the heart and kidney tissue…	PMID: 22833869, PMID: 23921897,
		FAOXC4C2m	When glucose production is insufficient, the body shifts to a lipid-based economy. However, the brain cannot oxidize fatty acids for energy, so the production of ketones is protective (1, 2). In summary, the slow rate of b-oxidation of fatty acids seems to be a unique intrinsic feature of the brain tissue, particularly of the mitochondria of neurons. For comparison, in the heart and kidney tissue…	PMID: 22833869, PMID: 23921897,
		ADPCOAPTE	When glucose production is insufficient, the body shifts to a lipid-based economy. However, the brain cannot oxidize fatty acids for energy, so the production of ketones is protective (1, 2). In summary, the slow rate of b-oxidation of fatty acids seems to be a unique intrinsic feature of the brain tissue, particularly of the mitochondria of neurons. For comparison, in the heart and kidney tissue…	PMID: 22833869, PMID: 23921897,
		FAOXC8DCC6DCx	When glucose production is insufficient, the body shifts to a lipid-based economy. However, the brain cannot oxidize fatty acids for energy, so the production of ketones is protective (1, 2). In summary, the slow rate of b-oxidation of fatty acids seems to be a unique intrinsic feature of the brain tissue, particularly of the mitochondria of neurons. For comparison, in the heart and kidney tissue…	PMID: 22833869, PMID: 23921897,
		RE3158X	When glucose production is insufficient, the body shifts to a lipid-based economy. However, the brain cannot oxidize fatty acids for energy, so the production of ketones is protective (1, 2). In summary, the slow rate of b-oxidation of fatty acids seems to be a unique intrinsic feature of the brain tissue, particularly of the mitochondria of neurons. For comparison, in the heart and kidney tissue…	PMID: 22833869, PMID: 23921897,
		FAOXC2442246x	When glucose production is insufficient, the body shifts to a lipid-based economy. However, the brain cannot oxidize fatty acids for energy, so the production of ketones is protective (1, 2). In summary, the slow rate of b-oxidation of fatty acids seems to be a unique intrinsic feature of the brain tissue, particularly of the mitochondria of neurons. For comparison, in the heart and kidney tissue…	PMID: 22833869, PMID: 23921897,
		FAOXC2242046m	When glucose production is insufficient, the body shifts to a lipid-based economy. However, the brain cannot oxidize fatty acids for energy, so the production of ketones is protective (1, 2). In summary, the slow rate of b-oxidation of fatty acids seems to be a unique intrinsic feature of the brain tissue, particularly of the mitochondria of neurons. For comparison, in the heart and kidney tissue…	PMID: 22833869, PMID: 23921897,
		FAOXC2242046x	When glucose production is insufficient, the body shifts to a lipid-based economy. However, the brain cannot oxidize fatty acids for energy, so the production of ketones is protective (1, 2). In summary, the slow rate of b-oxidation of fatty acids seems to be a unique intrinsic feature of the brain tissue, particularly of the mitochondria of neurons. For comparison, in the heart and kidney tissue…	PMID: 22833869, PMID: 23921897,
		FAOXC240200x	When glucose production is insufficient, the body shifts to a lipid-based economy. However, the brain cannot oxidize fatty acids for energy, so the production of ketones is protective (1, 2). In summary, the slow rate of b-oxidation of fatty acids seems to be a unique intrinsic feature of the brain tissue, particularly of the mitochondria of neurons. For comparison, in the heart and kidney tissue…	PMID: 22833869, PMID: 23921897,
		FAOXC22C20x	When glucose production is insufficient, the body shifts to a lipid-based economy. However, the brain cannot oxidize fatty acids for energy, so the production of ketones is protective (1, 2). In summary, the slow rate of b-oxidation of fatty acids seems to be a unique intrinsic feature of the brain tissue, particularly of the mitochondria of neurons. For comparison, in the heart and kidney tissue…	PMID: 22833869, PMID: 23921897,
		RE3247M	When glucose production is insufficient, the body shifts to a lipid-based economy. However, the brain cannot oxidize fatty acids for energy, so the production of ketones is protective (1, 2). In summary, the slow rate of b-oxidation of fatty acids seems to be a unique intrinsic feature of the brain tissue, particularly of the mitochondria of neurons. For comparison, in the heart and kidney tissue…	PMID: 22833869, PMID: 23921897,
		RE3247X	When glucose production is insufficient, the body shifts to a lipid-based economy. However, the brain cannot oxidize fatty acids for energy, so the production of ketones is protective (1, 2). In summary, the slow rate of b-oxidation of fatty acids seems to be a unique intrinsic feature of the brain tissue, particularly of the mitochondria of neurons. For comparison, in the heart and kidney tissue…	PMID: 22833869, PMID: 23921897,
		r0287	When glucose production is insufficient, the body shifts to a lipid-based economy. However, the brain cannot oxidize fatty acids for energy, so the production of ketones is protective (1, 2). In summary, the slow rate of b-oxidation of fatty acids seems to be a unique intrinsic feature of the brain tissue, particularly of the mitochondria of neurons. For comparison, in the heart and kidney tissue…	PMID: 22833869, PMID: 23921897,
		FAOXC61C4m	When glucose production is insufficient, the body shifts to a lipid-based economy. However, the brain cannot oxidize fatty acids for energy, so the production of ketones is protective (1, 2). In summary, the slow rate of b-oxidation of fatty acids seems to be a unique intrinsic feature of the brain tissue, particularly of the mitochondria of neurons. For comparison, in the heart and kidney tissue…	PMID: 22833869, PMID: 23921897,
		FAOXC6C4m	When glucose production is insufficient, the body shifts to a lipid-based economy. However, the brain cannot oxidize fatty acids for energy, so the production of ketones is protective (1, 2). In summary, the slow rate of b-oxidation of fatty acids seems to be a unique intrinsic feature of the brain tissue, particularly of the mitochondria of neurons. For comparison, in the heart and kidney tissue…	PMID: 22833869, PMID: 23921897,
		FAOXC61C4x	When glucose production is insufficient, the body shifts to a lipid-based economy. However, the brain cannot oxidize fatty acids for energy, so the production of ketones is protective (1, 2). In summary, the slow rate of b-oxidation of fatty acids seems to be a unique intrinsic feature of the brain tissue, particularly of the mitochondria of neurons. For comparison, in the heart and kidney tissue…	PMID: 22833869, PMID: 23921897,
		FAOXC6C4x	When glucose production is insufficient, the body shifts to a lipid-based economy. However, the brain cannot oxidize fatty acids for energy, so the production of ketones is protective (1, 2). In summary, the slow rate of b-oxidation of fatty acids seems to be a unique intrinsic feature of the brain tissue, particularly of the mitochondria of neurons. For comparison, in the heart and kidney tissue…	PMID: 22833869, PMID: 23921897,
		FAOXC246226x	When glucose production is insufficient, the body shifts to a lipid-based economy. However, the brain cannot oxidize fatty acids for energy, so the production of ketones is protective (1, 2). In summary, the slow rate of b-oxidation of fatty acids seems to be a unique intrinsic feature of the brain tissue, particularly of the mitochondria of neurons. For comparison, in the heart and kidney tissue…	PMID: 22833869, PMID: 23921897,
		RE2920M	When glucose production is insufficient, the body shifts to a lipid-based economy. However, the brain cannot oxidize fatty acids for energy, so the production of ketones is protective (1, 2). In summary, the slow rate of b-oxidation of fatty acids seems to be a unique intrinsic feature of the brain tissue, particularly of the mitochondria of neurons. For comparison, in the heart and kidney tissue…	PMID: 22833869, PMID: 23921897,
		RE2920X	When glucose production is insufficient, the body shifts to a lipid-based economy. However, the brain cannot oxidize fatty acids for energy, so the production of ketones is protective (1, 2). In summary, the slow rate of b-oxidation of fatty acids seems to be a unique intrinsic feature of the brain tissue, particularly of the mitochondria of neurons. For comparison, in the heart and kidney tissue…	PMID: 22833869, PMID: 23921897,
		RE1533M	When glucose production is insufficient, the body shifts to a lipid-based economy. However, the brain cannot oxidize fatty acids for energy, so the production of ketones is protective (1, 2). In summary, the slow rate of b-oxidation of fatty acids seems to be a unique intrinsic feature of the brain tissue, particularly of the mitochondria of neurons. For comparison, in the heart and kidney tissue…	PMID: 22833869, PMID: 23921897,
		RE1533X	When glucose production is insufficient, the body shifts to a lipid-based economy. However, the brain cannot oxidize fatty acids for energy, so the production of ketones is protective (1, 2). In summary, the slow rate of b-oxidation of fatty acids seems to be a unique intrinsic feature of the brain tissue, particularly of the mitochondria of neurons. For comparison, in the heart and kidney tissue…	PMID: 22833869, PMID: 23921897,
		RE1532M	When glucose production is insufficient, the body shifts to a lipid-based economy. However, the brain cannot oxidize fatty acids for energy, so the production of ketones is protective (1, 2). In summary, the slow rate of b-oxidation of fatty acids seems to be a unique intrinsic feature of the brain tissue, particularly of the mitochondria of neurons. For comparison, in the heart and kidney tissue…	PMID: 22833869, PMID: 23921897,
		RE1532X	When glucose production is insufficient, the body shifts to a lipid-based economy. However, the brain cannot oxidize fatty acids for energy, so the production of ketones is protective (1, 2). In summary, the slow rate of b-oxidation of fatty acids seems to be a unique intrinsic feature of the brain tissue, particularly of the mitochondria of neurons. For comparison, in the heart and kidney tissue…	PMID: 22833869, PMID: 23921897,
		RE1531M	When glucose production is insufficient, the body shifts to a lipid-based economy. However, the brain cannot oxidize fatty acids for energy, so the production of ketones is protective (1, 2). In summary, the slow rate of b-oxidation of fatty acids seems to be a unique intrinsic feature of the brain tissue, particularly of the mitochondria of neurons. For comparison, in the heart and kidney tissue…	PMID: 22833869, PMID: 23921897,
		RE1531X	When glucose production is insufficient, the body shifts to a lipid-based economy. However, the brain cannot oxidize fatty acids for energy, so the production of ketones is protective (1, 2). In summary, the slow rate of b-oxidation of fatty acids seems to be a unique intrinsic feature of the brain tissue, particularly of the mitochondria of neurons. For comparison, in the heart and kidney tissue…	PMID: 22833869, PMID: 23921897,
		FAOXTC101TC102m	When glucose production is insufficient, the body shifts to a lipid-based economy. However, the brain cannot oxidize fatty acids for energy, so the production of ketones is protective (1, 2). In summary, the slow rate of b-oxidation of fatty acids seems to be a unique intrinsic feature of the brain tissue, particularly of the mitochondria of neurons. For comparison, in the heart and kidney tissue…	PMID: 22833869, PMID: 23921897,
		RE3006M	When glucose production is insufficient, the body shifts to a lipid-based economy. However, the brain cannot oxidize fatty acids for energy, so the production of ketones is protective (1, 2). In summary, the slow rate of b-oxidation of fatty acids seems to be a unique intrinsic feature of the brain tissue, particularly of the mitochondria of neurons. For comparison, in the heart and kidney tissue…	PMID: 22833869, PMID: 23921897,
		RE1534M	When glucose production is insufficient, the body shifts to a lipid-based economy. However, the brain cannot oxidize fatty acids for energy, so the production of ketones is protective (1, 2). In summary, the slow rate of b-oxidation of fatty acids seems to be a unique intrinsic feature of the brain tissue, particularly of the mitochondria of neurons. For comparison, in the heart and kidney tissue…	PMID: 22833869, PMID: 23921897,
		RE1534X	When glucose production is insufficient, the body shifts to a lipid-based economy. However, the brain cannot oxidize fatty acids for energy, so the production of ketones is protective (1, 2). In summary, the slow rate of b-oxidation of fatty acids seems to be a unique intrinsic feature of the brain tissue, particularly of the mitochondria of neurons. For comparison, in the heart and kidney tissue…	PMID: 22833869, PMID: 23921897,
		r1479	When glucose production is insufficient, the body shifts to a lipid-based economy. However, the brain cannot oxidize fatty acids for energy, so the production of ketones is protective (1, 2). In summary, the slow rate of b-oxidation of fatty acids seems to be a unique intrinsic feature of the brain tissue, particularly of the mitochondria of neurons. For comparison, in the heart and kidney tissue…	PMID: 22833869, PMID: 23921897,
		DCIm	When glucose production is insufficient, the body shifts to a lipid-based economy. However, the brain cannot oxidize fatty acids for energy, so the production of ketones is protective (1, 2). In summary, the slow rate of b-oxidation of fatty acids seems to be a unique intrinsic feature of the brain tissue, particularly of the mitochondria of neurons. For comparison, in the heart and kidney tissue…	PMID: 22833869, PMID: 23921897,
		FAOXC141C121x	When glucose production is insufficient, the body shifts to a lipid-based economy. However, the brain cannot oxidize fatty acids for energy, so the production of ketones is protective (1, 2). In summary, the slow rate of b-oxidation of fatty acids seems to be a unique intrinsic feature of the brain tissue, particularly of the mitochondria of neurons. For comparison, in the heart and kidney tissue…	PMID: 22833869, PMID: 23921897,
		RE2915M	When glucose production is insufficient, the body shifts to a lipid-based economy. However, the brain cannot oxidize fatty acids for energy, so the production of ketones is protective (1, 2). In summary, the slow rate of b-oxidation of fatty acids seems to be a unique intrinsic feature of the brain tissue, particularly of the mitochondria of neurons. For comparison, in the heart and kidney tissue…	PMID: 22833869, PMID: 23921897,
		RE2917M	When glucose production is insufficient, the body shifts to a lipid-based economy. However, the brain cannot oxidize fatty acids for energy, so the production of ketones is protective (1, 2). In summary, the slow rate of b-oxidation of fatty acids seems to be a unique intrinsic feature of the brain tissue, particularly of the mitochondria of neurons. For comparison, in the heart and kidney tissue…	PMID: 22833869, PMID: 23921897,
		RE2915X	When glucose production is insufficient, the body shifts to a lipid-based economy. However, the brain cannot oxidize fatty acids for energy, so the production of ketones is protective (1, 2). In summary, the slow rate of b-oxidation of fatty acids seems to be a unique intrinsic feature of the brain tissue, particularly of the mitochondria of neurons. For comparison, in the heart and kidney tissue…	PMID: 22833869, PMID: 23921897,
		RE2917X	When glucose production is insufficient, the body shifts to a lipid-based economy. However, the brain cannot oxidize fatty acids for energy, so the production of ketones is protective (1, 2). In summary, the slow rate of b-oxidation of fatty acids seems to be a unique intrinsic feature of the brain tissue, particularly of the mitochondria of neurons. For comparison, in the heart and kidney tissue…	PMID: 22833869, PMID: 23921897,
		RE2916M	When glucose production is insufficient, the body shifts to a lipid-based economy. However, the brain cannot oxidize fatty acids for energy, so the production of ketones is protective (1, 2). In summary, the slow rate of b-oxidation of fatty acids seems to be a unique intrinsic feature of the brain tissue, particularly of the mitochondria of neurons. For comparison, in the heart and kidney tissue…	PMID: 22833869, PMID: 23921897,
		RE2916X	When glucose production is insufficient, the body shifts to a lipid-based economy. However, the brain cannot oxidize fatty acids for energy, so the production of ketones is protective (1, 2). In summary, the slow rate of b-oxidation of fatty acids seems to be a unique intrinsic feature of the brain tissue, particularly of the mitochondria of neurons. For comparison, in the heart and kidney tissue…	PMID: 22833869, PMID: 23921897,
		FAOXC2452253x	When glucose production is insufficient, the body shifts to a lipid-based economy. However, the brain cannot oxidize fatty acids for energy, so the production of ketones is protective (1, 2). In summary, the slow rate of b-oxidation of fatty acids seems to be a unique intrinsic feature of the brain tissue, particularly of the mitochondria of neurons. For comparison, in the heart and kidney tissue…	PMID: 22833869, PMID: 23921897,
		ETF	When glucose production is insufficient, the body shifts to a lipid-based economy. However, the brain cannot oxidize fatty acids for energy, so the production of ketones is protective (1, 2). In summary, the slow rate of b-oxidation of fatty acids seems to be a unique intrinsic feature of the brain tissue, particularly of the mitochondria of neurons. For comparison, in the heart and kidney tissue…	PMID: 22833869, PMID: 23921897,
		ETFQO	When glucose production is insufficient, the body shifts to a lipid-based economy. However, the brain cannot oxidize fatty acids for energy, so the production of ketones is protective (1, 2). In summary, the slow rate of b-oxidation of fatty acids seems to be a unique intrinsic feature of the brain tissue, particularly of the mitochondria of neurons. For comparison, in the heart and kidney tissue…	PMID: 22833869, PMID: 23921897,
		r1446	When glucose production is insufficient, the body shifts to a lipid-based economy. However, the brain cannot oxidize fatty acids for energy, so the production of ketones is protective (1, 2). In summary, the slow rate of b-oxidation of fatty acids seems to be a unique intrinsic feature of the brain tissue, particularly of the mitochondria of neurons. For comparison, in the heart and kidney tissue…	PMID: 22833869, PMID: 23921897,
		r0724	When glucose production is insufficient, the body shifts to a lipid-based economy. However, the brain cannot oxidize fatty acids for energy, so the production of ketones is protective (1, 2). In summary, the slow rate of b-oxidation of fatty acids seems to be a unique intrinsic feature of the brain tissue, particularly of the mitochondria of neurons. For comparison, in the heart and kidney tissue…	PMID: 22833869, PMID: 23921897,
		FAOXC12C10m	When glucose production is insufficient, the body shifts to a lipid-based economy. However, the brain cannot oxidize fatty acids for energy, so the production of ketones is protective (1, 2). In summary, the slow rate of b-oxidation of fatty acids seems to be a unique intrinsic feature of the brain tissue, particularly of the mitochondria of neurons. For comparison, in the heart and kidney tissue…	PMID: 22833869, PMID: 23921897,
		FAOXC121C10x	When glucose production is insufficient, the body shifts to a lipid-based economy. However, the brain cannot oxidize fatty acids for energy, so the production of ketones is protective (1, 2). In summary, the slow rate of b-oxidation of fatty acids seems to be a unique intrinsic feature of the brain tissue, particularly of the mitochondria of neurons. For comparison, in the heart and kidney tissue…	PMID: 22833869, PMID: 23921897,
		FAOXC12C10x	When glucose production is insufficient, the body shifts to a lipid-based economy. However, the brain cannot oxidize fatty acids for energy, so the production of ketones is protective (1, 2). In summary, the slow rate of b-oxidation of fatty acids seems to be a unique intrinsic feature of the brain tissue, particularly of the mitochondria of neurons. For comparison, in the heart and kidney tissue…	PMID: 22833869, PMID: 23921897,
		ACACT5p	When glucose production is insufficient, the body shifts to a lipid-based economy. However, the brain cannot oxidize fatty acids for energy, so the production of ketones is protective (1, 2). In summary, the slow rate of b-oxidation of fatty acids seems to be a unique intrinsic feature of the brain tissue, particularly of the mitochondria of neurons. For comparison, in the heart and kidney tissue…	PMID: 22833869, PMID: 23921897,
		RE3139X	When glucose production is insufficient, the body shifts to a lipid-based economy. However, the brain cannot oxidize fatty acids for energy, so the production of ketones is protective (1, 2). In summary, the slow rate of b-oxidation of fatty acids seems to be a unique intrinsic feature of the brain tissue, particularly of the mitochondria of neurons. For comparison, in the heart and kidney tissue…	PMID: 22833869, PMID: 23921897,
		FAOXC2452256x	When glucose production is insufficient, the body shifts to a lipid-based economy. However, the brain cannot oxidize fatty acids for energy, so the production of ketones is protective (1, 2). In summary, the slow rate of b-oxidation of fatty acids seems to be a unique intrinsic feature of the brain tissue, particularly of the mitochondria of neurons. For comparison, in the heart and kidney tissue…	PMID: 22833869, PMID: 23921897,
		FAOXC24C22x	When glucose production is insufficient, the body shifts to a lipid-based economy. However, the brain cannot oxidize fatty acids for energy, so the production of ketones is protective (1, 2). In summary, the slow rate of b-oxidation of fatty acids seems to be a unique intrinsic feature of the brain tissue, particularly of the mitochondria of neurons. For comparison, in the heart and kidney tissue…	PMID: 22833869, PMID: 23921897,
		C12DCACOT	When glucose production is insufficient, the body shifts to a lipid-based economy. However, the brain cannot oxidize fatty acids for energy, so the production of ketones is protective (1, 2). In summary, the slow rate of b-oxidation of fatty acids seems to be a unique intrinsic feature of the brain tissue, particularly of the mitochondria of neurons. For comparison, in the heart and kidney tissue…	PMID: 22833869, PMID: 23921897,
		FAOXC14DCC12DCx	When glucose production is insufficient, the body shifts to a lipid-based economy. However, the brain cannot oxidize fatty acids for energy, so the production of ketones is protective (1, 2). In summary, the slow rate of b-oxidation of fatty acids seems to be a unique intrinsic feature of the brain tissue, particularly of the mitochondria of neurons. For comparison, in the heart and kidney tissue…	PMID: 22833869, PMID: 23921897,
		r0639	When glucose production is insufficient, the body shifts to a lipid-based economy. However, the brain cannot oxidize fatty acids for energy, so the production of ketones is protective (1, 2). In summary, the slow rate of b-oxidation of fatty acids seems to be a unique intrinsic feature of the brain tissue, particularly of the mitochondria of neurons. For comparison, in the heart and kidney tissue…	PMID: 22833869, PMID: 23921897,
		FAOXC14C12m	When glucose production is insufficient, the body shifts to a lipid-based economy. However, the brain cannot oxidize fatty acids for energy, so the production of ketones is protective (1, 2). In summary, the slow rate of b-oxidation of fatty acids seems to be a unique intrinsic feature of the brain tissue, particularly of the mitochondria of neurons. For comparison, in the heart and kidney tissue…	PMID: 22833869, PMID: 23921897,
		FAOXC14C12x	When glucose production is insufficient, the body shifts to a lipid-based economy. However, the brain cannot oxidize fatty acids for energy, so the production of ketones is protective (1, 2). In summary, the slow rate of b-oxidation of fatty acids seems to be a unique intrinsic feature of the brain tissue, particularly of the mitochondria of neurons. For comparison, in the heart and kidney tissue…	PMID: 22833869, PMID: 23921897,
		ACACT6p	When glucose production is insufficient, the body shifts to a lipid-based economy. However, the brain cannot oxidize fatty acids for energy, so the production of ketones is protective (1, 2). In summary, the slow rate of b-oxidation of fatty acids seems to be a unique intrinsic feature of the brain tissue, particularly of the mitochondria of neurons. For comparison, in the heart and kidney tissue…	PMID: 22833869, PMID: 23921897,
		RE2985M	When glucose production is insufficient, the body shifts to a lipid-based economy. However, the brain cannot oxidize fatty acids for energy, so the production of ketones is protective (1, 2). In summary, the slow rate of b-oxidation of fatty acids seems to be a unique intrinsic feature of the brain tissue, particularly of the mitochondria of neurons. For comparison, in the heart and kidney tissue…	PMID: 22833869, PMID: 23921897,
		RE2985X	When glucose production is insufficient, the body shifts to a lipid-based economy. However, the brain cannot oxidize fatty acids for energy, so the production of ketones is protective (1, 2). In summary, the slow rate of b-oxidation of fatty acids seems to be a unique intrinsic feature of the brain tissue, particularly of the mitochondria of neurons. For comparison, in the heart and kidney tissue…	PMID: 22833869, PMID: 23921897,
		FAOXC2031836m	When glucose production is insufficient, the body shifts to a lipid-based economy. However, the brain cannot oxidize fatty acids for energy, so the production of ketones is protective (1, 2). In summary, the slow rate of b-oxidation of fatty acids seems to be a unique intrinsic feature of the brain tissue, particularly of the mitochondria of neurons. For comparison, in the heart and kidney tissue…	PMID: 22833869, PMID: 23921897,
		FAOXC2251836m	When glucose production is insufficient, the body shifts to a lipid-based economy. However, the brain cannot oxidize fatty acids for energy, so the production of ketones is protective (1, 2). In summary, the slow rate of b-oxidation of fatty acids seems to be a unique intrinsic feature of the brain tissue, particularly of the mitochondria of neurons. For comparison, in the heart and kidney tissue…	PMID: 22833869, PMID: 23921897,
		FAOXC2251836x	When glucose production is insufficient, the body shifts to a lipid-based economy. However, the brain cannot oxidize fatty acids for energy, so the production of ketones is protective (1, 2). In summary, the slow rate of b-oxidation of fatty acids seems to be a unique intrinsic feature of the brain tissue, particularly of the mitochondria of neurons. For comparison, in the heart and kidney tissue…	PMID: 22833869, PMID: 23921897,
		RE2988X	When glucose production is insufficient, the body shifts to a lipid-based economy. However, the brain cannot oxidize fatty acids for energy, so the production of ketones is protective (1, 2). In summary, the slow rate of b-oxidation of fatty acids seems to be a unique intrinsic feature of the brain tissue, particularly of the mitochondria of neurons. For comparison, in the heart and kidney tissue…	PMID: 22833869, PMID: 23921897,
		FAOXC9C7m	When glucose production is insufficient, the body shifts to a lipid-based economy. However, the brain cannot oxidize fatty acids for energy, so the production of ketones is protective (1, 2). In summary, the slow rate of b-oxidation of fatty acids seems to be a unique intrinsic feature of the brain tissue, particularly of the mitochondria of neurons. For comparison, in the heart and kidney tissue…	PMID: 22833869, PMID: 23921897,
		r0310	When glucose production is insufficient, the body shifts to a lipid-based economy. However, the brain cannot oxidize fatty acids for energy, so the production of ketones is protective (1, 2). In summary, the slow rate of b-oxidation of fatty acids seems to be a unique intrinsic feature of the brain tissue, particularly of the mitochondria of neurons. For comparison, in the heart and kidney tissue…	PMID: 22833869, PMID: 23921897,
		ACOAO7p	When glucose production is insufficient, the body shifts to a lipid-based economy. However, the brain cannot oxidize fatty acids for energy, so the production of ketones is protective (1, 2). In summary, the slow rate of b-oxidation of fatty acids seems to be a unique intrinsic feature of the brain tissue, particularly of the mitochondria of neurons. For comparison, in the heart and kidney tissue…	PMID: 22833869, PMID: 23921897,
		FAOXC181C161m	When glucose production is insufficient, the body shifts to a lipid-based economy. However, the brain cannot oxidize fatty acids for energy, so the production of ketones is protective (1, 2). In summary, the slow rate of b-oxidation of fatty acids seems to be a unique intrinsic feature of the brain tissue, particularly of the mitochondria of neurons. For comparison, in the heart and kidney tissue…	PMID: 22833869, PMID: 23921897,
		r0732	When glucose production is insufficient, the body shifts to a lipid-based economy. However, the brain cannot oxidize fatty acids for energy, so the production of ketones is protective (1, 2). In summary, the slow rate of b-oxidation of fatty acids seems to be a unique intrinsic feature of the brain tissue, particularly of the mitochondria of neurons. For comparison, in the heart and kidney tissue…	PMID: 22833869, PMID: 23921897,
		r1450	When glucose production is insufficient, the body shifts to a lipid-based economy. However, the brain cannot oxidize fatty acids for energy, so the production of ketones is protective (1, 2). In summary, the slow rate of b-oxidation of fatty acids seems to be a unique intrinsic feature of the brain tissue, particularly of the mitochondria of neurons. For comparison, in the heart and kidney tissue…	PMID: 22833869, PMID: 23921897,
		r0729	When glucose production is insufficient, the body shifts to a lipid-based economy. However, the brain cannot oxidize fatty acids for energy, so the production of ketones is protective (1, 2). In summary, the slow rate of b-oxidation of fatty acids seems to be a unique intrinsic feature of the brain tissue, particularly of the mitochondria of neurons. For comparison, in the heart and kidney tissue…	PMID: 22833869, PMID: 23921897,
		r0734	When glucose production is insufficient, the body shifts to a lipid-based economy. However, the brain cannot oxidize fatty acids for energy, so the production of ketones is protective (1, 2). In summary, the slow rate of b-oxidation of fatty acids seems to be a unique intrinsic feature of the brain tissue, particularly of the mitochondria of neurons. For comparison, in the heart and kidney tissue…	PMID: 22833869, PMID: 23921897,
		r0731	When glucose production is insufficient, the body shifts to a lipid-based economy. However, the brain cannot oxidize fatty acids for energy, so the production of ketones is protective (1, 2). In summary, the slow rate of b-oxidation of fatty acids seems to be a unique intrinsic feature of the brain tissue, particularly of the mitochondria of neurons. For comparison, in the heart and kidney tissue…	PMID: 22833869, PMID: 23921897,
		RE3191M	When glucose production is insufficient, the body shifts to a lipid-based economy. However, the brain cannot oxidize fatty acids for energy, so the production of ketones is protective (1, 2). In summary, the slow rate of b-oxidation of fatty acids seems to be a unique intrinsic feature of the brain tissue, particularly of the mitochondria of neurons. For comparison, in the heart and kidney tissue…	PMID: 22833869, PMID: 23921897,
		FAOXC260240x	When glucose production is insufficient, the body shifts to a lipid-based economy. However, the brain cannot oxidize fatty acids for energy, so the production of ketones is protective (1, 2). In summary, the slow rate of b-oxidation of fatty acids seems to be a unique intrinsic feature of the brain tissue, particularly of the mitochondria of neurons. For comparison, in the heart and kidney tissue…	PMID: 22833869, PMID: 23921897,
		FAOXC241181x	When glucose production is insufficient, the body shifts to a lipid-based economy. However, the brain cannot oxidize fatty acids for energy, so the production of ketones is protective (1, 2). In summary, the slow rate of b-oxidation of fatty acids seems to be a unique intrinsic feature of the brain tissue, particularly of the mitochondria of neurons. For comparison, in the heart and kidney tissue…	PMID: 22833869, PMID: 23921897,
		FAOXC16080m	When glucose production is insufficient, the body shifts to a lipid-based economy. However, the brain cannot oxidize fatty acids for energy, so the production of ketones is protective (1, 2). In summary, the slow rate of b-oxidation of fatty acids seems to be a unique intrinsic feature of the brain tissue, particularly of the mitochondria of neurons. For comparison, in the heart and kidney tissue…	PMID: 22833869, PMID: 23921897,
		FAOXC16080x	When glucose production is insufficient, the body shifts to a lipid-based economy. However, the brain cannot oxidize fatty acids for energy, so the production of ketones is protective (1, 2). In summary, the slow rate of b-oxidation of fatty acids seems to be a unique intrinsic feature of the brain tissue, particularly of the mitochondria of neurons. For comparison, in the heart and kidney tissue…	PMID: 22833869, PMID: 23921897,
		FAOXC161802m	When glucose production is insufficient, the body shifts to a lipid-based economy. However, the brain cannot oxidize fatty acids for energy, so the production of ketones is protective (1, 2). In summary, the slow rate of b-oxidation of fatty acids seems to be a unique intrinsic feature of the brain tissue, particularly of the mitochondria of neurons. For comparison, in the heart and kidney tissue…	PMID: 22833869, PMID: 23921897,
		FAOXC16180m	When glucose production is insufficient, the body shifts to a lipid-based economy. However, the brain cannot oxidize fatty acids for energy, so the production of ketones is protective (1, 2). In summary, the slow rate of b-oxidation of fatty acids seems to be a unique intrinsic feature of the brain tissue, particularly of the mitochondria of neurons. For comparison, in the heart and kidney tissue…	PMID: 22833869, PMID: 23921897,
		FAOXC1811601m	When glucose production is insufficient, the body shifts to a lipid-based economy. However, the brain cannot oxidize fatty acids for energy, so the production of ketones is protective (1, 2). In summary, the slow rate of b-oxidation of fatty acids seems to be a unique intrinsic feature of the brain tissue, particularly of the mitochondria of neurons. For comparison, in the heart and kidney tissue…	PMID: 22833869, PMID: 23921897,
		FAOXC1811602m	When glucose production is insufficient, the body shifts to a lipid-based economy. However, the brain cannot oxidize fatty acids for energy, so the production of ketones is protective (1, 2). In summary, the slow rate of b-oxidation of fatty acids seems to be a unique intrinsic feature of the brain tissue, particularly of the mitochondria of neurons. For comparison, in the heart and kidney tissue…	PMID: 22833869, PMID: 23921897,
		FAOXC1811603m	When glucose production is insufficient, the body shifts to a lipid-based economy. However, the brain cannot oxidize fatty acids for energy, so the production of ketones is protective (1, 2). In summary, the slow rate of b-oxidation of fatty acids seems to be a unique intrinsic feature of the brain tissue, particularly of the mitochondria of neurons. For comparison, in the heart and kidney tissue…	PMID: 22833869, PMID: 23921897,
		FAOXC182806m	When glucose production is insufficient, the body shifts to a lipid-based economy. However, the brain cannot oxidize fatty acids for energy, so the production of ketones is protective (1, 2). In summary, the slow rate of b-oxidation of fatty acids seems to be a unique intrinsic feature of the brain tissue, particularly of the mitochondria of neurons. For comparison, in the heart and kidney tissue…	PMID: 22833869, PMID: 23921897,
		FAOXC18280m	When glucose production is insufficient, the body shifts to a lipid-based economy. However, the brain cannot oxidize fatty acids for energy, so the production of ketones is protective (1, 2). In summary, the slow rate of b-oxidation of fatty acids seems to be a unique intrinsic feature of the brain tissue, particularly of the mitochondria of neurons. For comparison, in the heart and kidney tissue…	PMID: 22833869, PMID: 23921897,
		FAOXC183803m	When glucose production is insufficient, the body shifts to a lipid-based economy. However, the brain cannot oxidize fatty acids for energy, so the production of ketones is protective (1, 2). In summary, the slow rate of b-oxidation of fatty acids seems to be a unique intrinsic feature of the brain tissue, particularly of the mitochondria of neurons. For comparison, in the heart and kidney tissue…	PMID: 22833869, PMID: 23921897,
		FAOXC183806m	When glucose production is insufficient, the body shifts to a lipid-based economy. However, the brain cannot oxidize fatty acids for energy, so the production of ketones is protective (1, 2). In summary, the slow rate of b-oxidation of fatty acids seems to be a unique intrinsic feature of the brain tissue, particularly of the mitochondria of neurons. For comparison, in the heart and kidney tissue…	PMID: 22833869, PMID: 23921897,
		FAOXC18480m	When glucose production is insufficient, the body shifts to a lipid-based economy. However, the brain cannot oxidize fatty acids for energy, so the production of ketones is protective (1, 2). In summary, the slow rate of b-oxidation of fatty acids seems to be a unique intrinsic feature of the brain tissue, particularly of the mitochondria of neurons. For comparison, in the heart and kidney tissue…	PMID: 22833869, PMID: 23921897,
		FAOXC101C8m	When glucose production is insufficient, the body shifts to a lipid-based economy. However, the brain cannot oxidize fatty acids for energy, so the production of ketones is protective (1, 2). In summary, the slow rate of b-oxidation of fatty acids seems to be a unique intrinsic feature of the brain tissue, particularly of the mitochondria of neurons. For comparison, in the heart and kidney tissue…	PMID: 22833869, PMID: 23921897,
		FAOXC183806x	When glucose production is insufficient, the body shifts to a lipid-based economy. However, the brain cannot oxidize fatty acids for energy, so the production of ketones is protective (1, 2). In summary, the slow rate of b-oxidation of fatty acids seems to be a unique intrinsic feature of the brain tissue, particularly of the mitochondria of neurons. For comparison, in the heart and kidney tissue…	PMID: 22833869, PMID: 23921897,
		FAOXC18480x	When glucose production is insufficient, the body shifts to a lipid-based economy. However, the brain cannot oxidize fatty acids for energy, so the production of ketones is protective (1, 2). In summary, the slow rate of b-oxidation of fatty acids seems to be a unique intrinsic feature of the brain tissue, particularly of the mitochondria of neurons. For comparison, in the heart and kidney tissue…	PMID: 22833869, PMID: 23921897,
		FAOXC101C8x	When glucose production is insufficient, the body shifts to a lipid-based economy. However, the brain cannot oxidize fatty acids for energy, so the production of ketones is protective (1, 2). In summary, the slow rate of b-oxidation of fatty acids seems to be a unique intrinsic feature of the brain tissue, particularly of the mitochondria of neurons. For comparison, in the heart and kidney tissue…	PMID: 22833869, PMID: 23921897,
		ACACT4p	When glucose production is insufficient, the body shifts to a lipid-based economy. However, the brain cannot oxidize fatty acids for energy, so the production of ketones is protective (1, 2). In summary, the slow rate of b-oxidation of fatty acids seems to be a unique intrinsic feature of the brain tissue, particularly of the mitochondria of neurons. For comparison, in the heart and kidney tissue…	PMID: 22833869, PMID: 23921897,
		r1448	When glucose production is insufficient, the body shifts to a lipid-based economy. However, the brain cannot oxidize fatty acids for energy, so the production of ketones is protective (1, 2). In summary, the slow rate of b-oxidation of fatty acids seems to be a unique intrinsic feature of the brain tissue, particularly of the mitochondria of neurons. For comparison, in the heart and kidney tissue…	PMID: 22833869, PMID: 23921897,
		r1481	When glucose production is insufficient, the body shifts to a lipid-based economy. However, the brain cannot oxidize fatty acids for energy, so the production of ketones is protective (1, 2). In summary, the slow rate of b-oxidation of fatty acids seems to be a unique intrinsic feature of the brain tissue, particularly of the mitochondria of neurons. For comparison, in the heart and kidney tissue…	PMID: 22833869, PMID: 23921897,
		FAOXC180	When glucose production is insufficient, the body shifts to a lipid-based economy. However, the brain cannot oxidize fatty acids for energy, so the production of ketones is protective (1, 2). In summary, the slow rate of b-oxidation of fatty acids seems to be a unique intrinsic feature of the brain tissue, particularly of the mitochondria of neurons. For comparison, in the heart and kidney tissue…	PMID: 22833869, PMID: 23921897,
		FAOXC180x	When glucose production is insufficient, the body shifts to a lipid-based economy. However, the brain cannot oxidize fatty acids for energy, so the production of ketones is protective (1, 2). In summary, the slow rate of b-oxidation of fatty acids seems to be a unique intrinsic feature of the brain tissue, particularly of the mitochondria of neurons. For comparison, in the heart and kidney tissue…	PMID: 22833869, PMID: 23921897,
		ACACT8p	When glucose production is insufficient, the body shifts to a lipid-based economy. However, the brain cannot oxidize fatty acids for energy, so the production of ketones is protective (1, 2). In summary, the slow rate of b-oxidation of fatty acids seems to be a unique intrinsic feature of the brain tissue, particularly of the mitochondria of neurons. For comparison, in the heart and kidney tissue…	PMID: 22833869, PMID: 23921897,
		FAOXC17C15m	When glucose production is insufficient, the body shifts to a lipid-based economy. However, the brain cannot oxidize fatty acids for energy, so the production of ketones is protective (1, 2). In summary, the slow rate of b-oxidation of fatty acids seems to be a unique intrinsic feature of the brain tissue, particularly of the mitochondria of neurons. For comparison, in the heart and kidney tissue…	PMID: 22833869, PMID: 23921897,
		FAOXC7C5m	When glucose production is insufficient, the body shifts to a lipid-based economy. However, the brain cannot oxidize fatty acids for energy, so the production of ketones is protective (1, 2). In summary, the slow rate of b-oxidation of fatty acids seems to be a unique intrinsic feature of the brain tissue, particularly of the mitochondria of neurons. For comparison, in the heart and kidney tissue…	PMID: 22833869, PMID: 23921897,
		FAOXC5C3x	When glucose production is insufficient, the body shifts to a lipid-based economy. However, the brain cannot oxidize fatty acids for energy, so the production of ketones is protective (1, 2). In summary, the slow rate of b-oxidation of fatty acids seems to be a unique intrinsic feature of the brain tissue, particularly of the mitochondria of neurons. For comparison, in the heart and kidney tissue…	PMID: 22833869, PMID: 23921897,
		FAOXC150m	When glucose production is insufficient, the body shifts to a lipid-based economy. However, the brain cannot oxidize fatty acids for energy, so the production of ketones is protective (1, 2). In summary, the slow rate of b-oxidation of fatty acids seems to be a unique intrinsic feature of the brain tissue, particularly of the mitochondria of neurons. For comparison, in the heart and kidney tissue…	PMID: 22833869, PMID: 23921897,
		FAOXC170m	When glucose production is insufficient, the body shifts to a lipid-based economy. However, the brain cannot oxidize fatty acids for energy, so the production of ketones is protective (1, 2). In summary, the slow rate of b-oxidation of fatty acids seems to be a unique intrinsic feature of the brain tissue, particularly of the mitochondria of neurons. For comparison, in the heart and kidney tissue…	PMID: 22833869, PMID: 23921897,
		SEBCOAPET	When glucose production is insufficient, the body shifts to a lipid-based economy. However, the brain cannot oxidize fatty acids for energy, so the production of ketones is protective (1, 2). In summary, the slow rate of b-oxidation of fatty acids seems to be a unique intrinsic feature of the brain tissue, particularly of the mitochondria of neurons. For comparison, in the heart and kidney tissue…	PMID: 22833869, PMID: 23921897,
		FAOXC12DCC10DCx	When glucose production is insufficient, the body shifts to a lipid-based economy. However, the brain cannot oxidize fatty acids for energy, so the production of ketones is protective (1, 2). In summary, the slow rate of b-oxidation of fatty acids seems to be a unique intrinsic feature of the brain tissue, particularly of the mitochondria of neurons. For comparison, in the heart and kidney tissue…	PMID: 22833869, PMID: 23921897,
		FAOXC204184m	When glucose production is insufficient, the body shifts to a lipid-based economy. However, the brain cannot oxidize fatty acids for energy, so the production of ketones is protective (1, 2). In summary, the slow rate of b-oxidation of fatty acids seems to be a unique intrinsic feature of the brain tissue, particularly of the mitochondria of neurons. For comparison, in the heart and kidney tissue…	PMID: 22833869, PMID: 23921897,
		FAOXC2051843m	When glucose production is insufficient, the body shifts to a lipid-based economy. However, the brain cannot oxidize fatty acids for energy, so the production of ketones is protective (1, 2). In summary, the slow rate of b-oxidation of fatty acids seems to be a unique intrinsic feature of the brain tissue, particularly of the mitochondria of neurons. For comparison, in the heart and kidney tissue…	PMID: 22833869, PMID: 23921897,
		FAOXC2051843x	When glucose production is insufficient, the body shifts to a lipid-based economy. However, the brain cannot oxidize fatty acids for energy, so the production of ketones is protective (1, 2). In summary, the slow rate of b-oxidation of fatty acids seems to be a unique intrinsic feature of the brain tissue, particularly of the mitochondria of neurons. For comparison, in the heart and kidney tissue…	PMID: 22833869, PMID: 23921897,
		FAOXC200180m	When glucose production is insufficient, the body shifts to a lipid-based economy. However, the brain cannot oxidize fatty acids for energy, so the production of ketones is protective (1, 2). In summary, the slow rate of b-oxidation of fatty acids seems to be a unique intrinsic feature of the brain tissue, particularly of the mitochondria of neurons. For comparison, in the heart and kidney tissue…	PMID: 22833869, PMID: 23921897,
		FAOXC200180x	When glucose production is insufficient, the body shifts to a lipid-based economy. However, the brain cannot oxidize fatty acids for energy, so the production of ketones is protective (1, 2). In summary, the slow rate of b-oxidation of fatty acids seems to be a unique intrinsic feature of the brain tissue, particularly of the mitochondria of neurons. For comparison, in the heart and kidney tissue…	PMID: 22833869, PMID: 23921897,
		SBCOAACOTx	When glucose production is insufficient, the body shifts to a lipid-based economy. However, the brain cannot oxidize fatty acids for energy, so the production of ketones is protective (1, 2). In summary, the slow rate of b-oxidation of fatty acids seems to be a unique intrinsic feature of the brain tissue, particularly of the mitochondria of neurons. For comparison, in the heart and kidney tissue…	PMID: 22833869, PMID: 23921897,
		SUCCOAPET	When glucose production is insufficient, the body shifts to a lipid-based economy. However, the brain cannot oxidize fatty acids for energy, so the production of ketones is protective (1, 2). In summary, the slow rate of b-oxidation of fatty acids seems to be a unique intrinsic feature of the brain tissue, particularly of the mitochondria of neurons. For comparison, in the heart and kidney tissue…	PMID: 22833869, PMID: 23921897,
		FAOXC6DCC4DCx	When glucose production is insufficient, the body shifts to a lipid-based economy. However, the brain cannot oxidize fatty acids for energy, so the production of ketones is protective (1, 2). In summary, the slow rate of b-oxidation of fatty acids seems to be a unique intrinsic feature of the brain tissue, particularly of the mitochondria of neurons. For comparison, in the heart and kidney tissue…	PMID: 22833869, PMID: 23921897,
		ACACT9p	When glucose production is insufficient, the body shifts to a lipid-based economy. However, the brain cannot oxidize fatty acids for energy, so the production of ketones is protective (1, 2). In summary, the slow rate of b-oxidation of fatty acids seems to be a unique intrinsic feature of the brain tissue, particularly of the mitochondria of neurons. For comparison, in the heart and kidney tissue…	PMID: 22833869, PMID: 23921897,
		FAOXC16DCC14DCx	When glucose production is insufficient, the body shifts to a lipid-based economy. However, the brain cannot oxidize fatty acids for energy, so the production of ketones is protective (1, 2). In summary, the slow rate of b-oxidation of fatty acids seems to be a unique intrinsic feature of the brain tissue, particularly of the mitochondria of neurons. For comparison, in the heart and kidney tissue…	PMID: 22833869, PMID: 23921897,
		r0653	When glucose production is insufficient, the body shifts to a lipid-based economy. However, the brain cannot oxidize fatty acids for energy, so the production of ketones is protective (1, 2). In summary, the slow rate of b-oxidation of fatty acids seems to be a unique intrinsic feature of the brain tissue, particularly of the mitochondria of neurons. For comparison, in the heart and kidney tissue…	PMID: 22833869, PMID: 23921897,
		FAOXC16C14m	When glucose production is insufficient, the body shifts to a lipid-based economy. However, the brain cannot oxidize fatty acids for energy, so the production of ketones is protective (1, 2). In summary, the slow rate of b-oxidation of fatty acids seems to be a unique intrinsic feature of the brain tissue, particularly of the mitochondria of neurons. For comparison, in the heart and kidney tissue…	PMID: 22833869, PMID: 23921897,
		FAOXC16C14x	When glucose production is insufficient, the body shifts to a lipid-based economy. However, the brain cannot oxidize fatty acids for energy, so the production of ketones is protective (1, 2). In summary, the slow rate of b-oxidation of fatty acids seems to be a unique intrinsic feature of the brain tissue, particularly of the mitochondria of neurons. For comparison, in the heart and kidney tissue…	PMID: 22833869, PMID: 23921897,
		ACACT7p	When glucose production is insufficient, the body shifts to a lipid-based economy. However, the brain cannot oxidize fatty acids for energy, so the production of ketones is protective (1, 2). In summary, the slow rate of b-oxidation of fatty acids seems to be a unique intrinsic feature of the brain tissue, particularly of the mitochondria of neurons. For comparison, in the heart and kidney tissue…	PMID: 22833869, PMID: 23921897,
		FAOXC2252053m	When glucose production is insufficient, the body shifts to a lipid-based economy. However, the brain cannot oxidize fatty acids for energy, so the production of ketones is protective (1, 2). In summary, the slow rate of b-oxidation of fatty acids seems to be a unique intrinsic feature of the brain tissue, particularly of the mitochondria of neurons. For comparison, in the heart and kidney tissue…	PMID: 22833869, PMID: 23921897,
		FAOXC226205m	When glucose production is insufficient, the body shifts to a lipid-based economy. However, the brain cannot oxidize fatty acids for energy, so the production of ketones is protective (1, 2). In summary, the slow rate of b-oxidation of fatty acids seems to be a unique intrinsic feature of the brain tissue, particularly of the mitochondria of neurons. For comparison, in the heart and kidney tissue…	PMID: 22833869, PMID: 23921897,
		FAOXC2252053x	When glucose production is insufficient, the body shifts to a lipid-based economy. However, the brain cannot oxidize fatty acids for energy, so the production of ketones is protective (1, 2). In summary, the slow rate of b-oxidation of fatty acids seems to be a unique intrinsic feature of the brain tissue, particularly of the mitochondria of neurons. For comparison, in the heart and kidney tissue…	PMID: 22833869, PMID: 23921897,
		FAOXC226205x	When glucose production is insufficient, the body shifts to a lipid-based economy. However, the brain cannot oxidize fatty acids for energy, so the production of ketones is protective (1, 2). In summary, the slow rate of b-oxidation of fatty acids seems to be a unique intrinsic feature of the brain tissue, particularly of the mitochondria of neurons. For comparison, in the heart and kidney tissue…	PMID: 22833869, PMID: 23921897,
		RE1517M	When glucose production is insufficient, the body shifts to a lipid-based economy. However, the brain cannot oxidize fatty acids for energy, so the production of ketones is protective (1, 2). In summary, the slow rate of b-oxidation of fatty acids seems to be a unique intrinsic feature of the brain tissue, particularly of the mitochondria of neurons. For comparison, in the heart and kidney tissue…	PMID: 22833869, PMID: 23921897,
		RE2992M	When glucose production is insufficient, the body shifts to a lipid-based economy. However, the brain cannot oxidize fatty acids for energy, so the production of ketones is protective (1, 2). In summary, the slow rate of b-oxidation of fatty acids seems to be a unique intrinsic feature of the brain tissue, particularly of the mitochondria of neurons. For comparison, in the heart and kidney tissue…	PMID: 22833869, PMID: 23921897,
		RE1517X	When glucose production is insufficient, the body shifts to a lipid-based economy. However, the brain cannot oxidize fatty acids for energy, so the production of ketones is protective (1, 2). In summary, the slow rate of b-oxidation of fatty acids seems to be a unique intrinsic feature of the brain tissue, particularly of the mitochondria of neurons. For comparison, in the heart and kidney tissue…	PMID: 22833869, PMID: 23921897,
		RE2992X	When glucose production is insufficient, the body shifts to a lipid-based economy. However, the brain cannot oxidize fatty acids for energy, so the production of ketones is protective (1, 2). In summary, the slow rate of b-oxidation of fatty acids seems to be a unique intrinsic feature of the brain tissue, particularly of the mitochondria of neurons. For comparison, in the heart and kidney tissue…	PMID: 22833869, PMID: 23921897,
		RE1516M	When glucose production is insufficient, the body shifts to a lipid-based economy. However, the brain cannot oxidize fatty acids for energy, so the production of ketones is protective (1, 2). In summary, the slow rate of b-oxidation of fatty acids seems to be a unique intrinsic feature of the brain tissue, particularly of the mitochondria of neurons. For comparison, in the heart and kidney tissue…	PMID: 22833869, PMID: 23921897,
		RE1516X	When glucose production is insufficient, the body shifts to a lipid-based economy. However, the brain cannot oxidize fatty acids for energy, so the production of ketones is protective (1, 2). In summary, the slow rate of b-oxidation of fatty acids seems to be a unique intrinsic feature of the brain tissue, particularly of the mitochondria of neurons. For comparison, in the heart and kidney tissue…	PMID: 22833869, PMID: 23921897,
		FAOXC101C102m	When glucose production is insufficient, the body shifts to a lipid-based economy. However, the brain cannot oxidize fatty acids for energy, so the production of ketones is protective (1, 2). In summary, the slow rate of b-oxidation of fatty acids seems to be a unique intrinsic feature of the brain tissue, particularly of the mitochondria of neurons. For comparison, in the heart and kidney tissue…	PMID: 22833869, PMID: 23921897,
		RE3626M	When glucose production is insufficient, the body shifts to a lipid-based economy. However, the brain cannot oxidize fatty acids for energy, so the production of ketones is protective (1, 2). In summary, the slow rate of b-oxidation of fatty acids seems to be a unique intrinsic feature of the brain tissue, particularly of the mitochondria of neurons. For comparison, in the heart and kidney tissue…	PMID: 22833869, PMID: 23921897,
		RE1519X	When glucose production is insufficient, the body shifts to a lipid-based economy. However, the brain cannot oxidize fatty acids for energy, so the production of ketones is protective (1, 2). In summary, the slow rate of b-oxidation of fatty acids seems to be a unique intrinsic feature of the brain tissue, particularly of the mitochondria of neurons. For comparison, in the heart and kidney tissue…	PMID: 22833869, PMID: 23921897,
		RE2913M	When glucose production is insufficient, the body shifts to a lipid-based economy. However, the brain cannot oxidize fatty acids for energy, so the production of ketones is protective (1, 2). In summary, the slow rate of b-oxidation of fatty acids seems to be a unique intrinsic feature of the brain tissue, particularly of the mitochondria of neurons. For comparison, in the heart and kidney tissue…	PMID: 22833869, PMID: 23921897,
		RE2913X	When glucose production is insufficient, the body shifts to a lipid-based economy. However, the brain cannot oxidize fatty acids for energy, so the production of ketones is protective (1, 2). In summary, the slow rate of b-oxidation of fatty acids seems to be a unique intrinsic feature of the brain tissue, particularly of the mitochondria of neurons. For comparison, in the heart and kidney tissue…	PMID: 22833869, PMID: 23921897,
		RE1573M	When glucose production is insufficient, the body shifts to a lipid-based economy. However, the brain cannot oxidize fatty acids for energy, so the production of ketones is protective (1, 2). In summary, the slow rate of b-oxidation of fatty acids seems to be a unique intrinsic feature of the brain tissue, particularly of the mitochondria of neurons. For comparison, in the heart and kidney tissue…	PMID: 22833869, PMID: 23921897,
		RE3624M	When glucose production is insufficient, the body shifts to a lipid-based economy. However, the brain cannot oxidize fatty acids for energy, so the production of ketones is protective (1, 2). In summary, the slow rate of b-oxidation of fatty acids seems to be a unique intrinsic feature of the brain tissue, particularly of the mitochondria of neurons. For comparison, in the heart and kidney tissue…	PMID: 22833869, PMID: 23921897,
		RE1573X	When glucose production is insufficient, the body shifts to a lipid-based economy. However, the brain cannot oxidize fatty acids for energy, so the production of ketones is protective (1, 2). In summary, the slow rate of b-oxidation of fatty acids seems to be a unique intrinsic feature of the brain tissue, particularly of the mitochondria of neurons. For comparison, in the heart and kidney tissue…	PMID: 22833869, PMID: 23921897,
		RE3624X	When glucose production is insufficient, the body shifts to a lipid-based economy. However, the brain cannot oxidize fatty acids for energy, so the production of ketones is protective (1, 2). In summary, the slow rate of b-oxidation of fatty acids seems to be a unique intrinsic feature of the brain tissue, particularly of the mitochondria of neurons. For comparison, in the heart and kidney tissue…	PMID: 22833869, PMID: 23921897,
		RE2914M	When glucose production is insufficient, the body shifts to a lipid-based economy. However, the brain cannot oxidize fatty acids for energy, so the production of ketones is protective (1, 2). In summary, the slow rate of b-oxidation of fatty acids seems to be a unique intrinsic feature of the brain tissue, particularly of the mitochondria of neurons. For comparison, in the heart and kidney tissue…	PMID: 22833869, PMID: 23921897,
		RE2914X	When glucose production is insufficient, the body shifts to a lipid-based economy. However, the brain cannot oxidize fatty acids for energy, so the production of ketones is protective (1, 2). In summary, the slow rate of b-oxidation of fatty acids seems to be a unique intrinsic feature of the brain tissue, particularly of the mitochondria of neurons. For comparison, in the heart and kidney tissue…	PMID: 22833869, PMID: 23921897,
		r1472	When glucose production is insufficient, the body shifts to a lipid-based economy. However, the brain cannot oxidize fatty acids for energy, so the production of ketones is protective (1, 2). In summary, the slow rate of b-oxidation of fatty acids seems to be a unique intrinsic feature of the brain tissue, particularly of the mitochondria of neurons. For comparison, in the heart and kidney tissue…	PMID: 22833869, PMID: 23921897,
		RE3086X	When glucose production is insufficient, the body shifts to a lipid-based economy. However, the brain cannot oxidize fatty acids for energy, so the production of ketones is protective (1, 2). In summary, the slow rate of b-oxidation of fatty acids seems to be a unique intrinsic feature of the brain tissue, particularly of the mitochondria of neurons. For comparison, in the heart and kidney tissue…	PMID: 22833869, PMID: 23921897,
		FAOXTC122m	When glucose production is insufficient, the body shifts to a lipid-based economy. However, the brain cannot oxidize fatty acids for energy, so the production of ketones is protective (1, 2). In summary, the slow rate of b-oxidation of fatty acids seems to be a unique intrinsic feature of the brain tissue, particularly of the mitochondria of neurons. For comparison, in the heart and kidney tissue…	PMID: 22833869, PMID: 23921897,
		RE3145X	When glucose production is insufficient, the body shifts to a lipid-based economy. However, the brain cannot oxidize fatty acids for energy, so the production of ketones is protective (1, 2). In summary, the slow rate of b-oxidation of fatty acids seems to be a unique intrinsic feature of the brain tissue, particularly of the mitochondria of neurons. For comparison, in the heart and kidney tissue…	PMID: 22833869, PMID: 23921897,
		RE3157X	When glucose production is insufficient, the body shifts to a lipid-based economy. However, the brain cannot oxidize fatty acids for energy, so the production of ketones is protective (1, 2). In summary, the slow rate of b-oxidation of fatty acids seems to be a unique intrinsic feature of the brain tissue, particularly of the mitochondria of neurons. For comparison, in the heart and kidney tissue…	PMID: 22833869, PMID: 23921897,
		RE3000M	When glucose production is insufficient, the body shifts to a lipid-based economy. However, the brain cannot oxidize fatty acids for energy, so the production of ketones is protective (1, 2). In summary, the slow rate of b-oxidation of fatty acids seems to be a unique intrinsic feature of the brain tissue, particularly of the mitochondria of neurons. For comparison, in the heart and kidney tissue…	PMID: 22833869, PMID: 23921897,
		RE1518M	When glucose production is insufficient, the body shifts to a lipid-based economy. However, the brain cannot oxidize fatty acids for energy, so the production of ketones is protective (1, 2). In summary, the slow rate of b-oxidation of fatty acids seems to be a unique intrinsic feature of the brain tissue, particularly of the mitochondria of neurons. For comparison, in the heart and kidney tissue…	PMID: 22833869, PMID: 23921897,
		RE2998M	When glucose production is insufficient, the body shifts to a lipid-based economy. However, the brain cannot oxidize fatty acids for energy, so the production of ketones is protective (1, 2). In summary, the slow rate of b-oxidation of fatty acids seems to be a unique intrinsic feature of the brain tissue, particularly of the mitochondria of neurons. For comparison, in the heart and kidney tissue…	PMID: 22833869, PMID: 23921897,
		RE1518X	When glucose production is insufficient, the body shifts to a lipid-based economy. However, the brain cannot oxidize fatty acids for energy, so the production of ketones is protective (1, 2). In summary, the slow rate of b-oxidation of fatty acids seems to be a unique intrinsic feature of the brain tissue, particularly of the mitochondria of neurons. For comparison, in the heart and kidney tissue…	PMID: 22833869, PMID: 23921897,
		FAOXTC142TC122m	When glucose production is insufficient, the body shifts to a lipid-based economy. However, the brain cannot oxidize fatty acids for energy, so the production of ketones is protective (1, 2). In summary, the slow rate of b-oxidation of fatty acids seems to be a unique intrinsic feature of the brain tissue, particularly of the mitochondria of neurons. For comparison, in the heart and kidney tissue…	PMID: 22833869, PMID: 23921897,
		RE2995M	When glucose production is insufficient, the body shifts to a lipid-based economy. However, the brain cannot oxidize fatty acids for energy, so the production of ketones is protective (1, 2). In summary, the slow rate of b-oxidation of fatty acids seems to be a unique intrinsic feature of the brain tissue, particularly of the mitochondria of neurons. For comparison, in the heart and kidney tissue…	PMID: 22833869, PMID: 23921897,
		RE2995X	When glucose production is insufficient, the body shifts to a lipid-based economy. However, the brain cannot oxidize fatty acids for energy, so the production of ketones is protective (1, 2). In summary, the slow rate of b-oxidation of fatty acids seems to be a unique intrinsic feature of the brain tissue, particularly of the mitochondria of neurons. For comparison, in the heart and kidney tissue…	PMID: 22833869, PMID: 23921897,
		RE2996X	When glucose production is insufficient, the body shifts to a lipid-based economy. However, the brain cannot oxidize fatty acids for energy, so the production of ketones is protective (1, 2). In summary, the slow rate of b-oxidation of fatty acids seems to be a unique intrinsic feature of the brain tissue, particularly of the mitochondria of neurons. For comparison, in the heart and kidney tissue…	PMID: 22833869, PMID: 23921897,
		RE3002X	When glucose production is insufficient, the body shifts to a lipid-based economy. However, the brain cannot oxidize fatty acids for energy, so the production of ketones is protective (1, 2). In summary, the slow rate of b-oxidation of fatty acids seems to be a unique intrinsic feature of the brain tissue, particularly of the mitochondria of neurons. For comparison, in the heart and kidney tissue…	PMID: 22833869, PMID: 23921897,
		RE3001M	When glucose production is insufficient, the body shifts to a lipid-based economy. However, the brain cannot oxidize fatty acids for energy, so the production of ketones is protective (1, 2). In summary, the slow rate of b-oxidation of fatty acids seems to be a unique intrinsic feature of the brain tissue, particularly of the mitochondria of neurons. For comparison, in the heart and kidney tissue…	PMID: 22833869, PMID: 23921897,
		RE3003M	When glucose production is insufficient, the body shifts to a lipid-based economy. However, the brain cannot oxidize fatty acids for energy, so the production of ketones is protective (1, 2). In summary, the slow rate of b-oxidation of fatty acids seems to be a unique intrinsic feature of the brain tissue, particularly of the mitochondria of neurons. For comparison, in the heart and kidney tissue…	PMID: 22833869, PMID: 23921897,
		RE3627C	When glucose production is insufficient, the body shifts to a lipid-based economy. However, the brain cannot oxidize fatty acids for energy, so the production of ketones is protective (1, 2). In summary, the slow rate of b-oxidation of fatty acids seems to be a unique intrinsic feature of the brain tissue, particularly of the mitochondria of neurons. For comparison, in the heart and kidney tissue…	PMID: 22833869, PMID: 23921897,
		FAOXC102C101m	When glucose production is insufficient, the body shifts to a lipid-based economy. However, the brain cannot oxidize fatty acids for energy, so the production of ketones is protective (1, 2). In summary, the slow rate of b-oxidation of fatty acids seems to be a unique intrinsic feature of the brain tissue, particularly of the mitochondria of neurons. For comparison, in the heart and kidney tissue…	PMID: 22833869, PMID: 23921897,
		RE3628M	When glucose production is insufficient, the body shifts to a lipid-based economy. However, the brain cannot oxidize fatty acids for energy, so the production of ketones is protective (1, 2). In summary, the slow rate of b-oxidation of fatty acids seems to be a unique intrinsic feature of the brain tissue, particularly of the mitochondria of neurons. For comparison, in the heart and kidney tissue…	PMID: 22833869, PMID: 23921897,
		FAOXC102C101x	When glucose production is insufficient, the body shifts to a lipid-based economy. However, the brain cannot oxidize fatty acids for energy, so the production of ketones is protective (1, 2). In summary, the slow rate of b-oxidation of fatty acids seems to be a unique intrinsic feature of the brain tissue, particularly of the mitochondria of neurons. For comparison, in the heart and kidney tissue…	PMID: 22833869, PMID: 23921897,
		FAOXTC122TC101m	When glucose production is insufficient, the body shifts to a lipid-based economy. However, the brain cannot oxidize fatty acids for energy, so the production of ketones is protective (1, 2). In summary, the slow rate of b-oxidation of fatty acids seems to be a unique intrinsic feature of the brain tissue, particularly of the mitochondria of neurons. For comparison, in the heart and kidney tissue…	PMID: 22833869, PMID: 23921897,
		FAOXTC162TC142m	When glucose production is insufficient, the body shifts to a lipid-based economy. However, the brain cannot oxidize fatty acids for energy, so the production of ketones is protective (1, 2). In summary, the slow rate of b-oxidation of fatty acids seems to be a unique intrinsic feature of the brain tissue, particularly of the mitochondria of neurons. For comparison, in the heart and kidney tissue…	PMID: 22833869, PMID: 23921897,
		FAOXTC182TC162m	When glucose production is insufficient, the body shifts to a lipid-based economy. However, the brain cannot oxidize fatty acids for energy, so the production of ketones is protective (1, 2). In summary, the slow rate of b-oxidation of fatty acids seems to be a unique intrinsic feature of the brain tissue, particularly of the mitochondria of neurons. For comparison, in the heart and kidney tissue…	PMID: 22833869, PMID: 23921897,
		r0728	When glucose production is insufficient, the body shifts to a lipid-based economy. However, the brain cannot oxidize fatty acids for energy, so the production of ketones is protective (1, 2). In summary, the slow rate of b-oxidation of fatty acids seems to be a unique intrinsic feature of the brain tissue, particularly of the mitochondria of neurons. For comparison, in the heart and kidney tissue…	PMID: 22833869, PMID: 23921897,
		r1451	When glucose production is insufficient, the body shifts to a lipid-based economy. However, the brain cannot oxidize fatty acids for energy, so the production of ketones is protective (1, 2). In summary, the slow rate of b-oxidation of fatty acids seems to be a unique intrinsic feature of the brain tissue, particularly of the mitochondria of neurons. For comparison, in the heart and kidney tissue…	PMID: 22833869, PMID: 23921897,
		r1445	When glucose production is insufficient, the body shifts to a lipid-based economy. However, the brain cannot oxidize fatty acids for energy, so the production of ketones is protective (1, 2). In summary, the slow rate of b-oxidation of fatty acids seems to be a unique intrinsic feature of the brain tissue, particularly of the mitochondria of neurons. For comparison, in the heart and kidney tissue…	PMID: 22833869, PMID: 23921897,
		r0660	When glucose production is insufficient, the body shifts to a lipid-based economy. However, the brain cannot oxidize fatty acids for energy, so the production of ketones is protective (1, 2). In summary, the slow rate of b-oxidation of fatty acids seems to be a unique intrinsic feature of the brain tissue, particularly of the mitochondria of neurons. For comparison, in the heart and kidney tissue…	PMID: 22833869, PMID: 23921897,
		r1447	When glucose production is insufficient, the body shifts to a lipid-based economy. However, the brain cannot oxidize fatty acids for energy, so the production of ketones is protective (1, 2). In summary, the slow rate of b-oxidation of fatty acids seems to be a unique intrinsic feature of the brain tissue, particularly of the mitochondria of neurons. For comparison, in the heart and kidney tissue…	PMID: 22833869, PMID: 23921897,
		r1443	When glucose production is insufficient, the body shifts to a lipid-based economy. However, the brain cannot oxidize fatty acids for energy, so the production of ketones is protective (1, 2). In summary, the slow rate of b-oxidation of fatty acids seems to be a unique intrinsic feature of the brain tissue, particularly of the mitochondria of neurons. For comparison, in the heart and kidney tissue…	PMID: 22833869, PMID: 23921897,
		FAOXC121x	When glucose production is insufficient, the body shifts to a lipid-based economy. However, the brain cannot oxidize fatty acids for energy, so the production of ketones is protective (1, 2). In summary, the slow rate of b-oxidation of fatty acids seems to be a unique intrinsic feature of the brain tissue, particularly of the mitochondria of neurons. For comparison, in the heart and kidney tissue…	PMID: 22833869, PMID: 23921897,
		FAOXC61m	When glucose production is insufficient, the body shifts to a lipid-based economy. However, the brain cannot oxidize fatty acids for energy, so the production of ketones is protective (1, 2). In summary, the slow rate of b-oxidation of fatty acids seems to be a unique intrinsic feature of the brain tissue, particularly of the mitochondria of neurons. For comparison, in the heart and kidney tissue…	PMID: 22833869, PMID: 23921897,
		FAOXC61x	When glucose production is insufficient, the body shifts to a lipid-based economy. However, the brain cannot oxidize fatty acids for energy, so the production of ketones is protective (1, 2). In summary, the slow rate of b-oxidation of fatty acids seems to be a unique intrinsic feature of the brain tissue, particularly of the mitochondria of neurons. For comparison, in the heart and kidney tissue…	PMID: 22833869, PMID: 23921897,
		r1449	When glucose production is insufficient, the body shifts to a lipid-based economy. However, the brain cannot oxidize fatty acids for energy, so the production of ketones is protective (1, 2). In summary, the slow rate of b-oxidation of fatty acids seems to be a unique intrinsic feature of the brain tissue, particularly of the mitochondria of neurons. For comparison, in the heart and kidney tissue…	PMID: 22833869, PMID: 23921897,
		r1444	When glucose production is insufficient, the body shifts to a lipid-based economy. However, the brain cannot oxidize fatty acids for energy, so the production of ketones is protective (1, 2). In summary, the slow rate of b-oxidation of fatty acids seems to be a unique intrinsic feature of the brain tissue, particularly of the mitochondria of neurons. For comparison, in the heart and kidney tissue…	PMID: 22833869, PMID: 23921897,
		FAOXC15C13m	When glucose production is insufficient, the body shifts to a lipid-based economy. However, the brain cannot oxidize fatty acids for energy, so the production of ketones is protective (1, 2). In summary, the slow rate of b-oxidation of fatty acids seems to be a unique intrinsic feature of the brain tissue, particularly of the mitochondria of neurons. For comparison, in the heart and kidney tissue…	PMID: 22833869, PMID: 23921897,
carnitine shuttle		C161CRN2t	When glucose production is insufficient, the body shifts to a lipid-based economy. However, the brain cannot oxidize fatty acids for energy, so the production of ketones is protective (1, 2). In summary, the slow rate of b-oxidation of fatty acids seems to be a unique intrinsic feature of the brain tissue, particularly of the mitochondria of neurons. For comparison, in the heart and kidney tissue…	PMID: 22833869, PMID: 23921897,
		C161CPT12	When glucose production is insufficient, the body shifts to a lipid-based economy. However, the brain cannot oxidize fatty acids for energy, so the production of ketones is protective (1, 2). In summary, the slow rate of b-oxidation of fatty acids seems to be a unique intrinsic feature of the brain tissue, particularly of the mitochondria of neurons. For comparison, in the heart and kidney tissue…	PMID: 22833869, PMID: 23921897,
		OCD11COACPT1	When glucose production is insufficient, the body shifts to a lipid-based economy. However, the brain cannot oxidize fatty acids for energy, so the production of ketones is protective (1, 2). In summary, the slow rate of b-oxidation of fatty acids seems to be a unique intrinsic feature of the brain tissue, particularly of the mitochondria of neurons. For comparison, in the heart and kidney tissue…	PMID: 22833869, PMID: 23921897,
		OCD11CRNCACT	When glucose production is insufficient, the body shifts to a lipid-based economy. However, the brain cannot oxidize fatty acids for energy, so the production of ketones is protective (1, 2). In summary, the slow rate of b-oxidation of fatty acids seems to be a unique intrinsic feature of the brain tissue, particularly of the mitochondria of neurons. For comparison, in the heart and kidney tissue…	PMID: 22833869, PMID: 23921897,
		OCD11CRNCPT2	When glucose production is insufficient, the body shifts to a lipid-based economy. However, the brain cannot oxidize fatty acids for energy, so the production of ketones is protective (1, 2). In summary, the slow rate of b-oxidation of fatty acids seems to be a unique intrinsic feature of the brain tissue, particularly of the mitochondria of neurons. For comparison, in the heart and kidney tissue…	PMID: 22833869, PMID: 23921897,
		DMHPTCRNCPT1	When glucose production is insufficient, the body shifts to a lipid-based economy. However, the brain cannot oxidize fatty acids for energy, so the production of ketones is protective (1, 2). In summary, the slow rate of b-oxidation of fatty acids seems to be a unique intrinsic feature of the brain tissue, particularly of the mitochondria of neurons. For comparison, in the heart and kidney tissue…	PMID: 22833869, PMID: 23921897,
		DMHPTCRNCPT2	When glucose production is insufficient, the body shifts to a lipid-based economy. However, the brain cannot oxidize fatty acids for energy, so the production of ketones is protective (1, 2). In summary, the slow rate of b-oxidation of fatty acids seems to be a unique intrinsic feature of the brain tissue, particularly of the mitochondria of neurons. For comparison, in the heart and kidney tissue…	PMID: 22833869, PMID: 23921897,
		DMHPTCRNt	When glucose production is insufficient, the body shifts to a lipid-based economy. However, the brain cannot oxidize fatty acids for energy, so the production of ketones is protective (1, 2). In summary, the slow rate of b-oxidation of fatty acids seems to be a unique intrinsic feature of the brain tissue, particularly of the mitochondria of neurons. For comparison, in the heart and kidney tissue…	PMID: 22833869, PMID: 23921897,
		C51CPT1	When glucose production is insufficient, the body shifts to a lipid-based economy. However, the brain cannot oxidize fatty acids for energy, so the production of ketones is protective (1, 2). In summary, the slow rate of b-oxidation of fatty acids seems to be a unique intrinsic feature of the brain tissue, particularly of the mitochondria of neurons. For comparison, in the heart and kidney tissue…	PMID: 22833869, PMID: 23921897,
		C141OHc	When glucose production is insufficient, the body shifts to a lipid-based economy. However, the brain cannot oxidize fatty acids for energy, so the production of ketones is protective (1, 2). In summary, the slow rate of b-oxidation of fatty acids seems to be a unique intrinsic feature of the brain tissue, particularly of the mitochondria of neurons. For comparison, in the heart and kidney tissue…	PMID: 22833869, PMID: 23921897,
		C142OHc	When glucose production is insufficient, the body shifts to a lipid-based economy. However, the brain cannot oxidize fatty acids for energy, so the production of ketones is protective (1, 2). In summary, the slow rate of b-oxidation of fatty acids seems to be a unique intrinsic feature of the brain tissue, particularly of the mitochondria of neurons. For comparison, in the heart and kidney tissue…	PMID: 22833869, PMID: 23921897,
		C162OHc	When glucose production is insufficient, the body shifts to a lipid-based economy. However, the brain cannot oxidize fatty acids for energy, so the production of ketones is protective (1, 2). In summary, the slow rate of b-oxidation of fatty acids seems to be a unique intrinsic feature of the brain tissue, particularly of the mitochondria of neurons. For comparison, in the heart and kidney tissue…	PMID: 22833869, PMID: 23921897,
		C4OHc	When glucose production is insufficient, the body shifts to a lipid-based economy. However, the brain cannot oxidize fatty acids for energy, so the production of ketones is protective (1, 2). In summary, the slow rate of b-oxidation of fatty acids seems to be a unique intrinsic feature of the brain tissue, particularly of the mitochondria of neurons. For comparison, in the heart and kidney tissue…	PMID: 22833869, PMID: 23921897,
		C10OHc	When glucose production is insufficient, the body shifts to a lipid-based economy. However, the brain cannot oxidize fatty acids for energy, so the production of ketones is protective (1, 2). In summary, the slow rate of b-oxidation of fatty acids seems to be a unique intrinsic feature of the brain tissue, particularly of the mitochondria of neurons. For comparison, in the heart and kidney tissue…	PMID: 22833869, PMID: 23921897,
		C12OHc	When glucose production is insufficient, the body shifts to a lipid-based economy. However, the brain cannot oxidize fatty acids for energy, so the production of ketones is protective (1, 2). In summary, the slow rate of b-oxidation of fatty acids seems to be a unique intrinsic feature of the brain tissue, particularly of the mitochondria of neurons. For comparison, in the heart and kidney tissue…	PMID: 22833869, PMID: 23921897,
		C16OHc	When glucose production is insufficient, the body shifts to a lipid-based economy. However, the brain cannot oxidize fatty acids for energy, so the production of ketones is protective (1, 2). In summary, the slow rate of b-oxidation of fatty acids seems to be a unique intrinsic feature of the brain tissue, particularly of the mitochondria of neurons. For comparison, in the heart and kidney tissue…	PMID: 22833869, PMID: 23921897,
		C161OHc	When glucose production is insufficient, the body shifts to a lipid-based economy. However, the brain cannot oxidize fatty acids for energy, so the production of ketones is protective (1, 2). In summary, the slow rate of b-oxidation of fatty acids seems to be a unique intrinsic feature of the brain tissue, particularly of the mitochondria of neurons. For comparison, in the heart and kidney tissue…	PMID: 22833869, PMID: 23921897,
		FAOXC5OHc	When glucose production is insufficient, the body shifts to a lipid-based economy. However, the brain cannot oxidize fatty acids for energy, so the production of ketones is protective (1, 2). In summary, the slow rate of b-oxidation of fatty acids seems to be a unique intrinsic feature of the brain tissue, particularly of the mitochondria of neurons. For comparison, in the heart and kidney tissue…	PMID: 22833869, PMID: 23921897,
		C182OHc	When glucose production is insufficient, the body shifts to a lipid-based economy. However, the brain cannot oxidize fatty acids for energy, so the production of ketones is protective (1, 2). In summary, the slow rate of b-oxidation of fatty acids seems to be a unique intrinsic feature of the brain tissue, particularly of the mitochondria of neurons. For comparison, in the heart and kidney tissue…	PMID: 22833869, PMID: 23921897,
		C18OHc	When glucose production is insufficient, the body shifts to a lipid-based economy. However, the brain cannot oxidize fatty acids for energy, so the production of ketones is protective (1, 2). In summary, the slow rate of b-oxidation of fatty acids seems to be a unique intrinsic feature of the brain tissue, particularly of the mitochondria of neurons. For comparison, in the heart and kidney tissue…	PMID: 22833869, PMID: 23921897,
		C181OHc	When glucose production is insufficient, the body shifts to a lipid-based economy. However, the brain cannot oxidize fatty acids for energy, so the production of ketones is protective (1, 2). In summary, the slow rate of b-oxidation of fatty acids seems to be a unique intrinsic feature of the brain tissue, particularly of the mitochondria of neurons. For comparison, in the heart and kidney tissue…	PMID: 22833869, PMID: 23921897,
		C14OHc	When glucose production is insufficient, the body shifts to a lipid-based economy. However, the brain cannot oxidize fatty acids for energy, so the production of ketones is protective (1, 2). In summary, the slow rate of b-oxidation of fatty acids seems to be a unique intrinsic feature of the brain tissue, particularly of the mitochondria of neurons. For comparison, in the heart and kidney tissue…	PMID: 22833869, PMID: 23921897,
		DMNONCOACRNCPT1	When glucose production is insufficient, the body shifts to a lipid-based economy. However, the brain cannot oxidize fatty acids for energy, so the production of ketones is protective (1, 2). In summary, the slow rate of b-oxidation of fatty acids seems to be a unique intrinsic feature of the brain tissue, particularly of the mitochondria of neurons. For comparison, in the heart and kidney tissue…	PMID: 22833869, PMID: 23921897,
		DMNONCRNCPT2	When glucose production is insufficient, the body shifts to a lipid-based economy. However, the brain cannot oxidize fatty acids for energy, so the production of ketones is protective (1, 2). In summary, the slow rate of b-oxidation of fatty acids seems to be a unique intrinsic feature of the brain tissue, particularly of the mitochondria of neurons. For comparison, in the heart and kidney tissue…	PMID: 22833869, PMID: 23921897,
		DMNONCRNt	When glucose production is insufficient, the body shifts to a lipid-based economy. However, the brain cannot oxidize fatty acids for energy, so the production of ketones is protective (1, 2). In summary, the slow rate of b-oxidation of fatty acids seems to be a unique intrinsic feature of the brain tissue, particularly of the mitochondria of neurons. For comparison, in the heart and kidney tissue…	PMID: 22833869, PMID: 23921897,
		CSNATm	When glucose production is insufficient, the body shifts to a lipid-based economy. However, the brain cannot oxidize fatty acids for energy, so the production of ketones is protective (1, 2). In summary, the slow rate of b-oxidation of fatty acids seems to be a unique intrinsic feature of the brain tissue, particularly of the mitochondria of neurons. For comparison, in the heart and kidney tissue…	PMID: 22833869, PMID: 23921897,
		r0995	When glucose production is insufficient, the body shifts to a lipid-based economy. However, the brain cannot oxidize fatty acids for energy, so the production of ketones is protective (1, 2). In summary, the slow rate of b-oxidation of fatty acids seems to be a unique intrinsic feature of the brain tissue, particularly of the mitochondria of neurons. For comparison, in the heart and kidney tissue…	PMID: 22833869, PMID: 23921897,
		C6DCc	When glucose production is insufficient, the body shifts to a lipid-based economy. However, the brain cannot oxidize fatty acids for energy, so the production of ketones is protective (1, 2). In summary, the slow rate of b-oxidation of fatty acids seems to be a unique intrinsic feature of the brain tissue, particularly of the mitochondria of neurons. For comparison, in the heart and kidney tissue…	PMID: 22833869, PMID: 23921897,
		ADPCOACROT	When glucose production is insufficient, the body shifts to a lipid-based economy. However, the brain cannot oxidize fatty acids for energy, so the production of ketones is protective (1, 2). In summary, the slow rate of b-oxidation of fatty acids seems to be a unique intrinsic feature of the brain tissue, particularly of the mitochondria of neurons. For comparison, in the heart and kidney tissue…	PMID: 22833869, PMID: 23921897,
		ADRNCPT1	When glucose production is insufficient, the body shifts to a lipid-based economy. However, the brain cannot oxidize fatty acids for energy, so the production of ketones is protective (1, 2). In summary, the slow rate of b-oxidation of fatty acids seems to be a unique intrinsic feature of the brain tissue, particularly of the mitochondria of neurons. For comparison, in the heart and kidney tissue…	PMID: 22833869, PMID: 23921897,
		ADRNCPT2	When glucose production is insufficient, the body shifts to a lipid-based economy. However, the brain cannot oxidize fatty acids for energy, so the production of ketones is protective (1, 2). In summary, the slow rate of b-oxidation of fatty acids seems to be a unique intrinsic feature of the brain tissue, particularly of the mitochondria of neurons. For comparison, in the heart and kidney tissue…	PMID: 22833869, PMID: 23921897,
		ADRNCRNt	When glucose production is insufficient, the body shifts to a lipid-based economy. However, the brain cannot oxidize fatty acids for energy, so the production of ketones is protective (1, 2). In summary, the slow rate of b-oxidation of fatty acids seems to be a unique intrinsic feature of the brain tissue, particularly of the mitochondria of neurons. For comparison, in the heart and kidney tissue…	PMID: 22833869, PMID: 23921897,
		LNLNCACPT1	When glucose production is insufficient, the body shifts to a lipid-based economy. However, the brain cannot oxidize fatty acids for energy, so the production of ketones is protective (1, 2). In summary, the slow rate of b-oxidation of fatty acids seems to be a unique intrinsic feature of the brain tissue, particularly of the mitochondria of neurons. For comparison, in the heart and kidney tissue…	PMID: 22833869, PMID: 23921897,
		LNLNCACPT2	When glucose production is insufficient, the body shifts to a lipid-based economy. However, the brain cannot oxidize fatty acids for energy, so the production of ketones is protective (1, 2). In summary, the slow rate of b-oxidation of fatty acids seems to be a unique intrinsic feature of the brain tissue, particularly of the mitochondria of neurons. For comparison, in the heart and kidney tissue…	PMID: 22833869, PMID: 23921897,
		LNLNCACRNt	When glucose production is insufficient, the body shifts to a lipid-based economy. However, the brain cannot oxidize fatty acids for energy, so the production of ketones is protective (1, 2). In summary, the slow rate of b-oxidation of fatty acids seems to be a unique intrinsic feature of the brain tissue, particularly of the mitochondria of neurons. For comparison, in the heart and kidney tissue…	PMID: 22833869, PMID: 23921897,
		C204CPT1	When glucose production is insufficient, the body shifts to a lipid-based economy. However, the brain cannot oxidize fatty acids for energy, so the production of ketones is protective (1, 2). In summary, the slow rate of b-oxidation of fatty acids seems to be a unique intrinsic feature of the brain tissue, particularly of the mitochondria of neurons. For comparison, in the heart and kidney tissue…	PMID: 22833869, PMID: 23921897,
		C204CPT2	When glucose production is insufficient, the body shifts to a lipid-based economy. However, the brain cannot oxidize fatty acids for energy, so the production of ketones is protective (1, 2). In summary, the slow rate of b-oxidation of fatty acids seems to be a unique intrinsic feature of the brain tissue, particularly of the mitochondria of neurons. For comparison, in the heart and kidney tissue…	PMID: 22833869, PMID: 23921897,
		C204CRNt	When glucose production is insufficient, the body shifts to a lipid-based economy. However, the brain cannot oxidize fatty acids for energy, so the production of ketones is protective (1, 2). In summary, the slow rate of b-oxidation of fatty acids seems to be a unique intrinsic feature of the brain tissue, particularly of the mitochondria of neurons. For comparison, in the heart and kidney tissue…	PMID: 22833869, PMID: 23921897,
		r0441	When glucose production is insufficient, the body shifts to a lipid-based economy. However, the brain cannot oxidize fatty acids for energy, so the production of ketones is protective (1, 2). In summary, the slow rate of b-oxidation of fatty acids seems to be a unique intrinsic feature of the brain tissue, particularly of the mitochondria of neurons. For comparison, in the heart and kidney tissue…	PMID: 22833869, PMID: 23921897,
		r0443	When glucose production is insufficient, the body shifts to a lipid-based economy. However, the brain cannot oxidize fatty acids for energy, so the production of ketones is protective (1, 2). In summary, the slow rate of b-oxidation of fatty acids seems to be a unique intrinsic feature of the brain tissue, particularly of the mitochondria of neurons. For comparison, in the heart and kidney tissue…	PMID: 22833869, PMID: 23921897,
		ARACHCPT1	When glucose production is insufficient, the body shifts to a lipid-based economy. However, the brain cannot oxidize fatty acids for energy, so the production of ketones is protective (1, 2). In summary, the slow rate of b-oxidation of fatty acids seems to be a unique intrinsic feature of the brain tissue, particularly of the mitochondria of neurons. For comparison, in the heart and kidney tissue…	PMID: 22833869, PMID: 23921897,
		ARACHCPT2	When glucose production is insufficient, the body shifts to a lipid-based economy. However, the brain cannot oxidize fatty acids for energy, so the production of ketones is protective (1, 2). In summary, the slow rate of b-oxidation of fatty acids seems to be a unique intrinsic feature of the brain tissue, particularly of the mitochondria of neurons. For comparison, in the heart and kidney tissue…	PMID: 22833869, PMID: 23921897,
		ARACHCRNt	When glucose production is insufficient, the body shifts to a lipid-based economy. However, the brain cannot oxidize fatty acids for energy, so the production of ketones is protective (1, 2). In summary, the slow rate of b-oxidation of fatty acids seems to be a unique intrinsic feature of the brain tissue, particularly of the mitochondria of neurons. For comparison, in the heart and kidney tissue…	PMID: 22833869, PMID: 23921897,
		C40CPT1	When glucose production is insufficient, the body shifts to a lipid-based economy. However, the brain cannot oxidize fatty acids for energy, so the production of ketones is protective (1, 2). In summary, the slow rate of b-oxidation of fatty acids seems to be a unique intrinsic feature of the brain tissue, particularly of the mitochondria of neurons. For comparison, in the heart and kidney tissue…	PMID: 22833869, PMID: 23921897,
		C4CRNCPT2	When glucose production is insufficient, the body shifts to a lipid-based economy. However, the brain cannot oxidize fatty acids for energy, so the production of ketones is protective (1, 2). In summary, the slow rate of b-oxidation of fatty acids seems to be a unique intrinsic feature of the brain tissue, particularly of the mitochondria of neurons. For comparison, in the heart and kidney tissue…	PMID: 22833869, PMID: 23921897,
		r1401	When glucose production is insufficient, the body shifts to a lipid-based economy. However, the brain cannot oxidize fatty acids for energy, so the production of ketones is protective (1, 2). In summary, the slow rate of b-oxidation of fatty acids seems to be a unique intrinsic feature of the brain tissue, particularly of the mitochondria of neurons. For comparison, in the heart and kidney tissue…	PMID: 22833869, PMID: 23921897,
		C40CPT1	When glucose production is insufficient, the body shifts to a lipid-based economy. However, the brain cannot oxidize fatty acids for energy, so the production of ketones is protective (1, 2). In summary, the slow rate of b-oxidation of fatty acids seems to be a unique intrinsic feature of the brain tissue, particularly of the mitochondria of neurons. For comparison, in the heart and kidney tissue…	PMID: 22833869, PMID: 23921897,
		C4CRNCPT2	When glucose production is insufficient, the body shifts to a lipid-based economy. However, the brain cannot oxidize fatty acids for energy, so the production of ketones is protective (1, 2). In summary, the slow rate of b-oxidation of fatty acids seems to be a unique intrinsic feature of the brain tissue, particularly of the mitochondria of neurons. For comparison, in the heart and kidney tissue…	PMID: 22833869, PMID: 23921897,
		C4tmc	When glucose production is insufficient, the body shifts to a lipid-based economy. However, the brain cannot oxidize fatty acids for energy, so the production of ketones is protective (1, 2). In summary, the slow rate of b-oxidation of fatty acids seems to be a unique intrinsic feature of the brain tissue, particularly of the mitochondria of neurons. For comparison, in the heart and kidney tissue…	PMID: 22833869, PMID: 23921897,
		C4x	When glucose production is insufficient, the body shifts to a lipid-based economy. However, the brain cannot oxidize fatty acids for energy, so the production of ketones is protective (1, 2). In summary, the slow rate of b-oxidation of fatty acids seems to be a unique intrinsic feature of the brain tissue, particularly of the mitochondria of neurons. For comparison, in the heart and kidney tissue…	PMID: 22833869, PMID: 23921897,
		r1007	When glucose production is insufficient, the body shifts to a lipid-based economy. However, the brain cannot oxidize fatty acids for energy, so the production of ketones is protective (1, 2). In summary, the slow rate of b-oxidation of fatty acids seems to be a unique intrinsic feature of the brain tissue, particularly of the mitochondria of neurons. For comparison, in the heart and kidney tissue…	PMID: 22833869, PMID: 23921897,
		r1008	When glucose production is insufficient, the body shifts to a lipid-based economy. However, the brain cannot oxidize fatty acids for energy, so the production of ketones is protective (1, 2). In summary, the slow rate of b-oxidation of fatty acids seems to be a unique intrinsic feature of the brain tissue, particularly of the mitochondria of neurons. For comparison, in the heart and kidney tissue…	PMID: 22833869, PMID: 23921897,
		C226CPT1	When glucose production is insufficient, the body shifts to a lipid-based economy. However, the brain cannot oxidize fatty acids for energy, so the production of ketones is protective (1, 2). In summary, the slow rate of b-oxidation of fatty acids seems to be a unique intrinsic feature of the brain tissue, particularly of the mitochondria of neurons. For comparison, in the heart and kidney tissue…	PMID: 22833869, PMID: 23921897,
		C226CPT2	When glucose production is insufficient, the body shifts to a lipid-based economy. However, the brain cannot oxidize fatty acids for energy, so the production of ketones is protective (1, 2). In summary, the slow rate of b-oxidation of fatty acids seems to be a unique intrinsic feature of the brain tissue, particularly of the mitochondria of neurons. For comparison, in the heart and kidney tissue…	PMID: 22833869, PMID: 23921897,
		C226CRNt	When glucose production is insufficient, the body shifts to a lipid-based economy. However, the brain cannot oxidize fatty acids for energy, so the production of ketones is protective (1, 2). In summary, the slow rate of b-oxidation of fatty acids seems to be a unique intrinsic feature of the brain tissue, particularly of the mitochondria of neurons. For comparison, in the heart and kidney tissue…	PMID: 22833869, PMID: 23921897,
		CLPNDCPT1	When glucose production is insufficient, the body shifts to a lipid-based economy. However, the brain cannot oxidize fatty acids for energy, so the production of ketones is protective (1, 2). In summary, the slow rate of b-oxidation of fatty acids seems to be a unique intrinsic feature of the brain tissue, particularly of the mitochondria of neurons. For comparison, in the heart and kidney tissue…	PMID: 22833869, PMID: 23921897,
		CLPNDCPT2	When glucose production is insufficient, the body shifts to a lipid-based economy. However, the brain cannot oxidize fatty acids for energy, so the production of ketones is protective (1, 2). In summary, the slow rate of b-oxidation of fatty acids seems to be a unique intrinsic feature of the brain tissue, particularly of the mitochondria of neurons. For comparison, in the heart and kidney tissue…	PMID: 22833869, PMID: 23921897,
		CLPNDCRNt	When glucose production is insufficient, the body shifts to a lipid-based economy. However, the brain cannot oxidize fatty acids for energy, so the production of ketones is protective (1, 2). In summary, the slow rate of b-oxidation of fatty acids seems to be a unique intrinsic feature of the brain tissue, particularly of the mitochondria of neurons. For comparison, in the heart and kidney tissue…	PMID: 22833869, PMID: 23921897,
		C102CPT1	When glucose production is insufficient, the body shifts to a lipid-based economy. However, the brain cannot oxidize fatty acids for energy, so the production of ketones is protective (1, 2). In summary, the slow rate of b-oxidation of fatty acids seems to be a unique intrinsic feature of the brain tissue, particularly of the mitochondria of neurons. For comparison, in the heart and kidney tissue…	PMID: 22833869, PMID: 23921897,
		C100CPT1	When glucose production is insufficient, the body shifts to a lipid-based economy. However, the brain cannot oxidize fatty acids for energy, so the production of ketones is protective (1, 2). In summary, the slow rate of b-oxidation of fatty acids seems to be a unique intrinsic feature of the brain tissue, particularly of the mitochondria of neurons. For comparison, in the heart and kidney tissue…	PMID: 22833869, PMID: 23921897,
		C101CPT1	When glucose production is insufficient, the body shifts to a lipid-based economy. However, the brain cannot oxidize fatty acids for energy, so the production of ketones is protective (1, 2). In summary, the slow rate of b-oxidation of fatty acids seems to be a unique intrinsic feature of the brain tissue, particularly of the mitochondria of neurons. For comparison, in the heart and kidney tissue…	PMID: 22833869, PMID: 23921897,
		DLNLCGCPT1	When glucose production is insufficient, the body shifts to a lipid-based economy. However, the brain cannot oxidize fatty acids for energy, so the production of ketones is protective (1, 2). In summary, the slow rate of b-oxidation of fatty acids seems to be a unique intrinsic feature of the brain tissue, particularly of the mitochondria of neurons. For comparison, in the heart and kidney tissue…	PMID: 22833869, PMID: 23921897,
		DLNLCGCPT2	When glucose production is insufficient, the body shifts to a lipid-based economy. However, the brain cannot oxidize fatty acids for energy, so the production of ketones is protective (1, 2). In summary, the slow rate of b-oxidation of fatty acids seems to be a unique intrinsic feature of the brain tissue, particularly of the mitochondria of neurons. For comparison, in the heart and kidney tissue…	PMID: 22833869, PMID: 23921897,
		DLNLCGCRNt	When glucose production is insufficient, the body shifts to a lipid-based economy. However, the brain cannot oxidize fatty acids for energy, so the production of ketones is protective (1, 2). In summary, the slow rate of b-oxidation of fatty acids seems to be a unique intrinsic feature of the brain tissue, particularly of the mitochondria of neurons. For comparison, in the heart and kidney tissue…	PMID: 22833869, PMID: 23921897,
		DCSPTN1CPT1	When glucose production is insufficient, the body shifts to a lipid-based economy. However, the brain cannot oxidize fatty acids for energy, so the production of ketones is protective (1, 2). In summary, the slow rate of b-oxidation of fatty acids seems to be a unique intrinsic feature of the brain tissue, particularly of the mitochondria of neurons. For comparison, in the heart and kidney tissue…	PMID: 22833869, PMID: 23921897,
		DCSPTN1CPT2	When glucose production is insufficient, the body shifts to a lipid-based economy. However, the brain cannot oxidize fatty acids for energy, so the production of ketones is protective (1, 2). In summary, the slow rate of b-oxidation of fatty acids seems to be a unique intrinsic feature of the brain tissue, particularly of the mitochondria of neurons. For comparison, in the heart and kidney tissue…	PMID: 22833869, PMID: 23921897,
		DCSPTN1CRNt	When glucose production is insufficient, the body shifts to a lipid-based economy. However, the brain cannot oxidize fatty acids for energy, so the production of ketones is protective (1, 2). In summary, the slow rate of b-oxidation of fatty acids seems to be a unique intrinsic feature of the brain tissue, particularly of the mitochondria of neurons. For comparison, in the heart and kidney tissue…	PMID: 22833869, PMID: 23921897,
		FAOXC12DCc	When glucose production is insufficient, the body shifts to a lipid-based economy. However, the brain cannot oxidize fatty acids for energy, so the production of ketones is protective (1, 2). In summary, the slow rate of b-oxidation of fatty acids seems to be a unique intrinsic feature of the brain tissue, particularly of the mitochondria of neurons. For comparison, in the heart and kidney tissue…	PMID: 22833869, PMID: 23921897,
		FAOXC12DCx	When glucose production is insufficient, the body shifts to a lipid-based economy. However, the brain cannot oxidize fatty acids for energy, so the production of ketones is protective (1, 2). In summary, the slow rate of b-oxidation of fatty acids seems to be a unique intrinsic feature of the brain tissue, particularly of the mitochondria of neurons. For comparison, in the heart and kidney tissue…	PMID: 22833869, PMID: 23921897,
		C120CPT1	When glucose production is insufficient, the body shifts to a lipid-based economy. However, the brain cannot oxidize fatty acids for energy, so the production of ketones is protective (1, 2). In summary, the slow rate of b-oxidation of fatty acids seems to be a unique intrinsic feature of the brain tissue, particularly of the mitochondria of neurons. For comparison, in the heart and kidney tissue…	PMID: 22833869, PMID: 23921897,
		EICOSTETCPT1	When glucose production is insufficient, the body shifts to a lipid-based economy. However, the brain cannot oxidize fatty acids for energy, so the production of ketones is protective (1, 2). In summary, the slow rate of b-oxidation of fatty acids seems to be a unique intrinsic feature of the brain tissue, particularly of the mitochondria of neurons. For comparison, in the heart and kidney tissue…	PMID: 22833869, PMID: 23921897,
		EICOSTETCPT2	When glucose production is insufficient, the body shifts to a lipid-based economy. However, the brain cannot oxidize fatty acids for energy, so the production of ketones is protective (1, 2). In summary, the slow rate of b-oxidation of fatty acids seems to be a unique intrinsic feature of the brain tissue, particularly of the mitochondria of neurons. For comparison, in the heart and kidney tissue…	PMID: 22833869, PMID: 23921897,
		EICOSTETCRNt	When glucose production is insufficient, the body shifts to a lipid-based economy. However, the brain cannot oxidize fatty acids for energy, so the production of ketones is protective (1, 2). In summary, the slow rate of b-oxidation of fatty acids seems to be a unique intrinsic feature of the brain tissue, particularly of the mitochondria of neurons. For comparison, in the heart and kidney tissue…	PMID: 22833869, PMID: 23921897,
		LNLNCGCPT1	When glucose production is insufficient, the body shifts to a lipid-based economy. However, the brain cannot oxidize fatty acids for energy, so the production of ketones is protective (1, 2). In summary, the slow rate of b-oxidation of fatty acids seems to be a unique intrinsic feature of the brain tissue, particularly of the mitochondria of neurons. For comparison, in the heart and kidney tissue…	PMID: 22833869, PMID: 23921897,
		LNLNCGCPT2	When glucose production is insufficient, the body shifts to a lipid-based economy. However, the brain cannot oxidize fatty acids for energy, so the production of ketones is protective (1, 2). In summary, the slow rate of b-oxidation of fatty acids seems to be a unique intrinsic feature of the brain tissue, particularly of the mitochondria of neurons. For comparison, in the heart and kidney tissue…	PMID: 22833869, PMID: 23921897,
		LNLNCGCRNt	When glucose production is insufficient, the body shifts to a lipid-based economy. However, the brain cannot oxidize fatty acids for energy, so the production of ketones is protective (1, 2). In summary, the slow rate of b-oxidation of fatty acids seems to be a unique intrinsic feature of the brain tissue, particularly of the mitochondria of neurons. For comparison, in the heart and kidney tissue…	PMID: 22833869, PMID: 23921897,
		FAOXC5C5DCc	When glucose production is insufficient, the body shifts to a lipid-based economy. However, the brain cannot oxidize fatty acids for energy, so the production of ketones is protective (1, 2). In summary, the slow rate of b-oxidation of fatty acids seems to be a unique intrinsic feature of the brain tissue, particularly of the mitochondria of neurons. For comparison, in the heart and kidney tissue…	PMID: 22833869, PMID: 23921897,
		HPDCACRNCPT1	When glucose production is insufficient, the body shifts to a lipid-based economy. However, the brain cannot oxidize fatty acids for energy, so the production of ketones is protective (1, 2). In summary, the slow rate of b-oxidation of fatty acids seems to be a unique intrinsic feature of the brain tissue, particularly of the mitochondria of neurons. For comparison, in the heart and kidney tissue…	PMID: 22833869, PMID: 23921897,
		HPDCACRNCPT2	When glucose production is insufficient, the body shifts to a lipid-based economy. However, the brain cannot oxidize fatty acids for energy, so the production of ketones is protective (1, 2). In summary, the slow rate of b-oxidation of fatty acids seems to be a unique intrinsic feature of the brain tissue, particularly of the mitochondria of neurons. For comparison, in the heart and kidney tissue…	PMID: 22833869, PMID: 23921897,
		HPDCACRNt	When glucose production is insufficient, the body shifts to a lipid-based economy. However, the brain cannot oxidize fatty acids for energy, so the production of ketones is protective (1, 2). In summary, the slow rate of b-oxidation of fatty acids seems to be a unique intrinsic feature of the brain tissue, particularly of the mitochondria of neurons. For comparison, in the heart and kidney tissue…	PMID: 22833869, PMID: 23921897,
[truncated: 116 more rows]

## Sheet: Table S6
Metabolite	Metabolic rate μmole/g/min
[truncated: 16 more rows]

[truncated: 3 more sheets: Table S7, Table S8, Table S9]
